# Supplementary material
Source: Research Square preprint supplement (doi:10.21203/rs.3.rs-9385619/v1)
Supplement: Supplementary file 1 [file c19a3710045bac08f8e86230.xlsx]

## Sheet: Sheet3
School Address	Grade	A101	A102	A103	A201	A202	A3	A4	A501	A502	A601	A602	A701	A702	A8	X1	X2	X3	X4	X5	X6	X7	X8	X9	X10	X11	X12	X13	X14	X15	X16	X17	X18	X19	X20	VPA	MPA	LPA	SBT	MVPA	TPA	Height	BMI
1	1	1	140	34	2013	1	1	3	5	60	5	60	5	60	220	1	0	1	0	0	0	0	0	1	2	1	2	2	1	2	3	2	2	3	2	300	300	300	1540	600	900	1.4	17.35
1	1	1	153	35	2013	3	1	2	5	60	5	60	5	60	220	1	1	1	0	1	0	0	1	3	5	2	5	4	5	3	3	5	2	2	1	300	300	300	1540	600	900	1.53	14.95
1	1	1	147	32	2013	4	1	2	5	60	5	60	5	60	220	1	0	1	1	1	1	0	1	4	4	4	4	3	4	2	3	4	4	2	2	300	300	300	1540	600	900	1.47	14.81
1	1	1	140	31	2013	6	1	2	5	60	5	60	5	60	220	1	1	1	1	1	1	1	1	5	5	5	5	5	5	5	5	5	5	5	5	300	300	300	1540	600	900	1.4	15.82
1	1	1	143	36	2013	7	1	2	5	60	5	60	5	60	220	0	1	0	0	1	0	0	1	3	1	4	4	4	4	1	1	3	3	4	4	300	300	300	1540	600	900	1.43	17.6
1	1	1	153	34	2013	7	1	2	5	60	5	60	5	60	220	1	1	1	1	0	1	1	1	4	5	3	3	4	2	3	3	3	3	3	3	300	300	300	1540	600	900	1.53	14.52
1	1	1	142	32	2013	7	1	2	5	60	5	60	5	60	220	0	1	1	1	1	1	1	1	5	5	5	5	5	5	5	5	5	3	5	5	300	300	300	1540	600	900	1.42	15.87
1	1	1	141	32	2012	12	1	2	5	60	5	60	5	60	220	1	1	1	1	1	1	1	1	2	2	2	2	2	2	1	1	1	1	5	5	300	300	300	1540	600	900	1.41	16.1
1	1	1	151	41	2013	9	1	2	5	60	5	60	5	60	60	1	0	0	0	0	0	0	1	2	2	1	3	2	1	1	1	3	1	2	3	300	300	300	420	600	900	1.51	17.98
1	1	1	142	34	2013	1	1	2	5	60	5	60	5	60	20	1	1	1	1	1	0	0	1	5	5	5	5	5	5	4	4	5	4	4	5	300	300	300	140	600	900	1.42	16.86
1	1	1	140	30	2013	9	1	2	5	60	5	60	5	60	20	1	1	1	1	1	1	1	1	4	3	4	4	5	5	3	2	5	3	4	5	300	300	300	140	600	900	1.4	15.31
1	1	1	154	51	2013	4	1	2	5	60	5	60	5	60	220	1	0	1	0	0	0	0	1	1	4	1	1	1	1	1	1	2	3	3	1	300	300	300	1540	600	900	1.54	21.5
1	1	1	138	43	2013	6	1	2	5	60	5	60	5	60	220	0	1	1	0	1	0	0	1	4	4	5	4	4	5	3	3	5	3	4	5	300	300	300	1540	600	900	1.38	22.58
1	1	1	152	42	2013	6	1	2	5	60	5	60	5	60	220	0	0	1	0	1	1	0	1	2	2	2	2	3	4	3	2	2	3	1	2	300	300	300	1540	600	900	1.52	18.18
1	1	1	139	40	2013	6	1	2	5	60	5	60	5	60	220	0	0	1	0	1	0	0	1	3	2	2	2	3	2	2	1	2	2	1	3	300	300	300	1540	600	900	1.39	20.7
1	1	1	142	38	2013	6	1	2	5	60	5	60	5	60	220	0	1	1	0	1	1	0	1	4	4	5	4	4	5	3	3	5	3	4	5	300	300	300	1540	600	900	1.42	18.85
1	1	1	149	41	2013	10	1	2	5	60	5	60	5	60	220	1	1	1	1	1	1	1	1	3	3	3	3	3	3	3	3	3	3	3	3	300	300	300	1540	600	900	1.49	18.47
1	1	1	152	53	2013	8	1	3	5	60	5	60	5	40	260	0	1	1	1	1	1	1	1	1	1	2	3	3	3	2	1	2	2	2	2	300	300	200	1820	600	800	1.52	22.94
1	1	1	145	40	2013	7	1	2	5	60	2	120	5	60	220	0	0	1	0	0	1	0	1	4	3	2	3	3	2	3	2	3	2	2	3	300	240	300	1540	540	840	1.45	19.02
1	1	1	133	33	2013	3	1	3	5	60	5	60	5	60	20	1	0	1	1	0	0	0	1	1	1	1	1	1	1	5	4	2	1	1	2	300	300	300	140	600	900	1.33	18.66
1	1	1	143	51	2013	10	1	2	5	60	5	60	5	60	220	1	1	1	1	1	1	1	1	5	4	5	4	3	4	4	5	4	2	4	3	300	300	300	1540	600	900	1.43	24.94
1	1	1	153	47	2012	10	1	3	7	40	4	30	7	40	400	1	0	1	1	1	0	0	1	4	4	4	3	3	4	2	2	2	5	3	4	280	120	280	2800	400	680	1.53	20.08
1	1	1	141	63	2012	12	1	3	5	50	2	20	7	20	40	0	1	1	0	1	0	1	1	3	4	4	3	4	4	2	2	1	3	5	4	250	40	140	280	290	430	1.41	31.69
1	1	1	164	30	2012	8	1	1	6	41	5	20	5	20	20	0	0	1	0	0	0	0	0	3	2	2	2	1	3	2	2	2	2	1	3	246	100	100	140	346	446	1.64	11.22
1	1	1	150	60	2010	6	1	1	7	35	7	10	6.5	11	400	0	0	1	0	0	0	0	1	2	1	1	2	1	1	2	2	1	1	1	1	245	70	71.5	2800	315	386.5	1.5	26.67
1	1	1	143	31	2012	10	1	1	6	40	2.5	25	7	20	220	0	0	1	0	0	1	0	1	1	1	1	3	2	3	1	1	1	1	1	2	240	62.5	140	1540	302.5	442.5	1.43	15.16
1	1	1	157	67	2013	2	1	2	6	40	6	40	5	10	30	0	0	1	1	1	0	0	1	5	1	5	5	5	5	1	2	4	3	4	4	240	240	50	210	480	530	1.57	27.18
1	1	1	143	32	2013	4	1	1	2.5	95	3	10	7	30	113.3	0	0	1	1	0	1	0	1	3	2	3	1	3	5	1	3	3	2	4	3	237.5	30	210	793.33	267.5	477.5	1.43	15.65
1	1	1	153	56	2012	3	1	1	2	117.5	2	30	7	20	223.3	0	0	0	0	1	0	1	0	1	1	2	1	2	3	3	2	1	1	1	2	235	60	140	1563.33	295	435	1.53	23.92
1	2	1	155	38	2012	11	1	2	4	20	5	40	7	60	180	0	1	1	1	1	1	1	1	4	5	4	4	3	3	4	3	5	4	5	4	80	200	420	1260	280	700	1.55	15.82
1	2	1	145	35	2012	3	1	2	4	20	3	20	7	30	260	1	1	1	1	1	1	1	1	3	3	4	3	4	4	3	4	4	4	4	4	80	60	210	1820	140	350	1.45	16.65
1	2	1	164	42	2012	2	1	2	2	40	3	60	7	60	50	0	1	1	1	1	1	1	1	5	4	4	4	5	5	4	3	5	3	3	4	80	180	420	350	260	680	1.64	15.62
1	2	1	164	38	2012	4	1	1	4	20	1	30	7	20	20	0	0	1	0	0	1	0	0	3	1	2	2	2	3	2	2	1	2	2	2	80	30	140	140	110	250	1.64	14.13
1	2	1	154	43	2011	11	1	2	4	20	1	20	6	30	300	0	0	1	1	1	0	0	1	4	3	3	4	3	3	3	3	3	4	3	4	80	20	180	2100	100	280	1.54	18.13
1	2	1	157	48	2012	4	1	2	4	20	1	20	7	20	300	1	1	1	1	0	1	1	1	3	2	3	3	4	3	3	3	3	3	4	3	80	20	140	2100	100	240	1.57	19.47
1	2	1	151	54	2012	3	1	2	2	40	1	20	7	18	420	0	0	0	0	0	0	0	1	2	1	1	1	1	1	2	2	2	1	1	1	80	20	126	2940	100	226	1.51	23.68
1	2	1	143	44	2012	5	1	2	4	20	3	20	7	20	200	1	1	1	0	0	0	0	1	3	2	2	3	3	3	3	3	3	3	3	3	80	60	140	1400	140	280	1.43	21.52
1	2	1	150	43	2012	7	1	3	4	20	4	30	7	60	60	0	0	1	1	1	1	0	1	5	3	3	4	3	3	5	5	5	5	5	5	80	120	420	420	200	620	1.5	19.11
1	2	1	161	53	2012	1	1	2	4	20	3	20	6	20	120	1	1	1	0	0	0	1	1	4	4	3	4	4	3	4	4	3	3	3	4	80	60	120	840	140	260	1.61	20.45
1	2	1	161	50	2007	5	1	2	2	40	4	40	7	40	320	1	0	0	1	0	1	1	1	3	1	4	2	1	4	5	3	4	5	3	5	80	160	280	2240	240	520	1.61	19.29
1	2	1	166	71	2012	4	1	2	2	35	3	45	3.5	15	420	0	0	0	1	0	0	0	1	4	3	2	3	3	2	3	1	2	5	1	3	70	135	52.5	2940	205	257.5	1.66	25.77
1	2	1	140	27	2012	6	1	2	3	20	5	20	2	10	360	0	0	0	0	0	1	0	1	1	1	1	4	2	1	2	1	2	2	1	3	60	100	20	2520	160	180	1.4	13.78
1	2	1	154	40	2011	11	1	2	3	20	4	20	7	30	250	1	1	0	1	1	1	1	1	3	4	4	3	4	4	2	2	4	3	4	4	60	80	210	1750	140	350	1.54	16.87
1	2	1	160	45	2012	2	1	2	1	60	4	60	5	30	90	0	0	1	1	0	0	1	1	5	3	2	4	3	2	3	3	5	2	1	4	60	240	150	630	300	450	1.6	17.58
1	2	1	167	50	2012	2	1	2	2	30	2	20	5	20	30	0	1	0	1	1	1	0	1	4	3	3	4	3	3	3	3	3	5	3	3	60	40	100	210	100	200	1.67	17.93
1	2	1	148	35	2009	10	1	2	3	20	2	25	7	25	600	0	0	1	1	1	0	0	1	4	5	3	2	5	4	2	1	2	4	2	2	60	50	175	4200	110	285	1.48	15.98
1	2	1	152	50	2012	7	1	2	3	20	5	30	7	30	420	0	1	0	1	1	0	0	1	4	4	3	4	3	3	3	2	3	3	2	2	60	150	210	2940	210	420	1.52	21.64
1	2	1	168	59	2011	8	1	2	2	30	1	40	3	40	420	0	0	0	0	1	1	0	1	2	1	2	2	1	1	2	1	3	4	2	4	60	40	120	2940	100	220	1.68	20.9
1	2	1	175	70	2011	1	1	2	3	20	5	20	7	20	180	0	1	1	0	0	0	0	1	2	2	4	2	1	1	3	2	2	1	1	1	60	100	140	1260	160	300	1.75	22.86
1	2	1	164	55	2011	6	1	2	2	30	2	25	3	20	280	1	1	1	1	1	1	0	1	3	2	2	3	2	3	3	3	2	4	5	3	60	50	60	1960	110	170	1.64	20.45
1	2	1	154	47	2012	3	1	3	3	20	5	30	7	15	40	1	1	0	1	1	0	0	1	4	2	2	2	2	2	3	2	4	3	2	3	60	150	105	280	210	315	1.54	19.82
1	2	1	163	60	2010	10	1	2	3	20	4	30	7	20	40	1	0	0	0	0	0	0	1	4	4	5	4	4	5	2	5	5	1	1	3	60	120	140	280	180	320	1.63	22.58
1	2	1	170	75	2012	6	1	2	1	60	5	40	4	65	300	0	0	1	0	1	0	0	1	3	1	2	3	2	3	2	1	2	3	2	3	60	200	260	2100	260	520	1.7	25.95
1	2	1	164	75	2010	1	1	2	6	10	5	20	3	20	230	0	1	1	1	1	0	1	1	3	2	1	3	4	1	5	5	4	2	2	4	60	100	60	1610	160	220	1.64	27.89
1	2	1	152	52	2012	6	1	3	2	21	4	30	7	40	180	0	1	0	0	0	0	0	1	2	2	1	3	2	2	3	3	2	2	1	2	42	120	280	1260	162	442	1.52	22.51
1	2	1	148	31	2012	7	1	2	2	20	2	60	7	20	20	1	1	1	1	1	0	1	1	3	3	3	3	3	3	3	3	3	2	2	2	40	120	140	140	160	300	1.48	14.15
1	2	1	180	60	2011	11	1	2	2	20	5	30	7	30	300	1	0	0	0	1	0	0	0	2	2	1	3	3	1	2	2	1	4	2	3	40	150	210	2100	190	400	1.8	18.52
1	2	1	171	56	2012	2	2	2	2	20	5	40	4	10	260	0	0	1	1	0	1	0	1	4	1	1	1	2	1	1	1	2	3	3	1	40	200	40	1820	240	280	1.71	19.15
1	2	1	155	38	2012	1	1	1	3	10	7	20	4	12	40	0	1	1	1	0	0	0	1	2	1	1	2	2	1	1	1	2	2	1	2	30	140	48	280	170	218	1.55	15.82
1	2	1	160	50	2010	12	1	1	2	15	3	40	3	10	30	0	0	0	0	0	0	0	0	2	1	2	1	1	1	2	1	2	1	1	1	30	120	30	210	150	180	1.6	19.53
1	2	1	167	75	2011	12	1	2	2	15	3	24	5	30	18	0	0	0	1	0	1	0	1	3	4	4	3	2	4	2	1	3	3	2	2	30	72	150	126	102	252	1.67	26.89
1	1	2	151	37	2012	10	2	3	5	60	5	60	7	60	260	1	0	1	1	1	1	0	1	3	4	5	5	4	5	1	2	2	2	2	2	300	300	420	1820	600	1020	1.51	16.23
1	1	2	148	34	2013	3	1	2	5	60	5	60	5	60	260	1	0	0	1	1	0	0	1	3	2	3	2	2	3	2	2	4	4	2	3	300	300	300	1820	600	900	1.48	15.52
1	1	2	136	25	2013	3	1	2	5	60	5	60	5	60	260	1	1	1	1	1	1	0	1	3	2	2	2	2	2	3	3	1	2	2	2	300	300	300	1820	600	900	1.36	13.52
1	1	2	153	36	2013	1	1	2	5	60	5	60	5	60	220	1	1	0	1	0	1	0	1	4	3	4	4	4	3	3	5	4	3	3	5	300	300	300	1540	600	900	1.53	15.38
1	1	2	152	40	2013	2	1	2	5	60	5	60	5	60	220	1	1	1	1	1	0	0	1	5	4	3	4	4	3	4	3	3	4	3	4	300	300	300	1540	600	900	1.52	17.31
1	1	2	145	37	2013	3	1	2	5	60	5	60	5	60	220	1	1	1	1	1	1	0	1	3	3	2	3	3	2	3	3	2	3	3	3	300	300	300	1540	600	900	1.45	17.6
1	1	2	143	28	2013	8	1	2	5	60	5	60	5	60	220	0	0	0	0	1	1	0	1	2	2	4	3	2	4	5	1	2	2	2	2	300	300	300	1540	600	900	1.43	13.69
1	1	2	145	27	2013	10	1	2	5	60	5	60	5	60	220	1	1	1	1	1	1	1	1	1	3	3	1	3	3	1	3	1	1	4	3	300	300	300	1540	600	900	1.45	12.84
1	1	2	151	41	2012	10	1	2	5	60	5	60	5	60	220	1	1	1	1	1	0	1	1	3	2	3	3	2	3	3	3	5	3	3	1	300	300	300	1540	600	900	1.51	17.98
1	1	2	146	38	2012	6	1	2	5	60	2	60	5	60	260	0	0	1	1	0	0	0	1	5	4	3	5	3	3	4	3	3	4	3	3	300	120	300	1820	420	720	1.46	17.83
1	1	2	147	37	2012	6	1	2	5	60	2	60	5	60	220	0	0	1	1	0	0	1	0	4	3	3	4	3	5	4	4	5	3	5	4	300	120	300	1540	420	720	1.47	17.12
1	1	2	151	41	2013	2	1	2	5	60	5	60	5	60	20	0	0	0	0	0	1	1	1	4	2	4	4	3	5	3	4	4	5	3	5	300	300	300	140	600	900	1.51	17.98
1	1	2	154	36	2013	2	1	2	5	60	5	60	5	60	20	0	0	1	1	1	1	1	1	5	5	5	5	5	5	5	5	4	5	5	4	300	300	300	140	600	900	1.54	15.18
1	1	2	141	31	2013	4	1	3	5	60	5	60	5	60	20	1	0	1	1	0	0	0	1	3	2	4	4	4	4	4	2	3	4	4	3	300	300	300	140	600	900	1.41	15.59
1	1	2	145	32	2013	3	1	2	5	60	2	60	5	60	20	0	0	1	1	1	1	0	1	3	3	3	3	3	3	2	1	3	4	2	3	300	120	300	140	420	720	1.45	15.22
1	1	2	158	47	2013	1	1	2	5	60	5	60	5	60	220	1	1	1	0	1	1	1	1	3	4	3	3	2	4	4	2	3	2	2	3	300	300	300	1540	600	900	1.58	18.83
1	1	2	145	42	2013	1	1	2	5	60	5	60	5	60	220	1	1	1	1	1	0	0	0	4	3	4	3	3	3	5	5	2	3	3	3	300	300	300	1540	600	900	1.45	19.98
1	1	2	146	40	2013	7	1	2	5	60	5	60	5	60	220	0	0	0	0	0	0	0	1	5	3	1	3	3	3	4	3	4	5	5	2	300	300	300	1540	600	900	1.46	18.77
1	1	2	151	42	2013	11	1	2	5	60	5	60	5	60	220	1	0	0	0	1	0	0	0	3	2	2	2	3	2	2	1	2	1	1	2	300	300	300	1540	600	900	1.51	18.42
1	1	2	155	48	2013	3	1	2	5	60	5	60	5	60	20	1	1	1	1	1	0	0	1	4	5	5	4	5	5	3	3	5	3	3	4	300	300	300	140	600	900	1.55	19.98
1	1	2	151	34	2013	6	1	3	7	40	2	30	5	30	466.7	1	0	0	1	0	0	0	1	4	4	4	5	5	5	3	3	2	2	3	4	280	60	150	3266.67	340	490	1.51	14.91
1	1	2	159.5	45.5	2012	9	1	1	5	55	5	10	7	15	15	0	0	1	0	0	0	0	0	3	2	2	3	3	2	2	2	2	3	2	3	275	50	105	105	325	430	1.6	17.89
1	1	2	158	51	2012	11	1	1	5.5	50	5	10	5	10	20	0	0	1	1	0	0	0	0	3	3	3	3	3	3	2	2	3	2	3	3	275	50	50	140	325	375	1.58	20.43
1	1	2	152	36	2013	1	1	1	7	35	7	10	4.5	10	35	0	0	1	1	0	0	0	0	2	2	1	2	1	1	1	2	1	2	2	1	245	70	45	245	315	360	1.52	15.58
1	2	2	150	33	2012	11	1	1	5.5	15	3	20	5	10	15	0	0	1	0	0	1	0	1	2	2	2	3	2	2	2	2	3	4	3	3	82.5	60	50	105	142.5	192.5	1.5	14.67
1	2	2	140	30	2012	6	1	2	4	20	1	20	7	30	300	0	0	1	1	1	0	0	0	3	3	5	3	4	4	3	2	3	3	2	3	80	20	210	2100	100	310	1.4	15.31
1	2	2	154	35	2012	1	1	2	4	20	1	20	7	20	300	0	1	1	0	0	0	0	1	4	3	5	3	2	4	2	4	2	2	3	2	80	20	140	2100	100	240	1.54	14.76
1	2	2	159	45	2011	11	1	3	2	40	3	40	7	20	60	0	1	1	0	1	1	0	1	2	3	3	2	2	2	2	2	2	3	2	3	80	120	140	420	200	340	1.59	17.8
1	2	2	151	40	2012	6	1	1	2	40	3	30	4	30	20	0	0	0	0	0	0	0	1	2	1	2	2	1	2	2	2	2	2	1	3	80	90	120	140	170	290	1.51	17.54
1	2	2	157	46	2012	3	1	2	2	40	5	35	7	40	400	0	0	1	0	1	0	0	1	2	1	1	1	1	1	5	2	1	3	1	3	80	175	280	2800	255	535	1.57	18.66
1	2	2	164	50	2011	12	2	3	2	40	2	40	2	30	260	0	1	1	1	1	1	0	0	4	2	4	4	4	4	2	2	2	4	2	2	80	80	60	1820	160	220	1.64	18.59
1	2	2	155	72.5	2011	12	1	2	2	40	4	30	5	40	480	0	0	0	1	1	0	0	0	3	2	3	1	1	1	4	3	1	1	1	1	80	120	200	3360	200	400	1.55	30.18
1	2	2	140	56	2012	6	1	2	2	40	3	35	7	10	420	0	1	0	0	1	0	0	1	5	4	3	3	2	3	3	2	4	3	1	2	80	105	70	2940	185	255	1.4	28.57
1	2	2	150	68	2012	3	1	2	4	20	1	20	6	20	200	1	0	1	1	1	1	1	1	4	4	4	4	4	4	3	4	4	4	4	4	80	20	120	1400	100	220	1.5	30.22
1	2	2	155	46	2012	7	1	2	3	25	4	30	7	60	360	1	0	1	0	1	0	0	1	4	5	3	4	5	4	5	4	5	4	3	5	75	120	420	2520	195	615	1.55	19.15
1	2	2	161	47	2012	5	1	2	3	25	4	35	4	20	130	0	1	1	1	1	0	1	1	3	3	3	3	3	3	3	3	3	3	3	3	75	140	80	910	215	295	1.61	18.13
1	2	2	151	45	2012	1	1	2	2.5	30	2	20	4	10	30	0	0	1	1	0	0	0	1	2	2	2	4	3	4	3	2	2	3	2	4	75	40	40	210	115	155	1.51	19.74
1	2	2	146	64	2012	9	1	1	7	10	3	12	7	20	20	1	1	1	1	1	0	0	1	2	2	2	4	4	4	3	3	2	3	4	4	70	36	140	140	106	246	1.46	30.02
1	2	2	150	37	2012	9	1	1	3.5	17.5	5	30	7	40	600	0	0	0	0	0	0	0	0	4	2	3	3	4	3	2	2	2	3	3	4	61.25	150	280	4200	211.25	491.25	1.5	16.44
1	2	2	154	36	2011	11	1	2	2	30	2	60	3	30	480	0	1	1	1	1	0	1	1	4	3	4	5	3	4	3	2	3	3	3	5	60	120	90	3360	180	270	1.54	15.18
1	2	2	152	39	2011	11	1	2	2	30	2	42	7	40	420	0	1	1	0	1	0	0	1	2	3	4	3	1	3	2	1	1	3	2	2	60	84	280	2940	144	424	1.52	16.88
1	2	2	158	43	2011	12	1	2	2	30	2	20	1	35	360	0	0	0	1	1	0	0	1	3	2	2	3	2	3	2	2	2	3	2	2	60	40	35	2520	100	135	1.58	17.22
1	2	2	155	39	2013	2	1	2	2	30	3	30	7	20	250	1	1	1	1	1	0	1	1	3	2	4	3	3	4	3	2	2	4	3	3	60	90	140	1750	150	290	1.55	16.23
1	2	2	146	37	2012	6	1	2	2	30	2	20	7	40	160	1	0	0	0	1	1	1	1	5	2	2	5	4	5	2	1	2	2	1	5	60	40	280	1120	100	380	1.46	17.36
1	2	2	157	40	2012	2	1	2	3	20	2	20	6	20	260	0	0	1	0	1	0	1	1	3	3	3	3	3	3	2	3	3	3	3	4	60	40	120	1820	100	220	1.57	16.23
1	2	2	148	34	2012	8	1	2	3	20	2	20	6	20	260	0	1	1	1	1	1	0	1	3	3	3	4	3	3	2	4	2	4	4	4	60	40	120	1820	100	220	1.48	15.52
1	2	2	152	40	2012	2	1	3	4	15	7	15	5	20	40	0	0	1	0	0	0	0	1	5	1	2	5	1	3	1	1	1	1	4	3	60	105	100	280	165	265	1.52	17.31
1	2	2	150	35	2011	12	1	3	2	30	2	20	4	20	40	0	0	0	0	1	0	0	1	2	2	5	4	3	2	5	1	5	2	5	2	60	40	80	280	100	180	1.5	15.56
1	2	2	152	42	2011	12	1	2	2	30	4	45	7	40	350	0	0	0	0	0	0	0	1	3	1	3	5	4	3	3	1	2	5	4	5	60	180	280	2450	240	520	1.52	18.18
1	2	2	165	63	2011	11	1	2	4	15	3	15	2	30	360	0	1	0	1	1	1	0	1	4	2	2	5	3	1	2	1	2	5	5	2	60	45	60	2520	105	165	1.65	23.14
1	2	2	147	42	2012	3	1	2	3	20	3	30	7	20	230	0	0	1	1	0	1	1	1	4	4	2	3	4	2	2	1	2	3	2	4	60	90	140	1610	150	290	1.47	19.44
1	2	2	165	56	2012	12	1	3	2	30	3	40	7	20	40	0	1	1	0	1	0	1	1	1	2	1	2	3	1	2	1	2	2	1	4	60	120	140	280	180	320	1.65	20.57
1	2	2	150	54	2012	4	1	2	2	30	3	30	3	35	480	0	0	1	1	0	0	0	0	3	2	3	3	2	3	3	4	2	2	3	3	60	90	105	3360	150	255	1.5	24
1	2	2	164	67	2012	6	1	2	2	30	2	20	2	20	420	0	0	1	0	0	0	0	1	5	3	1	4	2	1	2	1	3	2	2	2	60	40	40	2940	100	140	1.64	24.91
1	2	2	144	68	2012	4	1	2	3	20	2	20	6	20	250	0	1	1	1	0	0	1	1	4	4	3	4	3	3	3	2	3	5	3	4	60	40	120	1750	100	220	1.44	32.79
1	2	2	154	39	2012	2	1	2	2	20	3	55	7	13.3	375	0	0	1	1	0	1	0	1	1	1	1	1	1	1	2	1	3	1	1	1	40	165	93.33	2625	205	298.33	1.54	16.44
1	2	2	147	35	2012	3	1	3	2	20	2	60	5	30	240	0	0	1	1	1	1	0	1	2	1	1	1	1	1	2	3	2	1	1	1	40	120	150	1680	160	310	1.47	16.2
1	2	2	148	35	2012	9	1	2	2	20	3	20	3	30	40	0	0	0	1	1	1	0	1	4	3	3	4	3	4	3	4	3	2	3	4	40	60	90	280	100	190	1.48	15.98
1	2	2	155	66	2011	10	1	2	2	20	4	45	7	40	50	1	1	0	0	0	0	0	0	3	3	4	5	4	5	3	2	3	5	4	3	40	180	280	350	220	500	1.55	27.47
1	2	2	150	64	2012	8	1	2	1.5	25	2	30	7	15	20	0	0	1	0	1	0	0	1	5	1	5	2	3	4	2	2	4	2	1	2	37.5	60	105	140	97.5	202.5	1.5	28.44
1	2	2	145	60	2012	7	1	2	1.5	25	5	15	2	20	420	1	0	0	1	1	1	0	1	3	1	3	2	1	3	1	1	2	1	2	3	37.5	75	40	2940	112.5	152.5	1.45	28.54
1	2	2	161	63	2012	4	1	2	2	15	5	30	7	40	420	0	0	0	0	1	1	0	1	3	4	2	3	2	2	2	2	2	2	3	3	30	150	280	2940	180	460	1.61	24.3
2	1	1	160	54	2013	2	1	1	3.5	45	5	30	7	30	200	0	1	1	1	1	1	1	1	3	4	2	4	3	2	3	3	3	4	4	3	157.5	150	210	1400	307.5	517.5	1.6	21.09
2	1	1	156	35	2012	9	1	2	5	30	3	60	5	20	486.7	0	1	1	0	1	0	0	1	5	4	4	5	5	4	3	4	5	3	3	4	150	180	100	3406.67	330	430	1.56	14.38
2	1	1	153	40	2012	5	1	3	5	30	5	10	7	30	240	0	0	0	1	0	0	0	1	1	1	1	1	1	1	1	1	1	1	1	1	150	50	210	1680	200	410	1.53	17.09
2	1	1	146	28	2012	10	1	2	5	30	2	30	5	30	60	0	0	1	1	1	1	0	1	3	2	3	3	3	5	3	3	4	1	2	3	150	60	150	420	210	360	1.46	13.14
2	1	1	158	51	2012	11	1	3	5	30	7	20	7	30	290	0	1	1	1	1	0	1	1	5	2	5	5	2	3	3	1	3	3	2	2	150	140	210	2030	290	500	1.58	20.43
2	1	1	149	45	2013	7	1	3	5	30	5	30	5	30	100	0	0	0	1	0	0	0	1	5	5	2	4	4	4	2	1	3	2	1	4	150	150	150	700	300	450	1.49	20.27
2	1	1	150	50	2013	4	1	3	3.7	40	2	30	2	60	15	0	0	0	0	0	0	1	1	4	4	1	4	4	1	4	3	4	4	4	4	146.67	60	120	105	206.67	326.67	1.5	22.22
2	1	1	160	46	2013	5	1	1	4.5	30	7	30	7	10	300	0	1	1	0	1	0	0	1	3	3	3	3	4	3	2	5	2	5	5	2	135	210	70	2100	345	415	1.6	17.97
2	1	1	138	40	2013	1	1	1	3	45	3	45	7	30	430	0	0	0	1	1	0	0	1	3	3	4	3	4	2	3	3	3	3	2	3	135	135	210	3010	270	480	1.38	21
2	1	1	149	60	2013	8	1	3	3	45	4	60	5	30	41	0	1	1	1	1	1	0	1	2	1	1	1	2	2	2	2	3	2	2	2	135	240	150	287	375	525	1.49	27.03
2	1	1	149	42	2011	11	1	3	5	25	5.5	42.5	5	20	21	1	1	1	1	0	0	0	1	4	3	4	3	4	4	4	4	5	3	4	4	125	233.75	100	147	358.75	458.75	1.49	18.92
2	1	1	140	36	2013	11	1	2	4	30	3.5	15	7	10	230	0	1	1	0	0	0	0	0	1	1	1	1	1	1	1	1	1	1	1	1	120	52.5	70	1610	172.5	242.5	1.4	18.37
2	1	1	142	38	2013	4	1	2	2	60	1	30	1	20	240	0	1	1	1	1	1	1	1	2	2	2	2	2	2	3	3	2	2	3	2	120	30	20	1680	150	170	1.42	18.85
2	1	1	153	50	2012	12	1	3	4	30	7	40	7	30	120	1	1	1	1	0	1	1	1	4	4	5	2	3	5	3	3	3	3	2	4	120	280	210	840	400	610	1.53	21.36
2	1	1	150	45	2013	7	1	2	2	60	4	70	5	20	20	1	1	0	0	1	1	0	1	5	5	5	5	5	5	1	2	2	5	2	3	120	280	100	140	400	500	1.5	20
2	1	1	140	33	2013	6	1	1	2.5	45	2	30	2	20	36.7	0	0	0	1	0	0	0	1	2	4	4	4	4	4	2	2	2	2	2	3	112.5	60	40	256.67	172.5	212.5	1.4	16.84
2	1	1	152	37	2012	10	1	2	2	56	4	69	6	26	150	0	1	1	0	0	0	0	1	3	4	3	2	2	3	1	1	2	2	3	4	112	276	156	1050	388	544	1.52	16.01
2	1	1	153	35	2012	9	1	1	3	36.7	1.67	33.3	6	27.5	340	0	1	1	0	0	1	0	1	3	2	2	1	1	1	2	2	4	1	1	1	110	55.56	165	2380	165.56	330.56	1.53	14.95
2	1	1	161	50.5	2012	10	1	1	5.5	20	5	15	1	10	15	0	0	0	0	0	0	0	0	2	2	3	1	1	3	2	2	3	1	1	2	110	75	10	105	185	195	1.61	19.48
2	1	1	156	57	2013	4	1	2	2	53	4	68	5	24	75	0	1	1	1	1	0	1	1	3	3	4	3	3	4	5	4	4	3	4	3	106	272	120	525	378	498	1.56	23.42
2	1	1	148	47	2012	12	1	1	3.5	30	3	15	7	12.5	20	0	0	1	1	0	0	0	1	4	3	2	3	2	2	2	2	3	1	2	2	105	45	87.5	140	150	237.5	1.48	21.46
2	1	1	137	24	2013	5	1	2	2	50	4	60	6	15	20	1	1	1	0	1	0	1	1	3	3	2	2	3	3	3	2	4	2	2	2	100	240	90	140	340	430	1.37	12.79
2	1	1	141	34	2013	3	1	3	4	25	2.5	25	3	15	20	0	0	1	0	0	0	0	0	5	3	5	3	2	4	2	4	2	2	2	2	100	62.5	45	140	162.5	207.5	1.41	17.1
2	1	1	150	34	2010	9	1	1	5	20	5	20	4	20	50	0	0	1	1	0	0	0	1	1	1	1	1	1	1	2	2	2	1	1	1	100	100	80	350	200	280	1.5	15.11
2	2	1	150	33	2011	11	1	3	4	30	5	30	5	10	40	0	0	0	0	1	0	0	1	2	2	2	2	2	2	3	2	2	2	3	2	120	150	50	280	270	320	1.5	14.67
2	2	1	145	36	2012	4	1	3	4	30	2	60	7	20	80	0	1	1	1	0	0	1	1	3	3	2	5	5	2	5	1	3	3	1	2	120	120	140	560	240	380	1.45	17.12
2	2	1	154	49	2011	12	1	2	3	40	3	70	3	120	620	0	0	1	0	1	0	1	1	3	3	3	4	4	5	3	4	2	2	3	5	120	210	360	4340	330	690	1.54	20.66
2	2	1	170	58	2011	11	1	2	3	40	1	25	7	55	480	0	1	1	1	1	0	0	1	3	3	3	3	4	3	3	2	3	3	3	3	120	25	385	3360	145	530	1.7	20.07
2	2	1	156	48	2012	1	1	3	3	40	5	60	7	70	230	1	1	1	1	1	1	1	1	4	3	4	4	4	4	4	4	5	3	3	3	120	300	490	1610	420	910	1.56	19.72
2	2	1	150	45	2012	3	1	3	3	40	4	60	7	60	230	1	1	1	1	1	1	1	1	4	3	4	4	4	4	4	4	5	3	3	3	120	240	420	1610	360	780	1.5	20
2	2	1	145	40	2012	6	1	3	3	40	4	60	7	60	230	1	1	1	1	1	1	1	1	4	3	4	4	4	4	4	4	5	3	3	3	120	240	420	1610	360	780	1.45	19.02
2	2	1	155	48	2012	7	1	3	3	40	4	60	7	60	230	1	1	1	1	1	1	1	1	4	3	4	4	4	4	4	4	5	3	3	3	120	240	420	1610	360	780	1.55	19.98
2	2	1	155	57	2012	8	1	3	3	40	4	60	7	60	230	1	1	1	1	1	1	1	1	4	3	4	4	4	4	4	4	5	3	3	3	120	240	420	1610	360	780	1.55	23.73
2	2	1	160	52	2012	8	1	3	3	40	4	60	7	60	230	1	1	1	1	1	1	1	1	4	3	4	4	4	4	4	4	5	3	3	3	120	240	420	1610	360	780	1.6	20.31
2	2	1	161	50	2011	9	1	3	3	40	4	60	7	60	230	1	1	1	1	1	1	1	1	4	3	4	4	4	4	4	4	5	3	3	3	120	240	420	1610	360	780	1.61	19.29
2	2	1	154	52	2011	10	1	3	3	40	4	60	7	60	230	1	1	1	1	1	1	1	1	4	3	4	4	4	4	4	4	5	3	3	3	120	240	420	1610	360	780	1.54	21.93
2	2	1	153	45	2011	11	1	3	3	40	4	60	7	60	230	1	1	1	1	1	1	1	1	4	3	4	4	4	4	4	4	5	3	3	3	120	240	420	1610	360	780	1.53	19.22
2	2	1	150	42	2012	12	1	2	2	60	2	60	2	60	270	1	1	1	1	1	1	1	1	5	5	5	5	5	5	5	5	4	5	5	5	120	120	120	1890	240	360	1.5	18.67
2	2	1	175	63	2010	9	1	2	4	30	5	40	4	25	350	1	1	0	1	0	1	0	1	3	2	2	3	4	2	3	1	3	1	1	2	120	200	100	2450	320	420	1.75	20.57
2	2	1	165	55	2010	11	1	2	2	60	2	20	7	30	260	0	1	0	0	0	0	0	1	2	2	2	3	2	2	3	2	2	2	2	1	120	40	210	1820	160	370	1.65	20.2
2	2	1	170	70	2011	8	1	2	4	30	6	40	7	20	300	1	1	1	1	1	0	0	0	3	2	2	3	3	3	4	2	2	2	2	3	120	240	140	2100	360	500	1.7	24.22
2	2	1	147	63	2012	7	1	3	3	40	4	60	7	60	230	1	1	1	1	1	1	1	1	4	3	4	4	4	4	4	4	5	3	3	3	120	240	420	1610	360	780	1.47	29.15
2	2	1	172	80	2011	12	1	3	3	40	4	60	7	60	230	1	1	1	1	1	1	1	1	4	3	4	4	4	4	4	4	5	3	3	3	120	240	420	1610	360	780	1.72	27.04
2	2	1	162	72	2011	12	1	3	3	40	4	60	7	60	230	1	1	1	1	1	1	1	1	4	3	4	4	4	4	4	4	5	3	3	3	120	240	420	1610	360	780	1.62	27.43
2	2	1	156	47	2011	12	1	2	3	35	4	20	7	10	30	0	1	1	0	1	1	0	1	4	5	3	4	4	3	3	2	3	4	3	4	105	80	70	210	185	255	1.56	19.31
2	2	1	165	80	2011	11	1	1	3	35	4	42	7	40	420	0	0	1	1	1	0	0	1	5	3	4	3	3	5	3	3	2	3	4	4	105	168	280	2940	273	553	1.65	29.38
2	2	1	154	32	2011	10	1	2	5	20	3	20	6	20	440	1	1	1	0	1	0	1	1	4	3	4	3	4	5	4	5	5	3	3	5	100	60	120	3080	160	280	1.54	13.49
2	2	1	150	30	2012	3	1	2	5	20	3	20	7	20	300	1	0	1	1	1	0	0	1	4	4	3	4	3	4	4	4	4	3	3	3	100	60	140	2100	160	300	1.5	13.33
2	2	1	150	35	2012	5	1	2	5	20	4	20	6	30	270	0	0	1	1	1	1	0	1	3	2	3	3	3	3	2	2	3	5	4	3	100	80	180	1890	180	360	1.5	15.56
2	1	2	167	52	2013	6	1	2	3.7	46.7	4.33	50	5	30	360	1	1	1	1	0	0	0	0	3	2	1	5	2	1	1	1	2	1	1	2	171.11	216.67	150	2520	387.78	537.78	1.67	18.65
2	1	2	151	43	2013	4	1	1	2	85	2	30	7	29	436.7	0	1	1	1	1	1	1	1	2	2	4	2	2	4	2	2	2	2	2	2	170	60	203	3056.67	230	433	1.51	18.86
2	1	2	161.6	41	2012	11	1	2	4	40	3	30	7	35	350	0	1	1	1	1	1	1	1	3	3	4	4	4	4	3	3	4	4	4	5	160	90	245	2450	250	495	1.62	15.7
2	1	2	145	32	2013	3	1	3	3	53.3	2	60	2	40	50	0	0	0	1	0	0	0	1	3	2	2	3	3	3	2	2	2	3	2	3	160	120	80	350	280	360	1.45	15.22
2	1	2	140	29	2013	6	1	1	5	30	2	30	7	25	400	0	0	1	0	1	0	0	1	2	2	2	1	1	2	2	1	2	2	2	2	150	60	175	2800	210	385	1.4	14.8
2	1	2	156	35	2013	2	1	2	3	50	4	65	5	25	145	1	1	1	1	1	1	1	0	5	4	5	5	4	5	3	4	5	2	5	5	150	260	125	1015	410	535	1.56	14.38
2	1	2	143	33	2013	3	1	3	5	30	5	40	4	30	140	1	1	1	1	1	1	0	1	4	4	3	3	3	3	4	4	3	4	4	4	150	200	120	980	350	470	1.43	16.14
2	1	2	166	47	2013	5	1	3	3	50	3	10	5	10	70	0	0	1	1	0	0	0	1	3	3	3	5	2	5	3	1	1	3	2	3	150	30	50	490	180	230	1.66	17.06
2	1	2	168	54	2012	10	1	1	6	25	2	15	2	12	16.7	0	0	1	1	0	0	0	0	2	1	3	2	1	3	2	2	1	1	1	1	150	30	24	116.67	180	204	1.68	19.13
2	1	2	156.5	38	2010	3.7	1	1	7	20	7	10	5.5	25	165	0	0	0	1	0	0	0	0	2	2	2	2	1	2	2	2	2	2	1	2	140	70	137.5	1155	210	347.5	1.57	15.52
2	1	2	150	35	2013	5	1	1	3	45	5	12	5	11	15	0	0	0	0	0	0	0	0	2	1	2	2	1	2	2	3	3	2	2	2	135	60	55	105	195	250	1.5	15.56
2	1	2	150	39	2012	12	1	2	3	45	3	10	2	30	40	0	0	1	1	1	1	1	1	1	1	1	4	1	5	1	1	1	5	5	3	135	30	60	280	165	225	1.5	17.33
2	1	2	154	48	2013	5	1	2	3	45	4	67	5	25	36	0	1	1	1	1	1	1	1	2	3	1	5	1	1	2	2	2	1	1	1	135	268	125	252	403	528	1.54	20.24
2	1	2	135	26	2013	10	1	1	3.7	36.7	2.33	13.5	7	30	533.3	0	0	0	0	0	0	0	1	3	5	4	3	2	4	1	2	2	3	1	4	134.44	31.5	210	3733.33	165.94	375.94	1.35	14.27
2	1	2	142	28	2013	11	1	1	3	40	2	30	7	30	510	0	0	1	1	1	1	0	0	1	2	1	1	1	2	1	1	1	1	1	1	120	60	210	3570	180	390	1.42	13.89
2	1	2	145	30	2013	3	1	2	2	60	5	70	7	30	80	0	1	1	0	1	0	0	1	3	5	5	5	5	5	4	5	2	5	5	5	120	350	210	560	470	680	1.45	14.27
2	1	2	155	59	2013	4	1	2	6	20	3	40	7	20	240	1	0	0	0	0	1	0	1	5	3	4	3	3	2	2	2	1	2	3	3	120	120	140	1680	240	380	1.55	24.56
2	1	2	140	34	2013	1	1	1	3	35	2	40	3	30	390	0	0	0	1	0	0	0	1	3	1	4	3	2	3	2	3	2	2	2	3	105	80	90	2730	185	275	1.4	17.35
2	1	2	145	35	2012	10	1	3	3.5	30	4.5	50	2	12	30	1	0	0	0	0	1	0	1	3	3	2	3	3	3	2	1	3	2	2	5	105	225	24	210	330	354	1.45	16.65
2	1	2	145	31	2013	9	1	1	3.5	30	2	30	1	30	80	0	0	1	0	0	0	0	1	1	1	1	1	1	2	1	2	2	1	2	1	105	60	30	560	165	195	1.45	14.74
2	1	2	145	40	2013	7	1	2	2	51	4	66	7	17	72	0	1	1	1	1	0	1	1	5	4	5	5	5	4	4	4	4	3	3	5	102	264	119	504	366	485	1.45	19.02
2	1	2	152	37	2013	5	1	1	4.5	22.5	4	15	7	20	455	0	0	1	0	0	0	0	0	2	1	1	2	1	1	3	3	3	2	2	3	101.25	60	140	3185	161.25	301.25	1.52	16.01
2	1	2	148	25	2013	7	1	2	2	50	5	65	6	36	80	1	0	1	1	1	0	1	1	5	4	4	5	5	4	4	4	4	2	5	5	100	325	216	560	425	641	1.48	11.41
2	1	2	129	26	2013	2	1	2	2	50	4	65	6	30	20	0	1	1	1	1	1	1	1	4	5	3	5	4	5	3	2	5	2	5	5	100	260	180	140	360	540	1.29	15.62
2	1	2	155	40	2013	7	1	2	2	50	4	65	6	25	60	0	1	1	1	1	0	0	1	4	3	3	5	4	3	3	2	5	2	3	3	100	260	150	420	360	510	1.55	16.65
2	1	2	153	30	2012	10	1	2	2	50	4	65	6	20	25	1	0	1	0	1	1	1	1	5	2	1	5	3	3	2	1	2	2	1	1	100	260	120	175	360	480	1.53	12.82
2	1	2	150	35	2013	1	1	2	2	50	4	60	7	30	20	0	0	1	1	0	0	1	1	3	3	5	3	3	5	2	2	3	3	3	5	100	240	210	140	340	550	1.5	15.56
2	1	2	155	36	2008	6.3	1	3	5	20	6	30	5	20	30	0	1	1	1	1	1	1	1	3	3	4	3	4	5	3	3	5	3	5	3	100	180	100	210	280	380	1.55	14.98
2	2	2	148	37	2012	8	1	2	3	40	2	25	7	20	500	0	0	1	1	1	1	1	1	4	3	4	4	4	5	3	2	3	5	5	4	120	50	140	3500	170	310	1.48	16.89
2	2	2	145	35	2012	1	1	3	3	40	4	60	7	60	230	1	1	1	1	1	1	1	1	4	3	4	4	4	4	4	4	5	3	3	3	120	240	420	1610	360	780	1.45	16.65
2	2	2	156	35	2012	1	1	3	3	40	4	60	7	60	230	1	1	1	1	1	1	1	1	4	3	4	4	4	4	4	4	5	3	3	3	120	240	420	1610	360	780	1.56	14.38
2	2	2	159	45	2012	2	1	3	3	40	4	60	7	60	230	1	1	1	1	1	1	1	1	4	3	4	4	4	4	4	4	5	3	3	3	120	240	420	1610	360	780	1.59	17.8
2	2	2	155	40	2012	2	1	3	3	40	4	60	7	60	230	1	1	1	1	1	1	1	1	4	3	4	4	4	4	4	4	5	3	3	3	120	240	420	1610	360	780	1.55	16.65
2	2	2	158	35	2012	2	1	3	3	40	4	60	7	60	230	1	1	1	1	1	1	1	1	4	3	4	4	4	4	4	4	5	3	3	3	120	240	420	1610	360	780	1.58	14.02
2	2	2	151	33	2012	3	1	3	3	40	4	60	7	60	230	1	1	1	1	1	1	1	1	4	3	4	4	4	4	4	4	5	3	3	3	120	240	420	1610	360	780	1.51	14.47
2	2	2	161	30	2012	3	1	3	3	40	4	60	7	60	230	1	1	1	1	1	1	1	1	4	3	4	4	4	4	4	4	5	3	3	3	120	240	420	1610	360	780	1.61	11.57
2	2	2	160	45	2012	4	1	3	3	40	4	60	7	60	230	1	1	1	1	1	1	1	1	4	3	4	4	4	4	4	4	5	3	3	3	120	240	420	1610	360	780	1.6	17.58
2	2	2	160	35	2012	4	1	3	3	40	4	60	7	60	230	1	1	1	1	1	1	1	1	4	3	4	4	4	4	4	4	5	3	3	3	120	240	420	1610	360	780	1.6	13.67
2	2	2	156	32	2012	4	1	3	3	40	4	60	7	60	230	1	1	1	1	1	1	1	1	4	3	4	4	4	4	4	4	5	3	3	3	120	240	420	1610	360	780	1.56	13.15
2	2	2	150	39	2012	5	1	3	3	40	4	60	7	60	230	1	1	1	1	1	1	1	1	4	3	4	4	4	4	4	4	5	3	3	3	120	240	420	1610	360	780	1.5	17.33
2	2	2	140	32	2012	6	1	3	3	40	4	60	7	60	230	1	1	1	1	1	1	1	1	4	3	4	4	4	4	4	4	5	3	3	3	120	240	420	1610	360	780	1.4	16.33
2	2	2	152	36	2011	10	1	3	3	40	4	60	7	60	230	1	1	1	1	1	1	1	1	4	3	4	4	4	4	4	4	5	3	3	3	120	240	420	1610	360	780	1.52	15.58
2	2	2	157	35	2011	10	1	3	3	40	4	60	7	60	230	1	1	1	1	1	1	1	1	4	3	4	4	4	4	4	4	5	3	3	3	120	240	420	1610	360	780	1.57	14.2
2	2	2	162	42	2011	12	1	3	3	40	4	60	7	60	230	1	1	1	1	1	1	1	1	4	3	4	4	4	4	4	4	5	3	3	3	120	240	420	1610	360	780	1.62	16
2	2	2	145	37	2012	6	1	2	4	30	5	27.5	2	20	220	1	0	0	1	1	1	1	1	2	3	4	2	3	3	3	4	3	2	1	3	120	137.5	40	1540	257.5	297.5	1.45	17.6
2	2	2	150	35	2012	9	1	2	4	30	6	10	6	20	260	0	0	0	0	1	0	0	1	2	1	2	3	1	2	2	1	2	2	2	2	120	60	120	1820	180	300	1.5	15.56
2	2	2	145	30	2012	3	1	3	4	30	3	35	7	15	40	0	1	1	1	1	1	0	1	3	3	3	4	2	2	2	2	2	2	2	3	120	105	105	280	225	330	1.45	14.27
2	2	2	152	33	2012	9	1	3	4	30	3	30	5	20	40	0	1	1	1	1	1	0	1	2	2	2	2	2	2	2	2	3	2	2	2	120	90	100	280	210	310	1.52	14.28
2	2	2	157	44	2012	7	1	2	4	30	3	25	5	120	20	0	0	1	1	1	0	0	1	5	1	5	5	3	5	5	5	5	5	5	5	120	75	600	140	195	795	1.57	17.85
2	2	2	160	42	2012	1	2	2	3	40	3	25	3	20	60	0	1	1	1	1	1	1	1	1	1	1	1	1	1	2	1	1	2	1	2	120	75	60	420	195	255	1.6	16.41
2	2	2	152	32	2011	11	1	2	4	30	3	20	6	30	120	0	0	1	1	1	1	1	0	4	5	4	4	3	3	4	4	5	3	4	4	120	60	180	840	180	360	1.52	13.85
2	2	2	168	53	2012	1	1	3	3	40	4	60	7	60	230	1	1	1	1	1	1	1	1	4	3	4	4	4	4	4	4	5	3	3	3	120	240	420	1610	360	780	1.68	18.78
2	2	2	145	45	2012	2	1	3	3	40	4	60	7	60	230	1	1	1	1	1	1	1	1	4	3	4	4	4	4	4	4	5	3	3	3	120	240	420	1610	360	780	1.45	21.4
2	2	2	160	55	2012	6	1	3	3	40	4	60	7	60	230	1	1	1	1	1	1	1	1	4	3	4	4	4	4	4	4	5	3	3	3	120	240	420	1610	360	780	1.6	21.48
2	2	2	143	37	2012	8	1	3	3	40	4	60	7	60	230	1	1	1	1	1	1	1	1	4	3	4	4	4	4	4	4	5	3	3	3	120	240	420	1610	360	780	1.43	18.09
2	2	2	160	50	2013	9	1	3	3	40	5	60	6	15	60	1	1	1	1	1	1	0	0	2	1	4	3	2	3	2	1	2	3	1	2	120	300	90	420	420	510	1.6	19.53
2	2	2	169	67	2012	9	1	3	4	30	4	40	7	100	110	0	0	0	1	1	0	1	1	5	1	1	5	1	1	1	1	1	1	1	1	120	160	700	770	280	980	1.69	23.46
2	2	2	155	46	2011	12	1	3	4	30	3	20	7	10	60	1	1	1	1	0	1	1	1	3	3	3	3	3	2	3	2	3	2	2	4	120	60	70	420	180	250	1.55	19.15
2	2	2	134	70	2012	4	1	3	3	40	4	60	7	60	230	1	1	1	1	1	1	1	1	4	3	4	4	4	4	4	4	5	3	3	3	120	240	420	1610	360	780	1.34	38.98
2	2	2	150	69	2011	7	1	3	5	23.3	2	60	2	26	20	0	1	1	1	1	1	0	1	2	2	2	2	2	3	4	2	2	3	2	2	116.67	120	52	140	236.67	288.67	1.5	30.67
2	2	2	153	60	2012	1	1	2	2	55	2	60	4	70	30	0	1	1	0	1	1	1	1	4	3	4	4	3	4	3	2	4	2	3	3	110	120	280	210	230	510	1.53	25.63
2	2	2	145	35	2012	4	1	3	3	35	6	20	7	20	40	1	0	0	0	0	0	0	1	3	2	4	2	1	3	2	1	2	1	2	2	105	120	140	280	225	365	1.45	16.65
2	2	2	154	40	2012	2	1	2	5	20	2	20	6	20	550	0	1	1	1	1	1	0	1	3	5	4	4	3	3	4	3	5	2	4	3	100	40	120	3850	140	260	1.54	16.87
2	2	2	150	35	2012	5	1	2	5	20	3	20	6	30	300	1	0	1	1	1	1	1	1	2	3	4	4	4	3	4	3	5	4	4	4	100	60	180	2100	160	340	1.5	15.56
2	2	2	155	40	2011	8	1	2	5	20	2	20	7	30	300	0	1	1	1	0	1	1	0	3	3	4	3	3	3	4	4	5	4	5	5	100	40	210	2100	140	350	1.55	16.65
2	2	2	158	40	2012	1	1	2	5	20	2	20	6	30	300	0	0	1	1	1	0	1	1	3	4	4	3	4	4	4	4	5	3	3	4	100	40	180	2100	140	320	1.58	16.02
2	2	2	157	35	2012	4	1	2	5	20	4	20	7	30	250	1	1	1	1	1	1	1	1	4	3	4	4	3	4	3	4	4	4	4	4	100	80	210	1750	180	390	1.57	14.2
2	2	2	150	35	2012	10	1	2	5	20	2	20	6	20	200	0	1	0	1	0	1	0	1	3	4	3	4	3	4	4	4	4	3	4	5	100	40	120	1400	140	260	1.5	15.56
2	2	2	150	32	2012	8	1	2	5	20	3	20	6	30	120	1	1	1	1	1	0	0	1	3	3	2	3	3	2	2	3	3	3	2	4	100	60	180	840	160	340	1.5	14.22
2	2	2	160	45	2012	12	1	2	2	11	6	15	3.5	30	200	0	0	1	1	1	0	0	1	3	2	3	2	2	3	2	1	2	2	2	3	22	90	105	1400	112	217	1.6	17.58
3	1	1	146	39.5	2012	9	1	3	2	50	4.5	30	5.5	25	160	0	0	1	1	1	0	0	1	5	5	3	5	5	5	3	3	5	5	5	3	100	135	137.5	1120	235	372.5	1.46	18.53
3	1	1	145	39	2013	2	1	2	2	50	5	70	7	40	80	0	1	1	1	1	0	1	1	5	3	5	3	2	4	2	2	5	2	3	4	100	350	280	560	450	730	1.45	18.55
3	1	1	146	50	2013	2	1	2	2	50	5	65	6.5	25	30	1	0	1	1	1	0	1	1	4	3	3	2	3	2	3	4	4	3	2	4	100	325	162.5	210	425	587.5	1.46	23.46
3	1	1	148	51	2013	11	1	2	2	50	4	65	6	29	120	0	1	1	1	1	1	1	1	5	3	5	5	5	3	1	2	3	5	3	4	100	260	174	840	360	534	1.48	23.28
3	1	1	143	45.5	2013	7	1	2	4	25	4.5	27.5	2	10	30	0	0	1	1	1	0	0	1	2	2	2	3	3	3	2	2	2	4	2	3	100	123.75	20	210	223.75	243.75	1.43	22.25
3	1	1	155	60	2013	3	1	2	2	50	4	68	6	15	27.5	0	1	0	0	0	0	0	1	3	1	1	5	1	1	1	1	2	3	3	1	100	272	90	192.5	372	462	1.55	24.97
3	1	1	150	54	2013	2	1	2	2	50	4	60	6	20	20	1	0	1	0	1	1	0	1	4	2	4	3	2	2	2	1	2	1	1	2	100	240	120	140	340	460	1.5	24
3	1	1	147	40	2013	1	1	2	2	48	5	68	6	25	65	1	0	0	0	1	1	1	1	5	4	3	3	4	4	3	3	4	3	3	5	96	340	150	455	436	586	1.47	18.51
3	1	1	155	50	2013	5	2	2	2	48	5	60	5	20	20	1	1	0	0	1	0	0	1	3	4	5	5	5	5	3	5	4	3	2	5	96	300	100	140	396	496	1.55	20.81
3	1	1	143	30	2013	3	1	3	3	30	3	40	7	30	400	1	0	0	1	0	1	0	0	5	2	1	1	1	1	3	2	3	1	1	2	90	120	210	2800	210	420	1.43	14.67
3	1	1	155	25	2012	11	1	2	2	45	5	69	6	30	106.7	1	0	1	0	1	0	0	1	3	2	3	3	2	3	2	2	2	2	2	2	90	345	180	746.67	435	615	1.55	10.41
3	1	1	151	41	2013	6	2	2	2	45	4	60	5	10	30	1	0	1	0	0	1	0	1	4	5	5	4	3	4	3	3	5	4	1	3	90	240	50	210	330	380	1.51	17.98
3	1	1	150	37	2012	8	1	2	3	30	3	30	5	10	40	0	0	1	0	0	0	0	1	3	2	3	3	2	3	2	3	3	1	2	2	90	90	50	280	180	230	1.5	16.44
3	1	1	156	54	2013	5	1	3	3	30	2.5	10	2	30	60	0	1	1	0	0	0	0	0	1	2	1	2	3	2	2	1	2	2	1	2	90	25	60	420	115	175	1.56	22.19
3	1	1	148	55	2012	11	1	3	3	30	1	20	3	10	30	0	1	0	1	1	1	0	1	3	2	3	3	3	3	3	3	2	3	3	3	90	20	30	210	110	140	1.48	25.11
3	1	1	150	30	2013	2	1	3	4	20	5	55	2	25	20	1	0	1	0	0	0	0	1	2	1	3	2	2	2	1	1	1	4	4	2	80	275	50	140	355	405	1.5	13.33
3	1	1	149	53	2013	3	1	3	2	40	2.5	45	7	45	280	0	0	0	0	0	0	0	1	2	2	1	2	2	2	2	1	2	2	1	1	80	112.5	315	1960	192.5	507.5	1.49	23.87
3	1	1	145	35	2012	1	1	3	2	37.5	1.67	10.7	3	20	600	0	0	0	0	0	0	0	0	1	1	5	5	1	1	1	1	1	2	1	1	75	17.78	60	4200	92.78	152.78	1.45	16.55
3	1	1	146	46	2013	3	1	1	7	10	7	11	7	15	40	0	0	1	1	1	0	0	1	2	2	2	1	2	2	3	2	2	2	2	2	70	77	105	280	147	252	1.46	21.58
3	1	1	160	52	2012	10	1	2	1	70	2	17	1	17	60	0	0	1	1	0	0	0	1	2	1	1	2	1	1	1	1	2	1	2	1	70	34	17	420	104	121	1.6	20.12
3	1	1	161	50	2013	5	1	3	5	13	7	15	2	13	30	0	1	1	1	1	0	0	1	1	5	5	2	2	2	1	5	1	1	5	1	65	105	26	210	170	196	1.61	19.29
3	1	1	150	39	2013	4	1	2	1	60	5	70	6	30	24	1	0	0	1	1	1	1	1	2	1	5	2	3	2	2	1	2	5	2	2	60	350	180	168	410	590	1.5	17.33
3	1	1	152	43	2012	5	1	3	2	30	4	40	7	30	120	1	1	1	1	1	1	1	1	4	4	4	4	4	4	4	4	4	1	1	2	60	160	210	840	220	430	1.52	18.61
3	2	1	147	40	2012	6	1	2	4.5	45	2	120	2	15	660	1	1	1	1	1	1	0	1	3	4	3	3	4	3	5	2	3	2	2	2	202.5	240	30	4620	442.5	472.5	1.47	18.51
3	2	1	155	40	2012	6	1	3	4	50	2	40	7	30	60	1	1	1	1	0	0	0	1	3	2	2	3	2	2	2	3	2	1	3	2	200	80	210	420	280	490	1.55	16.65
3	2	1	163	62	2012	7	1	3	5	40	5	15	7	10	120	0	1	1	0	0	0	0	1	2	2	2	2	2	3	1	1	2	5	5	1	200	75	70	840	275	345	1.63	23.34
3	2	1	150	50	2012	5	1	2	4	48.3	2	10	3	15	20	0	0	0	0	0	0	0	1	3	1	3	3	1	4	2	3	2	2	3	4	193.33	20	45	140	213.33	258.33	1.5	22.22
3	2	1	158	36	2012	1	1	2	6.3	30	3	20	4.7	20	240	0	1	0	1	0	1	0	1	2	1	3	3	2	3	3	3	1	3	2	2	190	60	93.33	1680	250	343.33	1.58	14.42
3	2	1	165	40	2012	1	1	1	3	60	4	17	2	10	30	0	1	1	1	0	0	1	0	2	1	3	2	2	3	3	2	2	1	1	1	180	68	20	210	248	268	1.65	14.69
3	2	1	147	47	2012	5	1	2	3	60	3.5	25	7	22.5	600	0	0	0	1	1	1	1	1	5	4	5	5	5	5	4	1	5	4	3	3	180	87.5	157.5	4200	267.5	425	1.47	21.75
3	2	1	145	42	2012	7	1	2	2	90	4.33	60	7	10	373.3	1	0	0	0	0	0	0	1	3	1	2	5	3	5	3	5	4	3	5	2	180	260	70	2613.33	440	510	1.45	19.98
3	2	1	150	36	2012	2	1	1	5	35	2	40	5	10	15	0	0	1	0	0	0	0	1	3	2	1	4	3	5	2	1	1	2	2	1	175	80	50	105	255	305	1.5	16
3	2	1	163	51	2011	10	1	2	3.5	50	3	35	2	20	30	0	0	1	0	0	1	0	1	1	1	1	3	2	3	2	1	1	1	1	1	175	105	40	210	280	320	1.63	19.2
3	2	1	155	49	2012	1	1	2	2	80	3	40	5	50	400	1	0	1	0	0	1	0	1	1	2	3	3	2	3	2	1	1	5	2	4	160	120	250	2800	280	530	1.55	20.4
3	2	1	147	40	2012	9	1	2	4	40	3	20	6	30	260	1	1	1	1	1	0	1	1	4	3	3	3	3	3	4	4	4	3	4	3	160	60	180	1820	220	400	1.47	18.51
3	2	1	166.5	54	2012	1	1	2	3.5	45	2	30	2	15	225	0	0	1	0	0	0	0	1	1	2	1	2	1	1	1	1	2	1	1	1	157.5	60	30	1575	217.5	247.5	1.67	19.48
3	2	1	150	40	2012	5	1	2	5	30	5	60	7	60	400	0	0	1	1	0	1	1	1	3	2	3	5	5	2	5	5	5	2	5	5	150	300	420	2800	450	870	1.5	17.78
3	2	1	152	35	2012	9	1	2	5	30	3	20	6	20	200	0	0	1	1	1	1	0	1	3	2	2	3	2	3	2	3	3	3	2	3	150	60	120	1400	210	330	1.52	15.15
3	2	1	155	38	2012	2	1	3	5	30	7	30	7	15	60	1	0	1	1	1	1	0	1	4	3	4	5	5	4	2	2	3	4	2	3	150	210	105	420	360	465	1.55	15.82
3	2	1	150	42	2012	7	1	2	5	30	3	20	7	30	200	0	1	0	1	1	1	1	1	1	3	4	5	5	3	2	2	2	5	5	5	150	60	210	1400	210	420	1.5	18.67
3	2	1	150	54	2012	4	1	2	5	30	2	40	7	30	180	0	0	1	1	1	1	1	1	3	2	5	3	2	4	3	3	4	3	3	3	150	80	210	1260	230	440	1.5	24
3	2	1	162	63	2012	4	1	3	5	30	7	20	3	10	70	1	1	1	1	1	1	0	1	2	2	2	3	1	1	4	1	2	1	1	1	150	140	30	490	290	320	1.62	24.01
3	2	1	165	40	2011	11	1	1	4	36.7	1	30	3	20	30	0	0	1	1	0	0	0	0	1	1	1	1	1	1	1	3	1	1	1	1	146.67	30	60	210	176.67	236.67	1.65	14.69
3	2	1	155	55	2012	2	1	3	3	45	2	120	3	20	530	0	1	1	1	1	1	0	1	1	1	3	2	1	2	1	1	2	3	2	2	135	240	60	3710	375	435	1.55	22.89
3	2	1	147	44	2012	2	1	3	4.5	30	4	10	7	10	305	0	1	0	0	0	0	1	1	3	2	3	2	2	2	2	2	2	2	3	2	135	40	70	2135	175	245	1.47	20.36
3	2	1	164	47	2011	10	1	2	2	60	4	40	4	60	480	0	1	1	0	1	1	1	1	5	4	5	3	4	3	4	5	4	3	3	3	120	160	240	3360	280	520	1.64	17.47
3	2	1	165	41	2012	7	1	2	3	40	4	60	2	30	400	1	0	1	0	1	0	0	1	2	1	3	3	1	2	2	1	2	3	3	1	120	240	60	2800	360	420	1.65	15.06
3	2	1	141	30	2012	3	1	2	3	40	7	40	7	30	240	0	0	1	0	0	0	0	0	1	1	3	1	1	3	2	1	3	1	1	1	120	280	210	1680	400	610	1.41	15.09
3	2	1	154	42	2012	1	1	3	3	40	4	60	7	60	230	0	1	1	1	1	1	1	1	4	3	4	4	4	4	4	4	5	3	3	3	120	240	420	1610	360	780	1.54	17.71
3	2	1	153	40	2012	1	1	3	3	40	4	60	7	60	230	1	1	1	1	1	1	1	1	4	3	4	4	4	4	4	4	5	3	3	3	120	240	420	1610	360	780	1.53	17.09
3	2	1	147	31	2012	2	1	3	3	40	4	60	7	60	230	1	1	1	1	1	1	1	1	4	3	4	4	4	4	4	4	5	3	3	3	120	240	420	1610	360	780	1.47	14.35
3	2	1	150	40	2012	3	1	3	3	40	4	60	7	60	230	1	1	1	1	1	1	1	1	4	3	4	4	4	4	4	4	5	3	3	3	120	240	420	1610	360	780	1.5	17.78
3	2	1	158	40	2011	3	1	3	3	40	4	60	7	60	230	1	1	1	1	1	1	1	1	4	3	4	4	4	4	4	4	5	3	3	3	120	240	420	1610	360	780	1.58	16.02
3	2	1	142	31	2012	7	1	3	3	40	4	60	7	60	230	1	1	1	1	1	1	1	1	4	3	4	4	4	4	4	4	5	3	3	3	120	240	420	1610	360	780	1.42	15.37
3	2	1	165	45	2012	8	1	3	3	40	4	60	7	60	230	1	1	1	1	1	1	1	1	4	3	4	4	4	4	4	4	5	3	3	3	120	240	420	1610	360	780	1.65	16.53
3	2	1	160	41	2012	9	1	3	3	40	4	60	7	60	230	1	1	1	1	1	1	1	1	4	3	4	4	4	4	4	4	5	3	3	3	120	240	420	1610	360	780	1.6	16.02
3	2	1	157	43	2012	2	1	2	1	120	3	25	2	40	280	0	0	1	1	0	0	0	1	3	4	3	2	3	2	2	3	4	1	1	1	120	75	80	1960	195	275	1.57	17.44
3	2	1	160	41	2012	4	1	3	2	60	2	80	3	30	20	1	0	1	0	0	0	0	1	4	3	5	4	4	4	5	4	3	3	3	3	120	160	90	140	280	370	1.6	16.02
3	2	1	161	50	2012	2	1	2	5	20	4	20	7	20	350	0	0	1	1	0	0	1	1	4	4	4	4	4	2	4	4	4	4	4	4	100	80	140	2450	180	320	1.61	19.29
3	2	1	150	48	2012	1	1	2	5	20	2	20	7	30	400	0	0	1	0	1	1	1	1	3	3	4	4	4	3	4	3	4	4	3	4	100	40	210	2800	140	350	1.5	21.33
3	2	1	164	52	2011	1	1	2	5	20	3	20	7	30	260	0	1	1	1	1	1	0	1	2	3	4	3	3	3	4	4	5	4	4	5	100	60	210	1820	160	370	1.64	19.33
3	2	1	147	40	2012	3	1	2	5	20	3	40	7	20	60	1	1	1	1	1	1	1	1	5	3	4	4	5	4	4	3	4	3	3	3	100	120	140	420	220	360	1.47	18.51
3	2	1	159	40	2011	10	1	3	3	30	4	60	7	20	60	0	1	0	1	1	0	1	1	3	2	2	3	1	3	3	2	3	3	2	2	90	240	140	420	330	470	1.59	15.82
3	2	1	140	30	2012	9	1	2	3	30	4	30	7	30	60	0	0	0	0	0	0	0	1	1	1	1	1	1	1	1	1	1	1	1	1	90	120	210	420	210	420	1.4	15.31
3	1	2	140	36	2013	2	1	3	4	25	3	20	7	25	210	0	0	1	1	0	0	0	1	3	2	5	5	2	5	5	5	2	2	1	1	100	60	175	1470	160	335	1.4	18.37
3	1	2	150	45	2013	5	1	2	2	50	4	65	5	15	120	1	0	1	1	1	1	1	1	4	2	5	4	2	5	3	4	4	2	3	5	100	260	75	840	360	435	1.5	20
3	1	2	140	40	2013	7	1	2	2	50	4	60	6	20	120	1	0	1	1	1	0	0	1	4	2	3	4	2	4	2	2	2	5	2	3	100	240	120	840	340	460	1.4	20.41
3	1	2	145	35	2013	4	2	2	2	49	5	63	6	20	70	1	1	1	0	1	1	0	1	5	4	5	3	4	5	2	4	3	5	5	5	98	315	120	490	413	533	1.45	16.65
3	1	2	156	39	2013	1	1	2	2	47	4	64	6	30	40	0	0	0	0	0	1	1	1	2	4	4	2	3	5	3	2	5	3	3	4	94	256	180	280	350	530	1.56	16.03
3	1	2	141	62	2013	5	1	2	2	47	4	62	6	30	24	0	1	0	1	0	1	0	1	2	3	4	1	4	4	2	3	2	2	2	4	94	248	180	168	342	522	1.41	31.19
3	1	2	140	35	2013	5	1	2	2	45	4	60	7	30	25	0	0	1	1	1	0	1	1	3	2	3	4	3	2	2	2	3	3	3	4	90	240	210	175	330	540	1.4	17.86
3	1	2	159	45	2012	10	1	1	4	22.5	5	10	5	10	50	0	0	1	0	0	0	0	1	2	1	1	1	1	1	4	2	1	1	1	1	90	50	50	350	140	190	1.59	17.8
3	1	2	152	45	2013	4	1	3	3	30	3.5	40	7	42	315	0	0	1	0	0	0	0	1	5	2	4	5	2	3	1	1	3	2	3	2	90	140	294	2205	230	524	1.52	19.48
3	1	2	154	44	2013	1	1	3	3	30	2	30	5	15	420	0	0	1	1	1	0	0	1	3	2	1	1	3	1	3	3	3	3	3	3	90	60	75	2940	150	225	1.54	18.55
3	1	2	153	50	2013	6	1	2	3	30	4	30	5	20	210	0	0	1	1	0	1	0	1	5	5	5	5	5	1	3	2	5	5	5	5	90	120	100	1470	210	310	1.53	21.36
3	1	2	158	46	2013	2	1	3	3	30	6	25	7	40	40	0	0	1	1	1	0	0	1	4	3	2	4	3	3	1	1	2	2	2	3	90	150	280	280	240	520	1.58	18.43
3	1	2	160	50	2012	9	1	3	3	30	2	30	2	40	30	0	0	0	1	1	1	1	0	3	4	4	4	5	5	5	2	5	5	5	5	90	60	80	210	150	230	1.6	19.53
3	1	2	153	42	2012	9	1	1	3.5	25	2	30	7	28	370	0	1	1	1	1	0	0	1	1	2	1	1	1	2	3	2	2	1	1	1	87.5	60	196	2590	147.5	343.5	1.53	17.94
3	1	2	155	33	2013	3	1	3	3.5	25	4	20	6	17.5	30	0	1	1	0	0	0	0	1	1	1	4	5	1	3	2	2	4	1	2	5	87.5	80	105	210	167.5	272.5	1.55	13.74
3	1	2	140	29	2011	7	1	1	4	20	2	30	7	12	350	1	0	1	1	1	1	1	1	2	4	5	3	5	3	3	2	5	3	4	5	80	60	84	2450	140	224	1.4	14.8
3	1	2	161	35	2012	9	1	3	4	20	4	45	5	20	125	0	1	0	0	1	1	1	1	2	3	3	3	3	4	1	2	5	2	4	5	80	180	100	875	260	360	1.61	13.5
3	1	2	152	40	2012	10	1	1	4	20	5	15	5	10	50	0	0	1	0	0	0	0	0	3	1	2	3	2	3	2	2	2	2	2	3	80	75	50	350	155	205	1.52	17.31
3	1	2	140	26	2013	6	1	3	4	20	3	20	5	20	60	0	0	1	1	1	1	1	1	3	3	4	3	4	3	3	3	4	3	2	4	80	60	100	420	140	240	1.4	13.27
3	1	2	170	60	2013	9	1	1	7	10	7	25	4.5	20	37.5	0	0	0	1	0	0	0	0	1	1	1	1	1	1	1	1	1	1	1	1	70	175	90	262.5	245	335	1.7	20.76
3	1	2	156	45	2012	8	1	3	2.5	25	5	30	2	60	15	0	1	1	1	1	0	0	1	1	1	2	3	3	3	4	1	1	3	2	3	62.5	150	120	105	212.5	332.5	1.56	18.49
3	1	2	139	36	2013	3	1	3	2.5	25	4	25	6	25	115	0	0	1	1	0	1	0	1	2	1	1	1	1	1	2	3	2	1	3	1	62.5	100	150	805	162.5	312.5	1.39	18.63
3	1	2	151	33	2012	2	1	3	2	30	5	40	4	40	290	0	1	1	1	0	1	0	1	3	2	3	3	2	2	2	1	4	2	2	3	60	200	160	2030	260	420	1.51	14.47
3	1	2	147	33	2012	11	1	2	2	30	5	30	7	20	300	0	0	1	1	0	1	0	0	3	2	3	3	4	5	3	2	3	3	3	5	60	150	140	2100	210	350	1.47	15.27
3	1	2	150	33	2013	3	2	2	1	60	5	60	7	35	38	0	1	1	1	1	0	0	1	3	4	4	3	2	3	5	5	4	4	3	5	60	300	245	266	360	605	1.5	14.67
3	1	2	150	31	2013	3	1	3	1.5	40	2.5	50	5	14	30	1	0	1	0	0	0	0	0	3	2	3	3	4	3	2	2	2	1	2	1	60	125	70	210	185	255	1.5	13.78
3	2	2	156	40	2012	5	1	3	4.5	45	3	30	7	40	378	0	1	1	0	1	0	0	1	5	3	4	5	3	4	3	2	2	4	4	4	202.5	90	280	2646	292.5	572.5	1.56	16.44
3	2	2	166	59	2011	11	1	2	4	50	3	20	4	40	420	0	0	0	0	0	0	0	0	1	1	1	2	1	1	2	1	1	2	1	2	200	60	160	2940	260	420	1.66	21.41
3	2	2	162.5	45	2012	9	1	3	5	40	2	15	1	10	340	0	1	1	1	1	1	0	1	3	3	1	4	4	2	4	1	2	4	2	3	200	30	10	2380	230	240	1.63	17.04
3	2	2	158	39	2011	10	1	2	4	50	3	20	7	20	15	0	0	1	1	1	1	0	0	5	5	4	4	3	5	4	3	5	3	5	5	200	60	140	105	260	400	1.58	15.62
3	2	2	155	38	2012	2	1	2	4	46.7	2	40	2	20	420	0	0	1	1	0	0	0	1	1	1	1	3	2	1	1	1	2	2	1	2	186.67	80	40	2940	266.67	306.67	1.55	15.82
3	2	2	169	45	2012	1	1	2	4	45	5	25	7	10	180	0	0	0	0	1	1	0	1	2	1	2	2	2	2	2	1	1	1	1	1	180	125	70	1260	305	375	1.69	15.76
3	2	2	146	36	2012	12	1	2	4.5	40	1	30	5.5	40	210	0	0	1	1	1	1	0	1	4	3	3	4	3	3	2	2	3	2	2	3	180	30	220	1470	210	430	1.46	16.89
3	2	2	150	36	2012	12	1	1	4	45	2	30	7	30	15	0	0	0	1	0	0	0	1	1	1	1	1	1	1	1	1	1	1	1	1	180	60	210	105	240	450	1.5	16
3	2	2	160	55	2012	2	1	2	2	90	1	30	7	20	210	0	0	0	0	1	1	1	1	5	3	2	3	2	2	5	5	5	5	5	3	180	30	140	1470	210	350	1.6	21.48
3	2	2	145	33	2012	7	1	1	5.5	30	5	25	7	20	15	0	0	1	1	0	1	0	0	1	2	2	1	1	1	2	2	2	1	2	2	165	125	140	105	290	430	1.45	15.7
3	2	2	150	38	2012	9	1	2	4	40	3	30	5	50	220	1	1	0	1	1	1	0	1	3	3	5	5	4	5	4	4	3	3	4	3	160	90	250	1540	250	500	1.5	16.89
3	2	2	156	36	2012	5	1	3	4	40	2	30	7	25	40	1	1	1	1	1	1	0	1	5	4	5	5	5	5	2	2	3	5	5	5	160	60	175	280	220	395	1.56	14.79
3	2	2	160	56.5	2011	10	2	3	4	40	2	20	5	10	350	0	1	1	1	0	1	0	1	3	2	3	4	3	4	2	1	2	3	3	3	160	40	50	2450	200	250	1.6	22.07
3	2	2	154	43	2011	7	1	2	5.7	26.7	4	30	2	45	420	0	0	1	1	0	0	0	0	1	1	1	1	1	1	2	2	2	1	1	2	151.11	120	90	2940	271.11	361.11	1.54	18.13
3	2	2	152	37	2011	10	1	2	5	30	4.5	30	5	75	365	1	0	1	1	1	1	1	0	5	4	5	4	3	5	3	2	4	3	2	4	150	135	375	2555	285	660	1.52	16.01
3	2	2	152	27	2012	7	1	3	5	30	3	40	7	30	150	1	1	1	1	1	0	1	1	5	4	5	4	4	5	2	3	5	4	4	5	150	120	210	1050	270	480	1.52	11.69
3	2	2	144	28	2012	2	1	2	5	30	2	30	2	30	240	0	0	1	1	1	0	0	0	2	2	2	2	2	2	3	2	2	2	2	2	150	60	60	1680	210	270	1.44	13.5
3	2	2	170	45	2011	10	1	3	5	30	5	30	7	20	40	1	0	1	1	1	1	1	1	3	2	1	2	2	3	2	2	2	3	2	2	150	150	140	280	300	440	1.7	15.57
3	2	2	155	40	2012	4	2	3	5	30	2	30	7	30	60	1	0	1	1	1	1	0	1	3	1	1	5	5	5	1	1	2	1	1	2	150	60	210	420	210	420	1.55	16.65
3	2	2	163	44	2012	1	1	3	5	30	2	20	4	10	110	1	1	1	1	1	1	0	1	3	3	3	3	3	3	2	2	3	3	3	2	150	40	40	770	190	230	1.63	16.56
3	2	2	158	45	2011	12	1	2	5	30	5	50	5	20	370	1	1	1	1	0	0	0	1	3	1	1	1	1	1	3	1	4	3	1	3	150	250	100	2590	400	500	1.58	18.03
3	2	2	153	45	2011	12	1	2	5	30	7	20	7	30	420	1	0	1	1	0	1	0	1	4	3	5	4	4	4	4	2	3	5	3	5	150	140	210	2940	290	500	1.53	19.22
3	2	2	159	50	2012	1	1	2	5	30	3	20	6	20	200	0	1	1	1	0	0	0	1	3	2	2	3	3	2	2	3	3	3	3	3	150	60	120	1400	210	330	1.59	19.78
3	2	2	161	47	2012	8	1	3	1	150	2	80	5	150	120	1	1	0	1	0	1	0	1	3	2	4	1	1	1	3	2	3	1	1	1	150	160	750	840	310	1060	1.61	18.13
3	2	2	151	55	2012	3	1	3	5	30	7	20	2	30	120	0	1	1	1	0	1	0	0	2	3	1	2	4	2	2	2	2	3	2	2	150	140	60	840	290	350	1.51	24.12
3	2	2	160	42	2011	10	1	3	3.5	40	1	30	3.5	50	25	0	0	0	0	0	0	0	1	2	2	1	1	1	1	1	2	2	3	2	2	140	30	175	175	170	345	1.6	16.41
3	2	2	150	43	2012	3	1	3	5	27	2	20	7	30	70	0	0	1	1	1	0	0	1	3	2	3	3	2	2	4	3	3	2	2	3	135	40	210	490	175	385	1.5	19.11
3	2	2	156	48	2010	12	1	2	4.5	30	2	20	5	60	120	0	0	1	1	0	0	0	1	3	3	3	2	1	1	2	1	2	1	2	2	135	40	300	840	175	475	1.56	19.72
3	2	2	161	49	2012	2	1	2	3.5	35	5	30	7	20	480	0	0	1	1	1	0	0	1	1	1	1	1	1	1	3	2	1	5	4	1	122.5	150	140	3360	272.5	412.5	1.61	18.9
3	2	2	167	46	2011	11	1	2	5	20	3	20	6	30	120	0	1	1	1	0	0	0	1	2	3	3	3	3	2	2	3	3	4	3	3	100	60	180	840	160	340	1.67	16.49
3	2	2	136	25	2012	12	1	2	5	20	2	20	7	20	120	1	1	1	1	1	1	1	1	3	3	3	4	3	4	3	3	4	3	3	4	100	40	140	840	140	280	1.36	13.52
3	2	2	145	45	2012	9	1	2	5	20	2	20	6	30	300	1	0	1	1	1	1	0	1	3	4	3	4	4	3	4	3	4	4	3	3	100	40	180	2100	140	320	1.45	21.4
3	2	2	146	44	2012	4	1	2	5	20	2	20	6	20	200	1	1	1	1	1	1	1	1	4	4	3	4	4	3	3	3	3	3	4	4	100	40	120	1400	140	260	1.46	20.64
3	2	2	154	47	2012	8	1	2	5	20	2	20	6	20	200	0	1	1	1	0	0	1	1	3	3	3	3	3	2	3	2	2	2	2	3	100	40	120	1400	140	260	1.54	19.82
3	2	2	160	42	2011	12	1	2	4	24	3	23	7	12	30	0	0	0	0	0	0	1	1	3	2	4	3	3	3	4	3	3	3	4	3	96	69	84	210	165	249	1.6	16.41
3	2	2	157	39	2012	1	1	2	2.5	36.5	2	30	5.5	27	20	1	0	1	1	0	0	0	1	3	3	3	3	3	3	2	3	3	3	2	2	91.25	60	148.5	140	151.25	299.75	1.57	15.82
3	2	2	146	33	2012	10	1	2	3	30	2	35	5	25	500	1	1	1	1	1	1	1	1	3	2	3	3	3	3	3	3	2	2	2	2	90	70	125	3500	160	285	1.46	15.48
3	2	2	156	39	2012	2	1	2	1	20	4	20	7	60	320	0	1	0	1	0	0	0	1	2	2	1	3	2	2	2	1	2	3	2	4	20	80	420	2240	100	520	1.56	16.03
4	1	1	158	42	2012	9	1	1	3	75	4	45	7	45	660	1	1	1	1	1	0	0	0	4	4	3	4	3	2	3	4	5	3	4	4	225	180	315	4620	405	720	1.58	16.82
4	1	1	145	36	2013	8	1	3	5	40	5	30	7	15	20	1	1	0	0	1	1	1	1	5	5	5	5	5	5	5	5	5	5	5	4	200	150	105	140	350	455	1.45	17.12
4	1	1	140	32	2012	11	1	1	5	40	2	11	2	11	40	0	0	0	0	0	0	0	1	3	2	1	1	1	1	3	2	3	1	1	2	200	22	22	280	222	244	1.4	16.33
4	1	1	152	60.5	2012	5	1	2	1.5	127.5	5	15	3	25	390	0	0	1	1	0	0	1	1	3	5	4	3	4	2	2	2	2	4	4	2	191.25	75	75	2730	266.25	341.25	1.52	26.19
4	1	1	139	30	2012	10	1	1	4	45	3	30	5	20	40	0	0	0	0	0	0	0	1	1	1	2	2	2	2	1	1	2	2	2	2	180	90	100	280	270	370	1.39	15.53
4	1	1	171.5	73.5	2006	10	1	1	2.5	70	2.5	45	2	50	180	0	0	1	0	0	0	0	1	2	1	1	3	3	3	3	3	1	3	1	1	175	112.5	100	1260	287.5	387.5	1.72	24.99
4	1	1	145	45	2012	11	1	3	3	20	5	30	5	30	30	0	1	1	1	1	1	1	1	3	2	3	3	2	3	2	2	2	2	2	2	60	150	150	210	210	360	1.45	21.4
4	1	1	151	50	2013	3	1	1	2	30	2	60	3	35	30	0	1	1	1	1	1	0	1	1	1	1	5	5	5	2	1	2	5	5	5	60	120	105	210	180	285	1.51	21.93
4	1	1	136	35	2007	5	1	1	4	15	3	30	7	30	200	0	0	1	0	0	0	0	0	1	1	1	1	1	1	1	1	1	1	1	1	60	90	210	1400	150	360	1.36	18.92
4	1	1	160	62	2012	10	1	1	2	30	5	60	2	60	120	1	0	0	0	0	1	0	1	2	2	2	2	2	2	2	2	2	2	2	2	60	300	120	840	360	480	1.6	24.22
4	1	1	153	42	2012	11	1	1	1	50	5	10	3	10	373.3	0	0	1	0	0	0	0	1	4	2	4	4	4	4	3	2	3	4	3	4	50	50	30	2613.33	100	130	1.53	17.94
4	1	1	150	38	2012	11	1	2	1	48	5	65	6	20	70	0	0	1	1	0	1	1	1	1	2	2	2	1	2	2	2	2	2	1	2	48	325	120	490	373	493	1.5	16.89
4	1	1	151	39	2012	12	1	2	1	40	3	50	1	20	300	0	1	0	0	1	1	0	1	2	2	1	2	1	1	1	3	2	1	1	2	40	150	20	2100	190	210	1.51	17.1
4	1	1	150	40	2012	11	1	3	1	40	2	60	4	30	400	0	1	0	1	0	0	0	1	3	4	5	3	2	1	2	4	4	2	5	4	40	120	120	2800	160	280	1.5	17.78
4	1	1	141	38	2013	2	1	3	2	20	5	55	7	20	230	0	1	1	1	0	1	0	0	2	1	1	1	1	1	4	4	1	1	1	1	40	275	140	1610	315	455	1.41	19.11
4	1	1	155	48	2013	7	1	2	2	20	4.5	35	5	30	40	0	1	1	1	1	0	0	1	3	2	3	2	2	2	2	2	2	2	1	3	40	157.5	150	280	197.5	347.5	1.55	19.98
4	1	1	146	45	2013	4	1	3	1	30	3	60	7	40	400	0	1	1	1	1	0	1	1	4	5	3	3	4	5	5	2	5	3	2	3	30	180	280	2800	210	490	1.46	21.11
4	1	1	154	70	2012	11	1	3	1	30	3	40	7	50	400	0	1	1	1	1	0	1	1	2	3	2	3	3	2	3	3	3	3	4	5	30	120	350	2800	150	500	1.54	29.52
4	1	1	150	47	2013	5	1	2	1	20	3	30	7	20	300	0	0	1	1	1	0	0	1	2	1	1	3	2	1	1	3	2	2	1	2	20	90	140	2100	110	250	1.5	20.89
4	1	1	150	57	2013	6	1	1	1	20	2.5	75	7	40	240	0	0	0	0	0	0	0	0	3	2	3	3	2	3	2	2	1	2	2	2	20	187.5	280	1680	207.5	487.5	1.5	25.19
4	1	1	148	36	2012	10	1	2	1	10	5	20	7	120	50	0	1	1	0	1	1	1	1	4	3	5	4	4	5	1	1	3	1	1	5	10	100	840	350	110	950	1.48	16.44
4	2	1	165	45	2012	10	1	2	5	60	5	60	5	60	260	1	1	1	1	1	1	1	1	4	2	3	4	2	3	4	4	3	2	2	2	300	300	300	1820	600	900	1.65	16.53
4	2	1	153	40	2012	10	1	2	5	60	5	60	5	60	260	1	0	1	1	0	0	0	1	1	1	1	4	2	5	2	1	1	4	1	5	300	300	300	1820	600	900	1.53	17.09
4	2	1	153	37	2012	11	1	2	5	60	5	60	5	60	260	1	0	1	1	1	0	0	1	5	5	5	3	1	1	2	1	2	2	1	3	300	300	300	1820	600	900	1.53	15.81
4	2	1	153	38	2012	8	1	2	5	60	5	60	5	50	260	1	1	1	1	1	1	0	1	3	2	4	5	5	3	2	2	3	3	5	5	300	300	250	1820	600	850	1.53	16.23
4	2	1	150	34	2011	10	1	2	5	60	5	60	5	50	260	1	0	1	1	1	1	1	1	3	2	4	2	3	5	3	2	2	2	2	4	300	300	250	1820	600	850	1.5	15.11
4	2	1	156	40	2012	2	1	2	5	60	5	60	5	30	260	1	0	1	1	1	1	0	1	3	1	2	3	1	2	2	1	2	2	3	3	300	300	150	1820	600	750	1.56	16.44
4	2	1	151	37	2012	2	1	2	5	60	5	60	5	30	260	1	0	1	0	1	1	0	1	2	2	1	4	3	3	2	2	3	3	3	3	300	300	150	1820	600	750	1.51	16.23
4	2	1	148	36	2012	6	1	2	5	60	5	60	5	30	260	0	0	1	1	0	1	0	1	3	3	1	3	3	1	3	2	3	3	3	3	300	300	150	1820	600	750	1.48	16.44
4	2	1	161	48	2012	1	1	3	2	150	4	60	5	20	375	0	1	1	0	0	1	0	1	4	3	3	2	3	4	4	2	4	2	2	3	300	240	100	2625	540	640	1.61	18.52
4	2	1	171	64	2012	3	1	2	5	60	5	60	5	60	260	1	1	1	1	1	1	0	1	3	2	1	2	2	2	1	1	2	1	4	3	300	300	300	1820	600	900	1.71	21.89
4	2	1	168	52	2012	3	1	2	5	60	5	60	5	60	260	1	1	1	0	1	1	1	0	4	4	4	4	3	4	4	4	3	4	4	3	300	300	300	1820	600	900	1.68	18.42
4	2	1	155	50	2012	4	1	2	5	60	5	60	5	60	260	1	0	1	0	1	1	1	1	2	3	2	2	3	4	2	2	2	2	4	3	300	300	300	1820	600	900	1.55	20.81
4	2	1	162	52	2012	5	1	2	5	60	5	60	5	60	260	1	1	1	1	0	1	0	1	5	5	5	5	5	5	5	5	5	5	5	5	300	300	300	1820	600	900	1.62	19.81
4	2	1	160	53	2011	10	1	2	5	60	5	60	5	60	260	1	0	1	1	1	1	1	0	3	2	3	3	2	3	2	2	3	3	3	3	300	300	300	1820	600	900	1.6	20.7
4	2	1	157	48	2012	6	1	2	5	60	5	60	5	50	260	1	0	1	1	1	0	1	1	2	2	2	2	2	2	3	3	2	2	2	3	300	300	250	1820	600	850	1.57	19.47
4	2	1	157	56	2012	7	1	2	5	60	5	60	5	40	260	1	0	1	1	1	1	1	1	5	5	5	5	5	5	5	5	4	5	4	5	300	300	200	1820	600	800	1.57	22.72
4	2	1	154	50	2012	12	1	3	5	60	2	60	7	30	240	1	1	1	1	1	1	0	1	1	3	4	5	5	5	1	1	4	1	5	5	300	120	210	1680	420	630	1.54	21.08
4	2	1	167	69	2012	2	1	2	5	60	5	60	5	60	260	1	0	1	1	1	1	1	1	5	3	3	3	3	2	5	2	3	3	2	2	300	300	300	1820	600	900	1.67	24.74
4	2	1	160	70	2012	4	1	2	5	60	5	60	5	60	260	1	0	1	0	1	1	1	1	5	5	5	4	4	5	4	4	5	5	5	4	300	300	300	1820	600	900	1.6	27.34
4	2	1	154	60	2012	8	1	2	5	60	5	60	5	60	260	1	0	0	0	0	0	0	1	3	3	3	4	4	4	3	3	3	3	3	3	300	300	300	1820	600	900	1.54	25.3
4	2	1	153	41	2012	7	1	3	2	120	4	30	7	12.5	500	1	1	1	1	1	0	0	1	4	3	2	3	3	2	2	3	2	1	1	2	240	120	87.5	3500	360	447.5	1.53	17.51
4	2	1	145	31	2012	11	1	2	2	120	3	40	7	30	420	0	0	1	1	0	1	0	1	3	2	2	2	2	2	3	2	3	2	2	4	240	120	210	2940	360	570	1.45	14.74
4	2	1	167	43	2011	11	1	2	2	120	3	50	2	120	30	0	0	1	1	1	1	0	1	2	3	3	3	3	4	2	3	3	2	2	3	240	150	240	210	390	630	1.67	15.42
4	2	1	145	32	2012	10	1	2	2	120	3	27.5	2	60	30	1	0	1	0	1	1	1	1	3	3	4	5	5	4	3	2	3	2	1	2	240	82.5	120	210	322.5	442.5	1.45	15.22
4	2	1	164	41	2008	6.5	1	2	2	120	3	30	4.5	45	250	0	1	1	1	0	0	0	1	5	4	1	5	4	5	3	2	2	5	5	5	240	90	202.5	1750	330	532.5	1.64	15.24
4	2	1	161	55	2012	3	1	2	4	60	5	55	2	90	30	1	0	0	1	1	1	0	1	5	3	1	5	5	5	4	5	3	2	1	2	240	275	180	210	515	695	1.61	21.22
4	2	1	155	55	2011	9	1	3	4	60	5	25	7	30	40	1	1	1	1	1	1	1	1	5	5	5	3	3	5	2	4	5	4	4	3	240	125	210	280	365	575	1.55	22.89
4	2	1	153	50	2011	9	1	2	3	30	2	40	7	60	320	0	0	1	1	0	0	0	1	2	2	1	2	2	1	2	1	2	2	2	2	90	80	420	2240	170	590	1.53	21.36
4	2	1	157	46	2011	11	1	2	3	30	3	40	5	60	30	0	0	1	1	0	1	1	1	4	3	2	4	3	1	3	2	3	2	3	4	90	120	300	210	210	510	1.57	18.66
4	2	1	156	62	2012	4	1	2	3	30	2	40	7	40	82.5	0	0	0	0	1	0	0	1	2	1	2	2	3	2	2	1	4	1	1	3	90	80	280	577.5	170	450	1.56	25.48
4	2	1	158	60	2012	4	1	2	3	30	3	25	5	120	40	0	1	1	0	1	1	1	1	3	2	2	4	4	4	2	2	2	4	4	2	90	75	600	280	165	765	1.58	24.03
4	2	1	154	45	2012	7	1	3	2.5	5	7	30	5	10	240	0	0	1	1	1	1	1	1	5	3	3	3	3	3	5	4	3	2	3	2	12.5	210	50	1680	222.5	272.5	1.54	18.97
4	1	2	150	36	2013	1	1	3	4	56.7	3.5	60	3.5	50	155	1	0	1	0	0	0	0	0	1	1	1	1	1	1	1	1	2	2	1	2	226.67	210	175	1085	436.67	611.67	1.5	16
4	1	2	154	32.5	2013	4	1	3	7	30	3	40	5	20	40	0	0	1	0	0	1	0	1	4	3	3	4	3	3	2	3	3	2	3	3	210	120	100	280	330	430	1.54	13.7
4	1	2	153	42	2012	7	1	1	4.5	45	5	30	7	30	580	1	0	1	0	1	0	0	1	2	2	4	3	3	2	2	3	2	2	3	2	202.5	150	210	4060	352.5	562.5	1.53	17.94
4	1	2	152	45	2012	10	1	2	4	50	4	50	2	40	60	1	0	1	0	0	0	0	1	2	2	2	2	1	2	2	2	2	2	2	2	200	200	80	420	400	480	1.52	19.48
4	1	2	156	44	2012	3	1	1	2	95	2.5	72.5	4.5	52.5	407.5	0	0	1	0	1	0	0	1	3	2	3	3	2	3	2	2	2	2	2	2	190	181.25	236.25	2852.5	371.25	607.5	1.56	18.08
4	1	2	150	32.5	2013	2	1	2	4	45	5	30	2	12	23	1	1	1	0	0	1	1	1	2	3	3	3	2	4	2	3	1	2	2	2	180	150	24	161	330	354	1.5	14.44
4	1	2	141	35	2013	1	1	3	3	60	2	30	5	20	20	0	1	0	0	1	1	1	1	3	2	3	3	4	4	2	2	2	2	3	3	180	60	100	140	240	340	1.41	17.6
4	1	2	147	37	2012	11	1	1	3	60	2	30	3	20	40	0	0	0	0	0	0	1	0	3	1	3	3	1	3	2	2	3	1	2	3	180	60	60	280	240	300	1.47	17.12
4	1	2	145	41.5	2012	5	1	3	3	60	2	30	2	20	60	0	0	1	1	1	1	0	1	3	2	4	4	4	5	5	2	2	5	4	4	180	60	40	420	240	280	1.45	19.74
4	1	2	138	65	2013	9	1	2	3	60	5	45	7	40	60	1	1	1	1	1	1	0	1	5	5	5	5	5	5	3	3	5	3	5	5	180	225	280	420	405	685	1.38	34.13
4	1	2	150	50	2012	11	1	3	2	30	1	40	7	30	60	0	0	1	1	1	1	0	1	2	3	5	5	5	5	1	1	2	4	5	5	60	40	210	420	100	310	1.5	22.22
4	1	2	142	48.5	2013	2	1	1	2	30	3	14	2	11	16	0	0	0	0	0	0	0	0	2	1	1	2	1	1	2	2	1	2	2	1	60	42	22	112	102	124	1.42	24.05
4	1	2	150	36	2012	12	1	1	1.5	35	2	30	2	20	260	1	0	0	0	0	0	0	1	3	2	4	3	2	4	4	4	3	3	2	2	52.5	60	40	1820	112.5	152.5	1.5	16
4	1	2	146	35	2013	4	1	3	1.5	35	5	60	1	30	20	0	0	1	0	0	0	0	0	2	2	1	2	1	2	2	2	2	1	1	3	52.5	300	30	140	352.5	382.5	1.46	16.42
4	1	2	132	27	2012	12	1	2	1	50	5	35	5.5	22.5	177.5	0	0	1	0	0	0	0	1	2	1	3	3	1	2	2	1	2	3	2	3	50	175	123.75	1242.5	225	348.75	1.32	15.5
4	1	2	162	46	2013	4	1	2	1	50	4	65	7	25	80	0	1	1	0	1	1	1	1	4	3	4	4	3	4	3	4	5	4	3	5	50	260	175	560	310	485	1.62	17.53
4	1	2	157	55	2013	6	1	2	1	50	4	70	6	30	130	0	0	0	0	0	1	0	1	5	4	5	3	4	2	5	5	4	2	1	4	50	280	180	910	330	510	1.57	22.31
4	1	2	154	47	2012	12	1	1	2.5	20	6	15	7	20	46.7	0	0	1	1	0	0	0	1	4	4	3	5	4	4	2	2	2	4	3	4	50	90	140	326.67	140	280	1.54	19.82
4	1	2	150	35	2013	4	1	2	1	45	4	60	6	20	60	0	0	1	1	0	1	0	1	2	1	1	2	2	2	2	3	2	2	2	3	45	240	120	420	285	405	1.5	15.56
4	1	2	143	33	2013	5	1	3	2	20	7	20	7	20	260	0	1	1	1	1	0	1	1	2	2	2	2	1	2	2	3	3	3	3	2	40	140	140	1820	180	320	1.43	16.14
4	1	2	166	55	2012	12	1	2	1	40	2	50	7	30	400	0	0	0	0	0	0	0	1	3	3	2	2	2	3	2	2	4	3	2	3	40	100	210	2800	140	350	1.66	19.96
4	1	2	153	40	2012	4	1	1	1.7	22.5	4	15	2	10	40	0	0	0	0	0	0	0	1	2	2	1	2	2	1	2	2	2	1	3	2	37.5	60	20	280	97.5	117.5	1.53	17.09
4	1	2	143	30	2013	3	1	3	1	30	3	40	7	20	400	0	1	1	1	1	0	1	1	3	3	3	3	3	3	2	2	2	2	2	2	30	120	140	2800	150	290	1.43	14.67
4	1	2	131	25	2013	2	1	3	1	30	2	40	7	20	400	0	0	0	0	1	1	0	1	2	2	1	1	1	2	1	1	1	1	1	1	30	80	140	2800	110	250	1.31	14.57
4	1	2	147	48	2012	8	1	2	3	10	6	33.3	5	10	20	0	0	1	1	1	0	1	1	3	3	4	3	4	5	5	5	3	3	5	5	30	200	50	140	230	280	1.47	22.21
4	1	2	150	40	2013	8	1	3	1	20	3	30	7	20	400	0	0	1	1	1	1	0	1	5	5	5	5	5	5	4	4	4	4	4	5	20	90	140	2800	110	250	1.5	17.78
4	1	2	150	50	2013	8	2	3	1	20	3	30	7	30	400	0	0	1	0	0	0	0	1	1	3	2	3	2	3	1	1	2	2	1	3	20	90	210	2800	110	320	1.5	22.22
4	1	2	160	50	2013	8	1	2	2	10	2	40	1	70	70	0	0	0	0	0	0	0	0	1	1	1	4	2	2	1	1	1	1	3	1	20	80	70	490	100	170	1.6	19.53
4	2	2	159	38	2012	1	1	2	5	60	5	60	5	60	260	1	1	1	1	1	1	0	1	3	2	3	3	3	3	3	3	2	2	2	4	300	300	300	1820	600	900	1.59	15.03
4	2	2	140	35	2012	1	1	2	5	60	5	60	5	60	260	1	0	0	0	1	0	0	0	4	2	2	1	1	2	2	1	2	1	1	2	300	300	300	1820	600	900	1.4	17.86
4	2	2	146	35	2012	4	1	2	5	60	5	60	5	60	260	0	0	0	1	1	1	0	1	4	4	4	4	4	4	4	4	2	4	4	2	300	300	300	1820	600	900	1.46	16.42
4	2	2	143	28	2012	4	1	2	5	60	5	60	5	60	260	1	0	0	1	1	1	0	1	4	4	4	4	4	4	4	4	2	4	4	2	300	300	300	1820	600	900	1.43	13.69
4	2	2	154	40	2011	11	1	2	5	60	5	60	5	60	260	1	0	1	1	1	1	0	1	3	2	3	3	2	3	2	1	2	2	1	3	300	300	300	1820	600	900	1.54	16.87
4	2	2	142	32	2011	12	1	2	5	60	5	60	5	60	260	1	0	1	1	1	1	0	1	4	4	4	4	4	5	4	4	4	3	3	3	300	300	300	1820	600	900	1.42	15.87
4	2	2	152	35	2012	8	1	2	5	60	5	60	5	50	260	1	1	1	0	1	0	0	1	1	2	1	1	3	1	4	1	2	3	3	3	300	300	250	1820	600	850	1.52	15.15
4	2	2	149	39	2012	9	1	2	5	60	5	60	5	50	260	1	1	1	1	1	1	1	1	3	3	2	1	2	1	3	3	3	2	2	2	300	300	250	1820	600	850	1.49	17.57
4	2	2	165	47	2011	12	1	2	5	60	5	60	5	40	260	1	1	1	0	0	1	0	1	3	2	5	2	3	2	3	2	5	2	1	4	300	300	200	1820	600	800	1.65	17.26
4	2	2	153	41	2012	1	1	3	5	60	4	30	7	40	100	1	1	1	1	0	1	1	1	3	3	4	3	3	3	2	2	2	2	3	4	300	120	280	700	420	700	1.53	17.51
4	2	2	160	52	2012	1	1	2	5	60	5	60	5	60	260	1	1	1	0	1	1	1	1	3	2	4	3	4	4	2	2	2	5	3	3	300	300	300	1820	600	900	1.6	20.31
4	2	2	165	52	2012	1	1	2	5	60	5	60	5	60	260	1	0	1	1	1	0	1	1	5	5	5	5	5	5	5	5	5	2	3	3	300	300	300	1820	600	900	1.65	19.1
4	2	2	152	42	2012	7	1	2	5	60	5	60	5	60	260	1	1	1	1	1	1	1	1	2	4	4	5	5	5	3	5	4	4	4	5	300	300	300	1820	600	900	1.52	18.18
4	2	2	151	44	2012	8	1	2	5	60	5	60	5	60	260	1	0	1	0	1	1	1	1	2	2	1	3	3	2	2	2	3	2	2	2	300	300	300	1820	600	900	1.51	19.3
4	2	2	142	43	2012	8	1	2	5	60	5	60	5	60	260	1	1	1	1	1	1	0	1	5	5	5	5	5	5	5	3	5	5	3	5	300	300	300	1820	600	900	1.42	21.33
4	2	2	163	51	2011	11	1	2	5	60	5	60	5	60	260	1	0	1	1	1	1	0	1	2	2	2	3	2	2	4	3	2	2	2	2	300	300	300	1820	600	900	1.63	19.2
4	2	2	150	43	2011	11	1	2	5	60	5	60	5	60	260	1	0	1	1	0	0	1	1	4	4	4	2	3	2	4	3	4	3	2	4	300	300	300	1820	600	900	1.5	19.11
4	2	2	163	50	2011	8	1	2	5	60	5	60	5	50	260	1	0	0	0	0	0	0	1	3	1	2	2	3	2	3	1	2	3	2	3	300	300	250	1820	600	850	1.63	18.82
4	2	2	141	40	2012	9	1	2	5	60	5	60	5	50	260	1	1	1	1	0	1	1	1	2	3	1	2	3	3	2	1	2	3	3	3	300	300	250	1820	600	850	1.41	20.12
4	2	2	143	42	2011	11	1	2	5	60	5	60	5	40	260	1	0	1	1	1	1	0	1	3	3	4	2	2	2	2	3	3	2	2	3	300	300	200	1820	600	800	1.43	20.54
4	2	2	152	56	2012	9	1	2	5	60	5	60	5	60	260	1	1	0	0	1	1	1	1	4	3	3	4	3	3	3	5	2	3	2	2	300	300	300	1820	600	900	1.52	24.24
4	2	2	154	40	2012	6	1	3	7	40	3	30	2	15	60	0	0	1	1	0	0	0	1	5	5	3	5	2	3	1	2	5	5	3	2	280	90	30	420	370	400	1.54	16.87
4	2	2	160	45	2011	3	1	1	6	40	4	30	7	20	500	0	0	0	0	1	0	0	1	1	1	1	1	1	1	1	1	1	1	1	1	240	120	140	3500	360	500	1.6	17.58
4	2	2	155	43	2011	12	1	2	6	40	6	10	1	50	500	0	0	1	1	1	1	0	1	3	2	3	3	3	2	2	1	2	3	2	3	240	60	50	3500	300	350	1.55	17.9
4	2	2	162	49	2012	1	1	3	4	60	3	30	3	15	32	1	0	1	1	1	1	1	1	3	4	4	5	4	5	5	5	3	3	2	3	240	90	45	224	330	375	1.62	18.67
4	2	2	156	50	2011	10	2	2	5	45	5	40	3	40	20	0	0	1	0	1	1	0	1	2	1	2	3	1	2	3	3	2	2	1	2	225	200	120	140	425	545	1.56	20.55
4	2	2	140	26	2012	10	1	3	2	110	5	60	7	20	180	0	1	1	1	1	1	0	1	3	3	2	3	3	2	4	3	3	2	1	2	220	300	140	1260	520	660	1.4	13.27
4	2	2	157	46	2012	4	1	3	2	110	4	60	2	30	200	0	0	0	1	0	0	0	1	5	2	1	1	1	2	1	1	2	1	1	1	220	240	60	1400	460	520	1.57	18.66
4	2	2	157	50	2012	2	1	2	4	55	3	20	6	35	120	0	1	1	1	1	1	1	1	2	5	5	2	5	5	5	5	5	5	5	5	220	60	210	840	280	490	1.57	20.28
4	2	2	156	48	2011	12	1	3	7	30	3	20	7	50	40	0	1	1	0	0	1	0	1	3	3	3	3	3	4	3	3	4	3	3	3	210	60	350	280	270	620	1.56	19.72
4	2	2	156	45	2012	3	1	3	7	30	3	20	7	30	40	0	0	1	1	0	0	0	1	2	2	2	3	4	3	3	2	2	3	3	3	210	60	210	280	270	480	1.56	18.49
4	2	2	160	30	2012	8	1	2	3	30	6.5	20	3	10	320	0	0	0	0	0	1	0	1	4	3	4	4	3	2	1	2	3	2	1	2	90	130	30	2240	220	250	1.6	11.72
4	2	2	157	40	2012	7	1	2	3	30	3	30	3	60	300	1	0	1	1	1	1	1	1	4	4	5	4	4	5	3	2	1	4	3	1	90	90	180	2100	180	360	1.57	16.23
4	2	2	150	39	2012	4	1	2	3	30	3	25	7	30	360	0	1	1	1	1	1	1	1	4	5	5	5	5	5	4	4	4	5	5	5	90	75	210	2520	165	375	1.5	17.33
4	2	2	165	42	2012	1	1	2	3	30	3	30	7	10	210	1	0	1	1	1	0	0	1	2	2	2	2	2	2	2	2	2	2	2	2	90	90	70	1470	180	250	1.65	15.43
4	2	2	163	45	2011	11	1	3	3	30	4	30	7	20	40	1	1	1	0	1	1	0	1	3	2	4	3	2	5	1	1	4	3	2	3	90	120	140	280	210	350	1.63	16.94
4	2	2	158	40	2011	10	1	3	3	30	2	60	7	10	40	0	1	1	0	1	1	1	1	3	2	2	5	5	4	2	2	2	5	5	2	90	120	70	280	210	280	1.58	16.02
4	2	2	152	35	2012	3	1	3	3	30	3	20	7	20	40	0	0	1	1	1	0	0	0	3	2	2	3	2	3	2	2	2	2	4	3	90	60	140	280	150	290	1.52	15.15
4	2	2	158	53	2012	1	1	2	3	30	1	20	2	15	180	0	0	0	1	0	0	0	1	3	2	3	3	2	4	2	2	2	2	2	3	90	20	30	1260	110	140	1.58	21.23
4	2	2	158	52	2012	3	1	2	3	30	3	27	4	30	35	1	1	1	1	1	1	1	1	4	4	4	4	4	4	5	3	4	4	4	5	90	81	120	245	171	291	1.58	20.83
4	2	2	160	55	2012	10	1	2	3	30	4	20	7	24	20	0	0	1	0	1	0	0	1	5	3	3	4	5	5	3	3	4	4	4	4	90	80	168	140	170	338	1.6	21.48
5	3	1	147	35	2011	10	1	2	5	60	4	30	7	15	60	1	1	0	1	0	1	0	1	1	1	3	3	3	3	1	1	1	5	5	5	300	120	105	420	420	525	1.47	16.2
5	3	1	165	49	2010	11	1	2	2	120	4	20	3	20	150	0	0	0	0	1	0	0	1	1	4	5	3	4	3	2	3	2	2	1	2	240	80	60	1050	320	380	1.65	18
5	3	1	165	43	2010	10	1	3	2	120	2	30	7	10	15	0	0	1	1	1	0	0	1	4	2	4	3	1	2	2	2	3	3	3	3	240	60	70	105	300	370	1.65	15.79
5	3	1	162	70	2011	5	1	2	2	120	2	60	7	30	50	0	0	0	0	0	1	0	1	5	1	1	3	2	1	5	5	3	2	5	2	240	120	210	350	360	570	1.62	26.67
5	3	1	157	56	2011	5	1	2	3	60	1	20	2	60	720	0	1	0	0	1	1	1	1	2	3	1	3	4	3	4	3	2	2	2	2	180	20	120	5040	200	320	1.57	22.72
5	3	1	168.5	52.5	2011	7	1	2	3	60	7	30	6	20	60	1	0	1	0	0	1	0	0	3	2	3	2	2	2	3	4	2	2	3	4	180	210	120	420	390	510	1.69	18.49
5	3	1	168	43	2010	12	1	2	3	50	2	10	7	20	300	1	0	0	0	0	0	0	1	1	1	1	3	1	2	3	2	1	2	1	2	150	20	140	2100	170	310	1.68	15.24
5	3	1	150	30	2010	7	1	2	5	30	7	30	7	40	222	1	0	1	0	1	0	0	1	3	2	3	3	2	3	2	2	2	2	2	2	150	210	280	1554	360	640	1.5	13.33
5	3	1	170	55	2011	2	1	2	5	30	5	20	7	30	200	0	0	1	1	0	0	0	1	5	2	3	4	5	4	3	3	3	2	2	4	150	100	210	1400	250	460	1.7	19.03
5	3	1	162	85	2010	10	1	2	5	30	7	40	5	60	220	1	1	1	1	0	0	0	0	1	1	1	1	1	1	1	1	2	1	1	2	150	280	300	1540	430	730	1.62	32.39
5	3	1	168	60	2011	7	1	2	7	20	7	20	2	60	300	0	0	0	0	1	1	0	1	3	2	3	2	2	2	2	1	3	4	2	2	140	140	120	2100	280	400	1.68	21.26
5	3	1	153	37	2011	2	1	2	3	40	2	50	7	120	230	0	1	1	1	1	1	0	1	5	5	2	3	3	2	3	1	5	1	1	2	120	100	840	1610	220	1060	1.53	15.81
5	3	1	155	48	2011	1	1	2	4	30	7	30	7	30	150	1	0	1	1	1	1	0	1	2	2	1	3	3	3	3	3	2	2	2	3	120	210	210	1050	330	540	1.55	19.98
5	3	1	165	71	2011	2	1	2	2	60	1	60	2	40	20	0	0	0	0	0	0	0	1	3	1	2	2	2	2	2	1	1	1	2	3	120	60	80	140	180	260	1.65	26.08
5	3	1	152	45	2011	1	1	2	5	20	7	20	7	20	460	1	0	1	1	0	1	0	1	3	2	3	3	2	3	4	2	4	2	2	3	100	140	140	3220	240	380	1.52	19.48
5	3	1	173	55	2010	1	1	2	5	20	7	20	2	20	170	0	1	0	1	1	1	1	0	5	5	1	5	5	3	3	2	4	5	5	3	100	140	40	1190	240	280	1.73	18.38
5	3	1	160	50	2010	11	1	2	3	30	4	20	7	20	200	0	0	0	0	0	0	0	1	2	2	2	2	2	2	2	1	1	2	1	2	90	80	140	1400	170	310	1.6	19.53
5	3	1	170	50	2010	1	1	2	3	20	7	50	7	20	120	1	0	0	0	0	0	0	0	2	2	2	2	1	1	2	1	2	2	1	1	60	350	140	840	410	550	1.7	17.3
5	3	1	170	46	2010	11	1	2	2	30	7	20	7	20	120	1	1	1	0	1	0	0	0	4	5	2	3	1	3	2	3	3	2	1	2	60	140	140	840	200	340	1.7	15.92
5	3	1	170	47	2010	11	1	2	3	20	4	20	7	30	120	1	0	1	0	0	0	0	1	3	2	2	3	2	1	3	2	3	3	2	2	60	80	210	840	140	350	1.7	16.26
5	3	1	170	66	2011	12	1	2	3	20	2	20	7	20	300	0	0	1	1	0	1	0	1	1	1	1	4	2	5	2	1	1	3	2	3	60	40	140	2100	100	240	1.7	22.84
5	3	1	170	60	2010	11	1	2	3	20	7	20	7	30	33.3	0	0	1	1	0	0	0	1	1	3	2	1	2	4	2	4	2	3	1	1	60	140	210	233.33	200	410	1.7	20.76
5	3	1	160	48	2010	9	1	2	2	30	2	20	5	60	120	0	0	1	1	0	0	0	0	3	2	3	2	1	3	1	2	2	1	2	2	60	40	300	840	100	400	1.6	18.75
5	3	1	154	65	2011	7	1	3	5	10	5	40	5	20	142	0	0	0	1	0	0	0	1	2	2	1	4	3	3	1	1	1	4	4	2	50	200	100	994	250	350	1.54	27.41
5	3	1	160	43	2011	1	1	2	2	20	5	30	7	60	300	0	1	1	0	1	0	0	0	2	1	3	2	1	3	3	3	2	1	2	5	40	150	420	2100	190	610	1.6	16.8
5	3	1	140	30	2011	7	1	2	2	20	2	30	7	30	370	0	1	1	1	0	0	0	1	1	1	1	1	1	1	1	1	2	1	1	1	40	60	210	2590	100	310	1.4	15.31
5	3	1	160	41	2011	9	1	2	2	20	3	20	7	20	300	1	0	1	1	0	0	0	1	3	3	2	3	3	3	3	1	2	1	1	1	40	60	140	2100	100	240	1.6	16.02
5	3	1	165	45	2011	2	1	2	2	20	3	20	7	60	120	1	0	1	1	1	1	1	1	3	3	2	3	3	2	3	3	2	2	2	2	40	60	420	840	100	520	1.65	16.53
5	3	1	160	40	2010	10	1	2	2	20	5	20	7	30	300	0	0	1	0	0	0	0	0	2	2	1	1	1	1	2	1	2	1	1	1	40	100	210	2100	140	350	1.6	15.62
5	3	1	150	40	2010	1	1	2	2	20	7	20	7	40	200	1	0	1	1	1	1	1	1	1	1	1	2	1	2	2	1	1	2	2	2	40	140	280	1400	180	460	1.5	17.78
5	3	1	160	41	2010	11	1	2	2	20	5	20	7	20	120	1	0	0	0	0	0	0	0	3	2	1	2	2	2	1	1	2	2	2	2	40	100	140	840	140	280	1.6	16.02
5	3	1	150	50	2011	11	1	2	2	20	7	20	7	30	200	0	1	1	0	0	0	0	0	3	1	2	1	1	1	4	3	5	1	1	1	40	140	210	1400	180	390	1.5	22.22
5	3	1	157	50	2010	2	1	2	2	20	5	20	7	30	200	0	0	0	0	0	0	0	0	2	1	1	3	2	1	1	2	1	5	5	2	40	100	210	1400	140	350	1.57	20.28
5	3	1	150	35	2011	5	1	2	3	10	7	20	7	30	37.5	1	0	1	1	1	0	0	1	2	2	1	1	2	1	2	3	2	1	1	2	30	140	210	262.5	170	380	1.5	15.56
5	3	1	169	75	2011	1	1	2	1	30	2	40	1	30	30	0	0	0	0	0	1	0	1	5	3	4	4	4	4	2	2	3	3	2	4	30	80	30	210	110	140	1.69	26.26
5	3	1	163	70	2011	5	1	2	2	10	6	30	7	40	606.7	0	0	0	1	0	0	0	1	2	2	1	2	3	1	1	2	1	1	1	1	20	180	280	4246.67	200	480	1.63	26.35
5	4	1	167	43	2009	11	1	2	5	60	5	50	7	60	420	0	0	1	0	1	1	0	1	2	1	5	1	1	1	1	2	2	1	1	1	300	250	420	2940	550	970	1.67	15.42
5	4	1	177	50	2010	2	1	2	5	60	2	40	7	50	300	1	1	1	1	1	1	1	1	4	3	3	4	3	3	4	3	3	3	3	4	300	80	350	2100	380	730	1.77	15.96
5	4	1	175	54	2009	9	1	1	5	60	7	40	5	20	40	1	0	0	0	1	0	0	1	2	2	2	2	2	3	3	3	3	2	2	2	300	280	100	280	580	680	1.75	17.63
5	4	1	166	50	2010	8	1	2	5	60	5	60	5	60	460	1	0	0	0	0	0	1	1	4	3	3	3	2	4	1	2	3	3	2	3	300	300	300	3220	600	900	1.66	18.14
5	4	1	175	66	2010	8	1	2	6	50	7	30	7	30	300	0	0	0	0	0	0	0	1	3	3	2	3	4	2	2	2	2	2	2	2	300	210	210	2100	510	720	1.75	21.55
5	4	1	170	65	2010	4	1	2	5	60	5	10	7	10	400	1	1	1	1	1	1	1	1	2	2	3	4	3	3	2	3	2	3	4	3	300	50	70	2800	350	420	1.7	22.49
5	4	1	152	61	2010	5	1	1	5	60	5	60	6	30	430	1	0	1	1	0	1	0	1	3	3	3	3	3	3	2	2	2	2	4	2	300	300	180	3010	600	780	1.52	26.4
5	4	1	175	80	2009	10	1	2	5	60	5	30	2	15	300	1	0	1	0	0	1	1	0	4	3	3	3	4	3	2	2	3	2	2	2	300	150	30	2100	450	480	1.75	26.12
5	4	1	158	40	2010	8	1	2	7	40	7	30	5	40	400	0	0	1	1	0	0	0	1	5	5	5	1	2	1	5	5	3	1	1	1	280	210	200	2800	490	690	1.58	16.02
5	4	1	174	44	2010	2	1	2	7	40	7	40	7	30	280	0	1	1	1	0	0	0	0	2	2	2	2	2	1	1	1	1	1	1	2	280	280	210	1960	560	770	1.74	14.53
5	4	1	157	50	2010	5	1	1	5	50	4	40	3	40	440	1	0	1	0	0	0	0	1	3	2	1	3	3	3	4	4	3	2	3	3	250	160	120	3080	410	530	1.57	20.28
5	4	1	167	51	2010	7	1	2	5	50	3	15	5	20	140	0	0	1	1	1	1	0	1	3	3	2	2	2	2	4	2	2	3	2	2	250	45	100	980	295	395	1.67	18.29
5	4	1	169	50	2010	5	1	2	3	80	1	30	3	20	490	0	1	1	0	0	0	0	1	1	1	1	1	2	1	2	1	1	2	1	2	240	30	60	3430	270	330	1.69	17.51
5	4	1	172	50	2010	1	1	1	4	60	5	50	7	30	40	0	0	0	0	0	1	0	1	4	2	3	3	1	2	2	1	3	1	2	3	240	250	210	280	490	700	1.72	16.9
5	4	1	162	47	2010	2	1	1	4	60	2	40	1	30	40	0	0	0	1	1	0	0	1	2	1	2	3	2	3	2	2	1	3	3	3	240	80	30	280	320	350	1.62	17.91
5	4	1	179	65	2010	2	1	1	4	60	2	60	3	20	400	0	1	1	1	0	1	0	1	3	3	2	3	3	2	2	2	2	4	4	3	240	120	60	2800	360	420	1.79	20.29
5	4	1	174	50	2010	4	1	2	7	30	7	30	7	60	380	1	1	1	1	0	1	0	1	3	2	2	3	2	2	5	4	2	4	2	3	210	210	420	2660	420	840	1.74	16.51
5	4	1	175	70	2010	7	1	2	7	30	7	30	7	30	300	0	1	1	1	1	1	0	1	1	1	1	1	1	1	2	5	1	1	1	1	210	210	210	2100	420	630	1.75	22.86
5	4	1	175	53	2009	9	1	2	5	40	5	40	5	40	600	0	1	1	1	0	0	0	1	3	2	3	3	5	5	2	1	2	2	2	2	200	200	200	4200	400	600	1.75	17.31
5	4	1	166	42	2009	11	1	2	5	40	3	30	4	30	280	0	0	0	0	0	0	0	0	2	2	2	1	2	3	2	2	3	2	2	1	200	90	120	1960	290	410	1.66	15.24
5	4	1	170	68	2009	10	1	2	5	40	5	30	7	15	500	1	1	0	1	0	0	1	1	3	2	2	3	4	2	4	2	2	3	2	3	200	150	105	3500	350	455	1.7	23.53
5	6	1	177	56	2007	5	4	1	2	100	4	30	2	200	100	0	0	0	0	1	0	0	0	2	2	2	2	2	2	2	2	2	2	2	2	200	120	400	700	320	720	1.77	17.87
5	6	1	178	60	2005	5	1	1	3	60	2	30	5	30	20	0	0	0	0	1	1	0	1	3	3	3	3	3	3	3	2	3	3	3	3	180	60	150	140	240	390	1.78	18.94
5	6	1	172	68	2006	7	1	2	3	60	2	30	5	30	20	0	0	0	0	1	1	0	1	4	4	4	2	4	3	3	2	2	2	2	2	180	60	150	140	240	390	1.72	22.99
5	6	1	175	60	2007	9	1	1	5.7	30	2.5	20	4.3	20	60	0	0	0	0	1	0	1	0	1	1	1	1	1	1	1	1	1	1	1	1	170	50	86.67	420	220	306.67	1.75	19.59
5	6	1	174	60	2007	12	1	1	3	45	3	60	4	60	30	1	1	0	0	1	1	1	0	3	3	3	3	3	3	3	3	3	3	3	3	135	180	240	210	315	555	1.74	19.82
5	6	1	178	86	2006	8	1	1	3	45	3	15	1	10	60	0	1	1	0	1	1	1	1	3	3	3	2	3	4	3	3	3	3	4	3	135	45	10	420	180	190	1.78	27.14
5	6	1	183	60	2007	9	1	1	2	60	2	60	2	60	60	0	1	1	1	1	0	0	1	2	2	2	2	2	2	2	2	2	2	2	2	120	120	120	420	240	360	1.83	17.92
5	6	1	178	75	2007	9	4	3	2	60	2	60	7	30	120	0	0	1	0	0	0	0	1	2	1	2	1	2	1	2	2	1	1	1	1	120	120	210	840	240	450	1.78	23.67
5	6	1	177	88	2007	7	1	3	2	60	2	30	3	50	120	0	0	1	0	1	0	0	1	2	3	4	2	2	5	2	3	4	2	3	2	120	60	150	840	180	330	1.77	28.09
5	6	1	175	90	2006	4	4	1	2	60	2	20	3	30	120	0	0	0	0	1	1	0	1	4	3	4	4	3	4	3	4	3	4	3	3	120	40	90	840	160	250	1.75	29.39
5	6	1	167	50	2006	10	1	2	2	45	2	60	2	30	180	0	0	0	0	1	0	0	0	2	2	2	2	2	2	2	2	2	2	2	2	90	120	60	1260	210	270	1.67	17.93
5	6	1	176.5	65	2006	12	1	1	3	30	2	30	4	20	60	0	0	1	1	0	1	0	1	3	3	3	3	3	3	3	3	3	3	3	3	90	60	80	420	150	230	1.77	20.87
5	6	1	172	84	2007	8	4	1	3	30	3	30	4	60	30	0	0	0	1	0	1	0	1	3	2	3	3	3	3	3	3	2	3	2	3	90	90	240	210	180	420	1.72	28.39
5	6	1	185	65	2006	9	1	2	2	40	2	35	3.5	30	330	0	0	1	0	1	0	0	1	3	2	3	3	2	3	2	2	2	2	2	2	80	70	105	2310	150	255	1.85	18.99
5	6	1	178	70	2007	9	1	1	2	40	7	16.7	7	60	60	0	0	0	0	0	0	0	0	3	3	3	4	4	4	5	5	5	3	3	3	80	116.67	420	420	196.67	616.67	1.78	22.09
5	6	1	181	60	2007	8	1	2	2	30	5.5	45	4.5	60	120	0	1	0	0	1	0	0	0	1	1	1	1	1	1	1	1	1	1	1	1	60	247.5	270	840	307.5	577.5	1.81	18.31
5	6	1	175	102	2007	7	4	1	2	30	3	60	7	30	120	0	0	0	0	0	1	0	0	2	1	1	1	1	2	3	2	1	2	3	1	60	180	210	840	240	450	1.75	33.31
5	6	1	178	100	2007	9	4	1	2	30	5	20	6	35	120	0	1	0	0	0	0	0	0	2	1	1	1	2	4	1	1	1	2	1	2	60	100	210	840	160	370	1.78	31.56
5	6	1	171	75	2007	2	1	3	2	20	2	30	3	30	300	0	1	0	0	0	1	1	1	1	1	1	1	1	1	1	1	1	1	1	1	40	60	90	2100	100	190	1.71	25.65
5	6	1	176	80	2006	6	1	3	3	100	3	20	7	30	600	1	0	0	0	1	0	0	1	1	2	2	1	2	1	1	3	2	1	1	1	300	60	210	4200	360	570	1.76	25.83
5	6	1	170	60	2005	10	1	3	3	90	6	20	7	30	540	1	0	0	0	1	1	1	1	5	4	2	5	4	2	1	2	2	2	1	1	270	120	210	3780	390	600	1.7	20.76
5	6	1	180	70	2007	1	1	3	5	30	5	20	7	15	480	1	1	1	1	1	0	0	1	5	4	5	5	5	4	4	4	5	4	4	5	150	100	105	3360	250	355	1.8	21.6
5	6	1	177	85	2007	1	1	3	5	30	7	30	7	20	480	1	0	0	1	1	1	0	1	5	2	1	5	5	1	3	1	1	3	4	1	150	210	140	3360	360	500	1.77	27.13
5	6	1	172	60	2007	8	5	3	3	40	4	30	7	30	600	0	0	1	1	0	1	0	1	3	2	4	3	1	4	2	2	2	2	2	1	120	120	210	4200	240	450	1.72	20.28
5	6	1	165	55	2007	7	5	3	4	30	7	20	7	30	480	0	1	1	1	0	1	1	1	4	3	4	2	2	3	4	4	3	3	3	2	120	140	210	3360	260	470	1.65	20.2
5	6	1	188	85	2007	2	1	3	2	60	5	30	7	20	450	1	1	0	0	1	1	1	1	2	2	2	3	1	1	4	3	2	2	3	1	120	150	140	3150	270	410	1.88	24.05
5	6	1	170	70	2007	4	1	3	2	60	5	30	7	15	300	0	0	0	0	0	1	0	0	4	3	3	3	3	2	1	1	1	4	3	2	120	150	105	2100	270	375	1.7	24.22
5	6	1	184	85	2006	2	1	3	2	60	5	20	7	20	400	1	0	1	0	0	1	0	1	5	2	5	5	1	5	3	3	3	1	1	1	120	100	140	2800	220	360	1.84	25.11
5	6	1	175	80	2007	8	1	3	3	30	6	30	7	30	600	1	1	1	1	1	1	1	1	3	4	2	5	5	2	3	4	3	3	4	2	90	180	210	4200	270	480	1.75	26.12
5	6	1	173	70	2007	1	1	3	4	20	6	20	7	60	500	0	1	0	0	0	0	0	1	5	2	4	5	3	5	3	4	1	3	3	2	80	120	420	3500	200	620	1.73	23.39
5	6	1	170	70	2007	1	1	3	2	40	6	20	5	10	600	1	1	0	0	1	1	0	1	2	2	1	5	3	4	1	2	2	2	2	3	80	120	50	4200	200	250	1.7	24.22
5	6	1	182	57	2007	10	1	3	2	30	4	20	7	20	600	0	1	0	0	0	0	0	0	3	1	1	4	2	3	2	1	1	2	2	2	60	80	140	4200	140	280	1.82	17.21
5	7	1	178	71	2005	12	1	3	3	45	2	20	1	15	540	1	1	1	1	1	1	1	1	3	2	1	3	1	1	1	2	1	3	4	1	135	40	15	3780	175	190	1.78	22.41
5	7	1	175	63	2006	4	1	3	4	30	6	40	4	12	15	1	1	1	1	1	1	1	1	3	3	2	3	2	3	3	2	2	2	3	2	120	240	48	105	360	408	1.75	20.57
5	7	1	179	105	2006	7	1	2	1	120	2	20	7	30	480	1	1	1	1	1	1	1	1	1	1	1	3	2	2	1	1	1	2	2	1	120	40	210	3360	160	370	1.79	32.77
5	7	1	183	63	2006	4	1	3	2	50	5	60	7	30	480	1	1	1	1	1	1	1	1	3	1	1	3	3	3	1	1	1	1	1	1	100	300	210	3360	400	610	1.83	18.81
5	7	1	182	63	2005	10	1	3	3	30	8	20	7	30	655	1	1	1	1	1	1	1	1	1	1	1	1	1	1	2	2	2	1	1	1	90	160	210	4585	250	460	1.82	19.02
5	7	1	177	60	2006	2	1	3	3	30	3	60	7	30	480	1	1	1	1	1	1	1	1	3	3	3	3	3	3	2	2	2	2	2	2	90	180	210	3360	270	480	1.77	19.15
5	7	1	171	59	2006	4	1	2	3	30	4	20	7	15	500	1	1	1	1	1	1	1	1	3	2	2	3	2	2	2	2	2	3	3	3	90	80	105	3500	170	275	1.71	20.18
5	7	1	170	70	2006	2	1	2	2	40	5	30	7	20	500	1	1	1	1	1	1	1	1	1	1	1	4	3	3	1	1	1	4	2	2	80	150	140	3500	230	370	1.7	24.22
5	7	1	178	75	2005	12	1	3	7	10	7	10	2	20	720	1	1	1	1	1	1	1	1	3	3	3	3	3	3	3	3	2	3	3	2	70	70	40	5040	140	180	1.78	23.67
5	7	1	176	70	2006	4	1	3	1	60	7	30	7	10	570	1	1	1	1	1	1	1	1	3	3	3	3	3	3	3	3	2	3	3	2	60	210	70	3990	270	340	1.76	22.6
5	7	1	183	100	2006	8	1	3	3	20	5	60	7	20	600	1	1	1	1	1	1	1	1	3	2	2	3	2	2	2	2	2	2	2	2	60	300	140	4200	360	500	1.83	29.86
5	7	1	179	58	2006	1	1	3	3	15	2	30	8	40	180	1	1	1	1	1	1	1	1	3	3	2	2	2	2	2	2	2	1	1	2	45	60	320	1260	105	425	1.79	18.1
5	7	1	180	110	2005	9	1	1	1	40	3	40	7	60	120	1	1	1	1	1	1	1	1	3	2	2	2	2	2	2	2	2	2	2	2	40	120	420	840	160	580	1.8	33.95
5	7	1	168	60	2005	12	1	1	1	30	7	40	4	30	300	1	1	1	1	1	1	1	1	1	1	1	3	2	2	1	2	1	5	5	1	30	280	120	2100	310	430	1.68	21.26
5	7	1	178	98	2006	1	1	1	1	30	8	27.5	2	40	180	1	1	1	1	1	1	1	1	1	1	1	1	1	1	3	2	1	3	1	1	30	220	80	1260	250	330	1.78	30.93
5	7	1	179	75	2005	5	4	3	5	60	5	30	5	60	600	0	1	1	1	1	0	1	0	4	4	3	4	4	3	4	4	4	4	4	3	300	150	300	4200	450	750	1.79	23.41
5	7	1	180	70	2006	12	1	3	7	30	2	30	7	30	100	1	0	0	0	0	1	1	0	3	3	3	2	3	3	3	3	1	3	5	1	210	60	210	700	270	480	1.8	21.6
5	7	1	182	95	2006	7	4	2	7	30	3	30	3	60	300	1	1	0	1	0	1	1	0	2	3	3	2	2	2	2	2	2	3	3	3	210	90	180	2100	300	480	1.82	28.68
5	7	1	180	105	2006	5	1	2	7	30	2	30	6	40	40	0	1	1	1	0	0	0	0	3	3	3	3	3	3	3	3	3	3	3	3	210	60	240	280	270	510	1.8	32.41
5	7	1	175	70	2006	4	4	1	7	20	7	20	7	20	433.3	1	1	1	1	1	1	1	1	1	1	2	3	3	3	1	1	1	2	2	2	140	140	140	3033.33	280	420	1.75	22.86
5	7	1	179	72	2006	2	1	3	7	20	2	10	7	16	30	1	1	1	1	1	1	1	1	2	2	2	3	3	3	3	3	3	3	3	3	140	20	112	210	160	272	1.79	22.47
5	7	1	175	60	2006	1	1	1	4.5	25	2.5	20	2	20	120	0	0	0	0	0	0	0	0	2	2	2	2	2	2	2	2	2	2	2	2	112.5	50	40	840	162.5	202.5	1.75	19.59
5	7	1	170	65	2007	2	4	1	1	100	5	30	5	45	200	0	1	0	0	0	0	0	0	5	5	5	4	3	5	1	2	5	5	4	4	100	150	225	1400	250	475	1.7	22.49
5	7	1	173	55	2004	10	1	3	3	30	3	40	3	30	15	1	1	1	1	1	0	0	1	3	3	3	2	2	2	4	3	2	2	2	3	90	120	90	105	210	300	1.73	18.38
5	7	1	175	90	2006	6	4	3	3	30	5	30	5	30	200	1	1	0	0	1	1	0	1	3	2	3	3	3	2	2	2	2	2	2	2	90	150	150	1400	240	390	1.75	29.39
5	7	1	174	50	2006	7	1	1	2	40	2	50	3	60	400	0	1	1	0	1	1	0	1	2	2	2	3	3	3	3	3	3	4	4	4	80	100	180	2800	180	360	1.74	16.51
5	7	1	170	45	2006	3	1	1	2	40	3	20	7	60	300	0	0	0	1	1	1	1	1	5	5	5	3	3	3	3	2	3	3	3	3	80	60	420	2100	140	560	1.7	15.57
5	7	1	178	60	2006	10	1	1	2	40	2	30	2	30	100	0	1	1	1	1	1	1	1	3	3	3	3	3	3	2	3	3	3	3	3	80	60	60	700	140	200	1.78	18.94
5	7	1	181	94	2006	10	4	1	2	37.5	2	20	5	10	250	0	0	0	1	0	1	0	0	2	2	2	2	2	2	2	2	2	2	2	2	75	40	50	1750	115	165	1.81	28.69
5	7	1	180	80	2006	4	1	3	7	10	1	30	3	10	200	0	0	1	1	1	0	0	0	1	1	1	1	1	1	1	2	1	1	1	1	70	30	30	1400	100	130	1.8	24.69
5	7	1	178	50	2006	7	4	2	2	30	2	20	2	20	30	0	0	1	0	0	1	0	0	2	3	2	4	4	4	2	3	2	2	2	3	60	40	40	210	100	140	1.78	15.78
5	3	2	164	45	2010	11	1	2	1	180	2	30	7	20	60	0	1	1	1	1	1	1	1	3	2	3	5	5	3	1	1	1	5	5	5	180	60	140	420	240	380	1.64	16.73
5	3	2	162	46	2010	12	1	2	5	30	7	40	5	60	120	1	0	1	1	0	0	1	1	2	1	2	3	2	2	2	1	1	2	2	3	150	280	300	840	430	730	1.62	17.53
5	3	2	152	49	2011	5	1	2	5	30	3	10	2	5	30	0	1	1	1	1	1	1	1	5	3	5	5	4	4	5	2	3	5	5	5	150	30	10	210	180	190	1.52	21.21
5	3	2	150	40	2011	1	1	2	5	20	7	30	7	20	53.3	0	0	1	1	1	0	0	0	3	2	2	3	2	2	2	2	3	2	2	3	100	210	140	373.33	310	450	1.5	17.78
5	3	2	165	47	2010	12	1	2	4	20	5	30	7	20	100	1	1	1	1	1	0	1	0	3	3	2	2	2	2	4	2	2	2	2	3	80	150	140	700	230	370	1.65	17.26
5	3	2	158	43	2011	11	1	2	2	30	7	20	7	30	660	0	1	1	1	0	0	0	1	2	2	3	3	2	3	2	3	2	3	3	2	60	140	210	4620	200	410	1.58	17.22
5	3	2	159	39	2011	12	1	2	1	60	2	60	2	30	250	0	0	0	0	1	0	0	0	3	3	4	4	3	3	3	2	3	2	2	4	60	120	60	1750	180	240	1.59	15.43
5	3	2	158	43	2011	1	1	2	3	20	2	20	6	30	120	1	1	1	0	1	1	0	0	3	2	3	3	3	3	2	1	2	3	2	3	60	40	180	840	100	280	1.58	17.22
5	3	2	165	50	2011	3	1	2	3	20	3	30	2	30	300	1	0	1	1	1	1	0	1	2	2	1	1	2	1	3	1	1	2	2	2	60	90	60	2100	150	210	1.65	18.37
5	3	2	164	41	2011	4	1	2	2	20	7	20	7	20	660	0	1	1	0	0	0	0	1	1	2	1	1	2	1	2	2	1	2	2	3	40	140	140	4620	180	320	1.64	15.24
5	3	2	148	30	2011	6	1	2	2	20	7	20	2	20	200	0	1	1	1	0	0	0	0	1	1	2	1	1	1	2	1	1	3	1	2	40	140	40	1400	180	220	1.48	13.7
5	3	2	160	36	2011	2	1	2	2	20	7	20	7	20	120	1	1	1	1	1	1	0	1	4	3	4	4	3	3	5	4	4	3	2	5	40	140	140	840	180	320	1.6	14.06
5	3	2	158	45	2011	6	1	2	2	20	7	20	7	20	360	0	0	0	0	1	1	0	1	3	2	2	3	3	2	2	2	1	2	2	3	40	140	140	2520	180	320	1.58	18.03
5	3	2	150	41	2011	1	2	2	2	20	3	20	7	20	400	1	0	1	1	0	1	0	1	3	2	3	3	4	2	3	3	3	3	3	3	40	60	140	2800	100	240	1.5	18.22
5	3	2	162	59	2010	6	1	2	2	20	7	10	7	20	260	0	1	0	0	1	0	0	1	2	1	1	4	3	1	1	1	1	1	1	2	40	70	140	1820	110	250	1.62	22.48
5	3	2	158	71.5	2011	9	1	2	2	20	5	20	7	20	600	0	1	0	0	1	0	0	1	2	2	5	3	5	5	4	3	1	2	2	2	40	100	140	4200	140	280	1.58	28.64
5	3	2	166	68	2011	3	1	2	2	20	7	20	7	30	510	0	0	1	0	0	0	0	1	1	1	2	2	3	3	2	1	2	4	4	3	40	140	210	3570	180	390	1.66	24.68
5	3	2	155	40	2011	2	1	2	3	10	4	30	5	30	120	1	1	1	1	0	0	0	1	2	2	2	3	3	3	4	4	2	2	3	3	30	120	150	840	150	300	1.55	16.65
5	3	2	160	35	2011	3	1	2	2	10	6	20	7	20	730	0	0	0	1	0	0	0	1	1	1	3	1	1	1	1	1	1	1	1	1	20	120	140	5110	140	280	1.6	13.67
5	3	2	160	30	2011	1	1	2	2	10	6	20	2	30	80	1	0	0	1	0	1	1	0	1	1	2	1	1	1	2	1	2	3	2	3	20	120	60	560	140	200	1.6	11.72
5	3	2	161	50	2010	11	1	2	2	10	6	20	7	20	120	0	0	1	0	0	0	0	1	4	1	1	4	3	2	2	1	1	2	2	2	20	120	140	840	140	280	1.61	19.29
5	4	2	160	42	2009	11	1	2	5	60	5	60	5	30	280	1	1	0	1	0	0	0	1	2	1	2	3	3	2	2	2	2	3	2	3	300	300	150	1960	600	750	1.6	16.41
5	4	2	164	51	2009	3	1	2	5	60	4	20	4	20	300	0	1	0	0	1	0	1	1	1	1	1	2	2	1	2	3	2	3	3	3	300	80	80	2100	380	460	1.64	18.96
5	4	2	170	65	2010	4	1	2	5	60	2	40	2	27.5	340	0	1	1	1	0	1	0	1	2	1	1	3	2	1	1	1	1	3	1	2	300	80	55	2380	380	435	1.7	22.49
5	4	2	167	55	2010	5	1	2	5	60	7	40	6	30	240	0	0	1	1	1	0	0	1	4	2	1	2	2	2	1	1	1	1	1	1	300	280	180	1680	580	760	1.67	19.72
5	4	2	163	52	2010	6	1	2	5	60	7	20	6	20	200	1	1	1	1	1	1	1	1	2	1	1	5	5	5	3	1	1	2	2	3	300	140	120	1400	440	560	1.63	19.57
5	4	2	167	77.5	2010	5	1	1	5	60	3	30	6	20	560	1	0	0	0	0	0	0	0	2	1	1	2	1	1	2	2	2	2	2	2	300	90	120	3920	390	510	1.67	27.79
5	4	2	165	75	2009	11	1	2	4	70	5	50	7	20	600	0	0	0	1	1	1	1	1	5	4	5	4	4	4	4	3	3	4	3	1	280	250	140	4200	530	670	1.65	27.55
5	4	2	156	40	2010	8	1	1	5	50	7	50	7	30	460	1	0	1	1	0	0	0	0	1	1	1	2	1	1	1	1	1	1	1	1	250	350	210	3220	600	810	1.56	16.44
5	4	2	175	52	2010	3	1	1	5	50	3	30	5	30	440	0	0	0	1	0	1	0	1	3	3	3	3	3	3	3	2	3	2	2	3	250	90	150	3080	340	490	1.75	16.98
5	4	2	168	50	2009	10	1	1	5	50	3	30	7	20	450	1	1	0	0	1	0	0	1	3	5	2	4	4	4	3	2	3	3	3	3	250	90	140	3150	340	480	1.68	17.72
5	4	2	160	46	2010	6	1	2	5	50	2	20	3	20	430	0	1	0	0	0	0	0	1	2	2	2	2	1	3	2	1	3	2	2	3	250	40	60	3010	290	350	1.6	17.97
5	4	2	175	52	2010	1	1	1	5	50	3	30	7	30	420	0	0	1	1	1	0	0	1	3	3	3	3	3	3	3	3	3	2	3	3	250	90	210	2940	340	550	1.75	16.98
5	4	2	150	39	2010	1	5	1	5	50	3	30	3.5	7.5	65	0	0	0	1	0	0	0	0	3	2	3	3	3	3	2	2	2	2	3	3	250	90	26.25	455	340	366.25	1.5	17.33
5	4	2	160	48	2010	11	1	2	5	50	3	50	7	30	420	0	0	0	0	1	0	0	1	3	2	2	2	3	2	4	2	1	2	1	1	250	150	210	2940	400	610	1.6	18.75
5	4	2	157	45	2009	11	1	1	5	45	5	45	7	10	580	0	0	0	0	0	1	0	1	3	1	2	5	1	5	2	2	2	1	2	2	225	225	70	4060	450	520	1.57	18.26
5	4	2	160	40	2009	12	1	2	3	70	3	80	3	60	520	0	0	0	0	0	0	0	0	1	2	3	1	2	3	1	2	2	2	2	2	210	240	180	3640	450	630	1.6	15.62
5	4	2	160	49	2010	7	1	3	3	70	5	10	7	60	640	0	0	1	1	1	0	1	0	1	1	1	2	2	1	2	2	2	2	2	2	210	50	420	4480	260	680	1.6	19.14
5	4	2	157	46	2010	1	1	2	4.7	43.3	3	50	7	30	420	1	1	1	0	1	0	0	0	1	1	1	1	1	1	1	1	1	1	1	1	202.22	150	210	2940	352.22	562.22	1.57	18.66
5	4	2	167	50	2013	2	1	2	5	40	5	50	2	20	300	1	0	1	0	0	1	0	1	3	2	2	4	3	4	3	3	3	4	4	2	200	250	40	2100	450	490	1.67	17.93
5	4	2	171.5	47	2009	8	1	2	5	40	3	30	7	20	600	0	0	0	0	0	0	0	1	2	1	1	2	1	1	2	1	1	2	2	1	200	90	140	4200	290	430	1.72	15.98
5	4	2	160	53	2010	3	1	1	5	40	3	20	5	20	600	0	0	1	1	1	1	0	1	4	3	5	5	3	3	3	2	2	1	1	1	200	60	100	4200	260	360	1.6	20.7
5	4	2	165	65	2010	6	1	2	5	40	6	30	7	50	520	0	1	1	1	1	0	0	1	3	3	2	3	2	3	1	1	1	2	2	1	200	180	350	3640	380	730	1.65	23.88
5	6	2	168	50	2006	11	2	3	3	60	2	30	5	30	15	1	0	1	0	1	0	1	1	3	4	5	3	2	3	4	4	4	3	1	5	180	60	150	105	240	390	1.68	17.72
5	6	2	155	57	2007	4	1	1	2	60	2	60	7	20	30	0	0	1	0	1	1	0	1	4	3	4	4	3	4	3	2	2	2	3	3	120	120	140	210	240	380	1.55	23.73
5	6	2	165	55	2007	11	1	3	2	60	1	30	5	20	30	0	0	0	0	1	1	0	1	2	2	3	2	2	2	3	3	3	2	2	2	120	30	100	210	150	250	1.65	20.2
5	6	2	166	53	2007	11	1	3	2	60	1	30	5	20	30	0	0	1	1	1	0	0	1	1	1	1	1	1	2	1	1	1	1	1	1	120	30	100	210	150	250	1.66	19.23
5	6	2	163	41	2006	12	1	1	2	45	3	60	2	30	180	0	0	0	0	0	0	0	1	2	2	2	2	2	2	2	2	2	2	2	2	90	180	60	1260	270	330	1.63	15.43
5	6	2	163	44	2007	4	4	2	3	30	3	30	3	30	30	0	0	0	0	0	0	0	0	2	3	2	2	2	2	2	2	2	1	2	1	90	90	90	210	180	270	1.63	16.56
5	6	2	163	40	2007	1	1	1	2	40	2	10	2	40	180	0	0	0	0	0	0	0	0	2	2	2	2	2	2	2	2	2	2	2	2	80	20	80	1260	100	180	1.63	15.06
5	6	2	164	46	2007	12	1	1	2	40	2	40	5	10	40	0	1	0	0	0	0	0	1	2	1	2	2	1	1	1	2	1	1	1	1	80	80	50	280	160	210	1.64	17.1
5	6	2	153	80	2007	4	1	3	2	40	3	30	2	20	30	0	0	0	1	1	0	0	0	4	2	5	4	4	4	4	5	4	4	3	4	80	90	40	210	170	210	1.53	34.17
5	6	2	153	78	2006	12	1	1	2	40	2	30	3	50	40	0	0	0	0	1	0	0	0	5	4	4	4	4	4	4	4	2	4	4	4	80	60	150	280	140	290	1.53	33.32
5	6	2	163	50	2006	7	1	2	2	20	3	20	7	20	30	0	0	1	0	1	0	0	1	2	3	3	2	3	3	3	2	2	2	2	4	40	60	140	210	100	240	1.63	18.82
5	6	2	160	72	2006	11	1	1	2	20	3	20	2	20	20	0	0	0	1	1	0	0	0	2	3	3	2	3	2	3	2	2	2	2	4	40	60	40	140	100	140	1.6	28.12
5	6	2	162	65	2007	8	1	3	2	10	5	40	7	40	400	1	1	0	0	1	0	0	0	3	2	3	3	2	3	2	1	1	2	1	3	20	200	280	2800	220	500	1.62	24.77
5	6	2	167	49	2007	4	1	3	4	30	3	60	7	40	700	1	1	0	0	1	0	0	0	4	2	2	3	2	2	3	2	2	3	2	2	120	180	280	4900	300	580	1.67	17.57
5	6	2	158	40	2007	8	3	3	3	30	4	15	7	15	720	0	0	0	1	0	0	0	1	3	3	3	2	2	3	3	3	1	1	1	1	90	60	105	5040	150	255	1.58	16.02
5	6	2	173	56	2006	9	1	3	2	40	3	60	7	10	600	0	1	0	1	0	1	0	0	1	5	3	5	2	5	1	1	1	2	1	1	80	180	70	4200	260	330	1.73	18.71
5	7	2	160	60	2006	8	1	3	5	30	3	30	7	10	40	1	1	1	1	1	1	1	1	1	1	1	1	1	1	1	1	1	1	1	1	150	90	70	280	240	310	1.6	23.44
5	7	2	172	62	2005	12	1	3	3	20	3	15	6	15	185	1	1	1	1	1	1	1	1	3	3	3	3	3	3	3	2	2	3	3	3	60	45	90	1295	105	195	1.72	20.96
5	7	2	163	58	2006	6	1	3	2	25	5	10	6	6	655	1	1	1	1	1	1	1	1	1	1	1	3	1	3	1	1	1	3	5	1	50	50	36	4585	100	136	1.63	21.83
5	7	2	168	70	2006	3	1	3	1	20	3	60	7	8	790	1	1	1	1	1	1	1	1	3	3	5	5	3	5	3	4	5	5	5	5	20	180	56	5530	200	256	1.68	24.8
5	7	2	169	60	2006	4	1	1	6	40	3	30	7	40	300	0	1	0	0	1	1	0	1	4	2	5	4	2	5	2	3	2	2	2	3	240	90	280	2100	330	610	1.69	21.01
5	7	2	168	53	2005	3	1	1	7	30	5	10	7	10	30	1	1	1	1	1	1	1	1	4	4	4	4	4	4	4	4	4	4	4	4	210	50	70	210	260	330	1.68	18.78
5	7	2	160	50	2006	5	1	2	7	30	5	10	7	10	30	1	1	1	1	1	1	1	1	1	2	5	1	3	2	1	3	4	1	3	3	210	50	70	210	260	330	1.6	19.53
5	7	2	170	48	2005	11	1	1	4	40	5	40	5	20	200	1	0	1	1	1	1	1	1	4	2	3	3	1	3	2	1	1	3	1	1	160	200	100	1400	360	460	1.7	16.61
5	7	2	165	48	2006	5	1	1	4	30	4	30	3	40	200	0	0	0	0	0	0	1	1	2	1	2	1	2	3	2	1	1	1	3	3	120	120	120	1400	240	360	1.65	17.63
5	7	2	165	47	2006	5	1	1	4	30	4	30	3	40	200	0	0	1	0	0	0	1	1	2	1	2	1	1	3	2	1	1	1	3	1	120	120	120	1400	240	360	1.65	17.26
5	7	2	162	43	2005	10	1	2	2	60	3	60	2	50	30	0	0	0	0	0	0	0	0	2	2	3	2	1	2	2	2	2	2	2	2	120	180	100	210	300	400	1.62	16.38
5	7	2	165	65	2006	7	1	1	4	30	3	30	2	30	300	1	0	0	0	0	0	0	0	2	2	2	2	2	2	2	2	3	2	2	3	120	90	60	2100	210	270	1.65	23.88
5	7	2	160	48	2007	1	1	1	2	50	2	50	7	20	120	0	0	0	0	1	0	0	1	3	2	3	5	2	3	3	3	2	3	2	2	100	100	140	840	200	340	1.6	18.75
5	7	2	165	52	2006	5	1	1	3	30	5	20	4	40	600	0	0	0	0	1	0	0	0	2	1	5	5	2	5	2	4	3	2	3	3	90	100	160	4200	190	350	1.65	19.1
5	7	2	170	55	2006	2	1	2	3	30	3	40	6	40	200	0	0	0	0	1	0	0	1	1	1	3	2	2	2	2	2	1	2	2	1	90	120	240	1400	210	450	1.7	19.03
5	7	2	174	95	2006	2	1	1	2	40	1	30	7	20	120	0	0	0	0	0	0	0	0	3	1	1	1	1	1	2	1	1	3	1	1	80	30	140	840	110	250	1.74	31.38
5	7	2	168	50	2006	6	1	1	2	30	7	30	7	30	60	0	1	1	0	1	0	1	0	4	4	4	4	5	5	4	4	3	5	5	4	60	210	210	420	270	480	1.68	17.72
5	7	2	168	55	2005	10	1	2	2	30	6	30	7	10	400	0	0	1	0	0	0	0	1	2	2	2	3	2	2	1	1	1	2	2	3	60	180	70	2800	240	310	1.68	19.49
6	4	1	174	52	2010	1	1	2	4	45	2	20	7	20	400	0	0	1	0	1	1	0	1	3	3	4	3	4	5	4	3	4	4	2	2	180	40	140	2800	220	360	1.74	17.18
6	4	1	181	66	2009	11	1	3	3	60	3	30	4	50	226.7	1	0	1	0	0	0	0	0	2	5	5	4	5	5	5	5	1	4	4	3	180	90	200	1586.67	270	470	1.81	20.15
6	4	1	158	52	2010	5	1	2	3	60	4	20	5	30	200	1	0	0	0	1	1	1	1	2	3	2	3	5	3	1	1	2	3	2	3	180	80	150	1400	260	410	1.58	20.83
6	4	1	170	60	2010	10	1	2	3	60	4	40	3	15	120	1	0	1	0	0	1	0	1	2	3	3	3	3	4	2	4	4	4	2	4	180	160	45	840	340	385	1.7	20.76
6	4	1	172	75	2010	1	1	2	4	45	1	20	3	20	700	0	0	1	0	0	0	0	1	2	2	2	1	1	1	2	2	2	2	1	2	180	20	60	4900	200	260	1.72	25.35
6	4	1	173	74	2010	5	1	2	3	60	5	60	2	50	400	0	1	0	0	0	1	1	0	2	2	1	3	1	2	1	1	1	2	1	1	180	300	100	2800	480	580	1.73	24.73
6	4	1	169	90	2009	6	1	2	4	45	4	45	4	30	60	1	0	0	0	0	0	0	1	5	3	3	4	3	3	3	4	4	2	4	4	180	180	120	420	360	480	1.69	31.51
6	4	1	165	49	2010	5	1	2	3	50	4.33	36.7	3	10	460	0	0	0	1	1	0	0	1	3	3	3	3	3	3	2	3	2	2	2	3	150	158.89	30	3220	308.89	338.89	1.65	18
6	4	1	160	41	2009	11	1	1	3	50	2	50	3	50	450	0	0	0	0	0	0	0	0	4	4	3	4	4	3	1	1	1	2	2	1	150	100	150	3150	250	400	1.6	16.02
6	4	1	158	43	2009	12	1	2	5	30	5	30	3	20	400	0	0	0	0	1	0	1	1	2	2	2	2	3	4	3	3	4	2	4	3	150	150	60	2800	300	360	1.58	17.22
6	4	1	173	60	2009	1	1	1	5	30	5	30	5	120	430	0	1	0	0	0	0	0	1	1	2	3	3	2	1	1	1	2	1	2	2	150	150	600	3010	300	900	1.73	20.05
6	4	1	170	60	2009	5	1	2	3	50	3	50	3	50	450	0	0	0	0	0	0	0	0	4	4	3	4	4	3	1	1	1	2	2	1	150	150	150	3150	300	450	1.7	20.76
6	4	1	170	55	2010	8	1	1	3	50	3	50	4	20	440	0	0	0	0	0	0	0	0	1	1	1	1	1	1	1	1	1	1	1	1	150	150	80	3080	300	380	1.7	19.03
6	4	1	164	59	2010	5	1	1	3	50	5	20	7	60	560	0	0	0	0	1	0	0	1	2	2	2	1	2	3	5	1	1	3	2	4	150	100	420	3920	250	670	1.64	21.94
6	4	1	159	60	2010	7	1	1	5	30	2	10	7	13	350	0	0	0	1	1	0	1	1	3	2	2	3	1	1	2	1	1	1	2	2	150	20	91	2450	170	261	1.59	23.73
6	4	1	179	91	2009	7	1	1	3	50	1	30	5	10	640	0	0	0	0	0	0	0	0	1	1	1	1	1	1	2	1	1	1	1	1	150	30	50	4480	180	230	1.79	28.4
6	4	1	150	77	2010	7	1	1	3	50	3	50	6	20	350	0	0	0	0	0	0	0	1	4	4	3	4	4	3	1	1	1	2	2	1	150	150	120	2450	300	420	1.5	34.22
6	4	1	177	42	2010	1	1	2	2	60	3	10	2	60	240	0	0	0	0	0	0	0	1	1	1	1	1	1	1	1	1	1	1	1	1	120	30	120	1680	150	270	1.77	13.41
6	4	1	176	55	2010	3	1	1	4	30	3	40	5	20	30	0	1	0	1	0	1	1	0	2	2	4	2	3	3	2	3	4	3	3	3	120	120	100	210	240	340	1.76	17.76
6	4	1	168	45	2010	1	1	1	3	40	2	45	5	20	30	0	0	1	0	0	0	0	1	3	2	2	1	1	1	3	1	2	1	1	2	120	90	100	210	210	310	1.68	15.94
6	4	1	175	52	2009	12	1	2	3	40	2	20	2	20	30	0	0	0	0	0	0	0	1	2	2	3	3	2	3	2	1	1	2	2	2	120	40	40	210	160	200	1.75	16.98
6	4	1	150	35	2010	10	1	1	3	40	2	20	2	20	20	0	0	1	0	0	0	0	1	3	2	2	5	5	5	3	3	2	1	1	1	120	40	40	140	160	200	1.5	15.56
6	4	1	174	68	2009	9	1	2	2	60	2	60	5	50	480	0	0	0	1	1	0	0	1	3	2	4	4	3	5	3	2	2	3	2	2	120	120	250	3360	240	490	1.74	22.46
6	4	1	167	58	2009	5	1	2	4	30	2	20	5	20	450	0	0	0	0	0	0	0	0	1	1	1	1	1	1	1	1	1	1	1	1	120	40	100	3150	160	260	1.67	20.8
6	4	1	163	70	2009	7	1	2	3	40	4	10	4	30	300	0	0	0	0	0	0	0	1	3	1	1	1	1	3	2	2	1	2	2	1	120	40	120	2100	160	280	1.63	26.35
6	4	1	165	47	2009	12	1	1	7	15	5	20	7	40	540	0	1	1	1	1	0	1	1	4	2	5	5	2	5	2	2	2	5	2	3	105	100	280	3780	205	485	1.65	17.26
6	4	1	167	96	2010	8	1	2	3.5	30	3.5	10	6	20	390	1	0	0	0	0	1	0	1	2	2	3	4	3	2	1	1	5	1	2	4	105	35	120	2730	140	260	1.67	34.42
6	4	1	163	50	2010	7	1	1	3.3	30	3.5	50	7	7	450	0	0	1	1	0	0	0	1	3	3	3	3	3	3	3	2	2	3	3	3	100	175	49	3150	275	324	1.63	18.82
6	4	1	168	55	2009	12	1	2	5	20	5	20	5	20	250	0	0	0	1	0	0	0	0	3	1	2	3	3	2	3	2	1	1	2	1	100	100	100	1750	200	300	1.68	19.49
6	5	1	170	45	2009	8	1	1	7	40	5	30	7	45	180	1	1	1	1	1	0	1	1	2	2	1	2	1	1	2	3	1	2	2	2	280	150	315	1260	430	745	1.7	15.57
6	5	1	182	100	2009	11	1	1	4.3	50	3.5	45	7	90	120	0	0	0	0	0	0	0	0	2	2	2	2	2	2	2	2	2	2	2	2	216.67	157.5	630	840	374.17	1004.17	1.82	30.19
6	5	1	175	55	2008	5	1	1	4	45	6	45	6	40	300	0	0	0	1	0	1	0	1	1	1	1	1	1	1	1	1	1	1	1	1	180	270	240	2100	450	690	1.75	17.96
6	5	1	168	58	2009	1	4	2	3	60	1	14	2	60	600	0	1	0	0	1	0	0	0	4	2	2	3	2	2	3	1	1	2	1	1	180	14	120	4200	194	314	1.68	20.55
6	5	1	170	65	2009	4	1	2	3	60	2	30	6	40	120	0	0	0	0	0	0	0	0	3	4	4	3	3	3	3	2	3	3	3	3	180	60	240	840	240	480	1.7	22.49
6	5	1	177	88	2009	6	1	1	6	27.5	4.5	25	4.5	20	450	0	0	1	1	0	0	0	0	4	4	4	4	4	4	4	4	4	4	4	4	165	112.5	90	3150	277.5	367.5	1.77	28.09
6	5	1	178	72	2009	8	1	3	3	50	2	35	5	43.3	470	0	0	1	0	1	0	1	1	5	5	5	3	3	5	4	5	5	5	5	5	150	70	216.67	3290	220	436.67	1.78	22.72
6	5	1	172	60	2008	11	1	1	5	30	5	30	5	60	400	1	1	0	0	1	1	1	1	5	5	5	3	4	4	5	5	5	5	5	2	150	150	300	2800	300	600	1.72	20.28
6	5	1	168	60	2008	6	1	1	5	30	2	10	2	20	100	0	0	0	1	0	1	1	1	3	2	3	3	3	3	2	2	1	3	3	2	150	20	40	700	170	210	1.68	21.26
6	5	1	182	100	2009	5	1	1	5	30	5	30	5	30	600	1	1	1	1	1	1	1	1	5	5	5	5	5	5	5	5	5	5	5	5	150	150	150	4200	300	450	1.82	30.19
6	5	1	170	75	2008	9	4	1	5	30	2	20	4	20	50	0	1	0	0	1	1	1	0	3	3	3	3	3	3	2	2	2	2	2	2	150	40	80	350	190	270	1.7	25.95
6	5	1	170	90	2008	5	1	1	4	33.3	5	30	5.5	16	625	0	0	0	0	0	0	0	0	3	2	1	1	1	2	1	2	1	2	1	1	133.33	150	88	4375	283.33	371.33	1.7	31.14
6	5	1	180	50	2008	12	1	1	3	43.3	2	40	4.5	15.5	460	0	0	0	0	0	0	0	0	1	1	1	1	1	1	1	1	1	1	1	1	130	80	69.75	3220	210	279.75	1.8	15.43
6	5	1	162	65	2008	10	4	1	4	30	5.33	30	5.7	30	168	0	0	0	0	1	0	0	0	3	2	3	3	2	3	2	2	2	2	2	2	120	160	170	1176	280	450	1.62	24.77
6	5	1	175	74	2008	11	1	1	4	30	4	20	4	30	300	0	0	0	1	1	0	0	1	3	3	2	3	3	3	3	1	3	3	3	1	120	80	120	2100	200	320	1.75	24.16
6	5	1	163	49	2009	5	1	1	7	15	5	15	5	40	40	0	1	0	0	0	0	0	1	5	2	3	1	1	1	3	3	1	1	1	2	105	75	200	280	180	380	1.63	18.44
6	5	1	165	60	2009	4	1	1	2	45	3	55	7	20	600	0	1	1	0	0	0	1	1	2	2	1	2	2	1	2	2	2	2	2	2	90	165	140	4200	255	395	1.65	22.04
6	5	1	171	70	2008	12	1	2	3	30	7	30	7	20	120	0	1	0	0	1	1	0	1	2	2	3	3	3	4	3	3	1	3	3	3	90	210	140	840	300	440	1.71	23.94
6	5	1	158	67	2009	4	1	1	3	30	4	20	7	40	360	1	1	1	1	1	1	1	1	2	3	3	5	4	3	5	5	4	3	5	4	90	80	280	2520	170	450	1.58	26.84
6	5	1	163	38	2008	4	1	2	2	40	1	20	1	20	420	0	1	1	0	0	0	0	0	3	2	2	3	2	2	2	2	2	2	2	2	80	20	20	2940	100	120	1.63	14.3
6	5	1	167	80	2009	3	4	1	2	40	1	30	7	30	180	0	0	0	0	0	0	0	0	2	2	2	3	1	3	2	1	1	1	1	1	80	30	210	1260	110	320	1.67	28.69
6	5	1	175	55	2008	2	1	1	3	20	4	10	4.5	35	570	0	1	1	0	0	0	0	0	1	1	1	1	1	1	1	1	1	1	1	1	60	40	157.5	3990	100	257.5	1.75	17.96
6	5	1	176	50	2009	5	1	2	2	30	2	40	3	30	300	0	0	1	0	1	0	0	1	3	1	3	1	1	1	2	3	1	1	1	1	60	80	90	2100	140	230	1.76	16.14
6	5	1	167	47.5	2008	8	1	1	2	30	1	45	4.5	35	405	0	1	0	1	0	0	0	0	1	1	1	1	2	1	2	2	1	1	1	1	60	45	157.5	2835	105	262.5	1.67	17.03
6	5	1	176	55	2008	12	1	2	2	30	5	20	5	20	237.5	0	1	0	0	0	0	0	1	3	3	3	3	3	3	3	3	3	3	3	3	60	100	100	1662.5	160	260	1.76	17.76
6	5	1	170	87	2008	3	1	1	5	10	6	10	6	10	300	0	0	1	1	1	1	1	1	3	3	1	2	3	1	1	1	1	1	1	1	50	60	60	2100	110	170	1.7	30.1
6	5	1	168	45	2008	3	1	2	1	30	2	40	5	15	300	0	0	1	1	0	0	0	1	3	1	3	3	2	3	1	2	1	2	2	2	30	80	75	2100	110	185	1.68	15.94
6	5	1	173	82	2009	3	1	2	5	60	2	120	7	10	600	0	0	0	1	1	1	0	1	2	3	1	5	5	5	2	2	2	2	5	2	300	240	70	4200	540	610	1.73	27.4
6	5	1	180	51	2008	11	1	2	7	30	7	30	7	30	120	1	1	1	1	1	1	1	1	3	3	2	3	2	2	5	3	2	5	4	2	210	210	210	840	420	630	1.8	15.74
6	5	1	161	60	2009	5	2	2	6	30	1	12	7	60	600	0	1	0	0	0	0	0	1	3	1	2	5	1	2	1	1	1	1	1	1	180	12	420	4200	192	612	1.61	23.15
6	5	1	181	90	2009	7	1	2	3	60	2	30	6	120	30	1	1	1	1	0	1	1	1	5	5	4	2	2	2	5	5	2	2	2	3	180	60	720	210	240	960	1.81	27.47
6	5	1	176	85	2008	12	1	2	5	35	1	25	2	30	160	0	1	0	0	0	0	0	1	4	1	2	1	1	2	1	1	2	1	1	1	175	25	60	1120	200	260	1.76	27.44
6	5	1	172	46	2008	10	1	2	5	30	7	40	7	20	240	1	1	1	1	1	1	1	1	3	3	3	4	4	4	3	2	2	3	5	3	150	280	140	1680	430	570	1.72	15.55
6	5	1	175	69	2008	10	1	2	5	30	5	30	5	20	45	0	0	1	0	1	0	0	1	5	3	1	4	3	2	2	2	2	1	1	2	150	150	100	315	300	400	1.75	22.53
6	5	1	164	68	2009	9	1	2	5	30	5	20	6	20	120	0	1	0	1	0	0	1	0	2	5	4	2	4	4	3	1	1	5	5	1	150	100	120	840	250	370	1.64	25.28
6	5	1	178	76	2009	11	1	2	5	25	1	60	7	30	60	1	0	0	0	0	0	0	1	5	2	3	3	2	4	3	2	3	2	1	2	125	60	210	420	185	395	1.78	23.99
6	5	1	182	55	2009	8	1	2	5	20	2	40	7	20	180	0	0	1	1	1	1	0	1	2	2	1	2	2	2	3	3	2	3	4	2	100	80	140	1260	180	320	1.82	16.6
6	5	1	180	59	2009	7	1	2	5	20	2	30	7	40	780	0	0	0	0	0	1	0	1	3	2	2	4	1	3	2	2	2	5	3	2	100	60	280	5460	160	440	1.8	18.21
6	5	1	175	65	2009	3	1	2	3	30	5	30	2	15	420	0	1	0	0	0	1	1	1	2	2	1	2	3	1	3	1	2	1	2	2	90	150	30	2940	240	270	1.75	21.22
6	5	1	173	61	2008	10	1	3	2	30	5	50	7	60	300	0	0	1	0	0	0	0	1	2	2	2	3	5	1	2	4	2	2	2	1	60	250	420	2100	310	730	1.73	20.38
6	5	1	178	65	2009	8	1	2	3	20	4	10	3	20	30	0	0	0	0	1	1	0	1	5	3	5	5	3	5	4	5	3	3	2	3	60	40	60	210	100	160	1.78	20.52
6	5	1	172	65	2009	6	1	2	2	10	5	30	5	10	30	0	0	0	0	0	1	0	1	3	2	3	4	3	3	2	2	2	2	2	2	20	150	50	210	170	220	1.72	21.97
6	5	1	173	88	2009	3	1	2	1	20	5	40	7	60	600	0	0	0	0	1	0	1	0	5	2	4	5	3	5	1	3	2	3	3	3	20	200	420	4200	220	640	1.73	29.4
6	4	2	157	48	2010	11	1	1	4	50	3	50	5	7	450	0	0	0	0	1	1	1	0	3	2	4	3	2	1	2	1	2	2	4	2	200	150	35	3150	350	385	1.57	19.47
6	4	2	160	50	2010	2	1	1	5	40	2	25	3	30	400	0	0	0	0	0	0	0	0	3	2	5	3	3	3	2	4	2	2	2	2	200	50	90	2800	250	340	1.6	19.53
6	4	2	165	53	2010	1	1	1	5	40	6	20	4	15	40	0	1	0	1	1	0	1	1	3	3	3	5	5	5	3	3	3	2	2	4	200	120	60	280	320	380	1.65	19.47
6	4	2	160	50	2010	8	1	1	5	40	5	20	7	30	30	0	0	1	1	1	0	0	0	5	2	2	5	4	5	2	2	3	3	3	4	200	100	210	210	300	510	1.6	19.53
6	4	2	156	38	2009	8	1	2	6	30	2	20	5	20	200	0	1	1	0	0	0	0	1	2	1	1	4	1	3	1	1	1	3	1	3	180	40	100	1400	220	320	1.56	15.61
6	4	2	171	57	2009	8	1	1	4	40	3	50	2	10	510	0	1	1	0	1	1	1	1	4	4	4	4	4	4	3	3	2	3	3	3	160	150	20	3570	310	330	1.71	19.49
6	4	2	170	58	2010	3	1	2	5	30	2	20	7	10	580	0	0	0	0	0	1	0	0	2	1	2	2	2	3	1	3	2	1	2	2	150	40	70	4060	190	260	1.7	20.07
6	4	2	164	50	2009	5	1	1	3	50	4	50	6	10	450	1	0	0	0	0	0	0	0	2	3	5	2	3	4	3	2	2	2	2	5	150	200	60	3150	350	410	1.64	18.59
6	4	2	162	49	2010	4	1	1	3	50	4	30	4	10	450	0	0	1	1	1	0	0	1	2	2	2	3	3	3	2	2	2	2	2	2	150	120	40	3150	270	310	1.62	18.67
6	4	2	153	43	2010	3	1	2	5	30	3	40	7	30	360	1	1	1	1	0	1	0	0	3	4	4	3	3	3	1	4	1	4	4	1	150	120	210	2520	270	480	1.53	18.37
6	4	2	154	44	2009	10	1	1	5	30	1	30	3	30	400	0	0	0	0	0	0	0	0	2	1	1	2	1	1	2	2	1	4	2	2	150	30	90	2800	180	270	1.54	18.55
6	4	2	156	49	2009	10	1	2	5	30	4	50	7	40	250	1	1	0	0	1	0	0	1	4	3	5	3	3	4	3	3	2	4	3	3	150	200	280	1750	350	630	1.56	20.13
6	4	2	162	59	2010	10	1	2	5	30	4	30	5	20	270	0	0	1	1	1	0	0	0	4	2	3	4	2	4	3	2	2	3	2	3	150	120	100	1890	270	370	1.62	22.48
6	4	2	168	65	2009	5	1	1	3	50	1	50	7	5	30	0	0	0	0	0	0	0	1	2	1	1	2	2	1	2	2	2	1	2	1	150	50	35	210	200	235	1.68	23.03
6	4	2	160	95	2010	2	1	1	5	30	1	30	2	15	60	0	0	0	1	0	0	0	1	3	2	1	2	1	1	3	2	2	1	1	1	150	30	30	420	180	210	1.6	37.11
6	4	2	150	68	2010	4	1	2	3	43.3	1.33	31.7	7	30	180	0	1	1	1	1	1	0	1	5	5	1	5	5	5	1	1	1	1	1	5	130	42.22	210	1260	172.22	382.22	1.5	30.22
6	4	2	168	54	2010	2	1	1	5	25	3	10	2	20	450	0	0	0	0	0	0	0	0	4	1	5	3	1	5	4	3	4	3	1	4	125	30	40	3150	155	195	1.68	19.13
6	4	2	155	55	2010	6	1	2	5	25	3	20	5	10	420	0	0	0	0	1	0	0	1	3	1	4	3	2	3	2	1	3	1	1	2	125	60	50	2940	185	235	1.55	22.89
6	4	2	160	42	2010	1	1	2	4	30	7	40	7	50	400	0	0	1	0	0	1	0	1	3	4	3	3	4	4	4	4	2	4	3	2	120	280	350	2800	400	750	1.6	16.41
6	4	2	156	41	2010	6	1	2	4	30	2	20	6	20	300	0	1	1	0	0	0	0	0	3	4	2	4	3	4	4	4	2	2	2	4	120	40	120	2100	160	280	1.56	16.85
6	4	2	166	48	2010	2	1	2	3	40	3	40	7	20	210	0	1	0	1	0	0	0	0	1	1	5	1	1	1	1	1	1	1	1	1	120	120	140	1470	240	380	1.66	17.42
6	4	2	162	42	2010	1	1	2	2	60	3	60	5	30	30	0	1	1	0	0	1	0	1	2	2	2	1	1	1	2	2	2	1	1	1	120	180	150	210	300	450	1.62	16
6	4	2	166	66	2010	10	1	2	4	30	6	20	7	40	360	0	1	1	1	1	1	1	1	5	2	5	5	2	5	5	5	1	3	2	2	120	120	280	2520	240	520	1.66	23.95
6	4	2	159	60	2009	11	1	1	4	30	2	40	2	20	160	0	0	1	1	1	1	0	1	2	2	2	4	2	4	3	3	2	2	2	2	120	80	40	1120	200	240	1.59	23.73
6	4	2	167	80	2010	10	1	3	6	20	2	10	7	40	260	0	0	1	0	0	1	0	0	3	2	2	5	2	2	4	3	3	3	1	2	120	20	280	1820	140	420	1.67	28.69
6	4	2	160	56	2009	12	1	1	3	36.7	5	35	4.5	25	470	0	0	0	0	0	0	0	1	3	1	1	1	1	1	1	3	1	4	4	2	110	175	112.5	3290	285	397.5	1.6	21.87
6	4	2	171	52	2010	4	2	2	5	20	2	25	7	40	240	0	1	1	1	0	0	1	0	5	2	2	5	5	3	3	2	2	5	2	3	100	50	280	1680	150	430	1.71	17.78
6	4	2	165	45	2010	8	1	1	5	20	2	30	5	10	60	0	1	1	1	0	0	0	1	1	1	1	1	1	1	1	1	1	2	1	2	100	60	50	420	160	210	1.65	16.53
6	4	2	161	52	2010	3	1	2	5	20	4	20	7	30	180	0	0	0	0	1	0	0	1	1	1	1	3	2	4	2	1	1	3	2	3	100	80	210	1260	180	390	1.61	20.06
6	4	2	165	50	2010	11	1	1	5	20	5	20	5	30	40	0	1	0	1	0	1	0	1	3	2	3	3	2	2	2	2	3	2	2	2	100	100	150	280	200	350	1.65	18.37
6	4	2	159	47	2010	1	1	2	5	20	5	20	5	20	30	0	0	0	0	1	0	0	1	3	2	3	3	3	3	2	2	2	3	3	3	100	100	100	210	200	300	1.59	18.59
6	5	2	168	72	2008	8	1	2	4	75	5	35	7	60	30	0	1	1	1	0	1	0	1	2	2	2	2	2	2	2	2	1	3	2	2	300	175	420	210	475	895	1.68	25.51
6	5	2	158	45	2009	6	1	1	5	50	5	30	3	60	500	0	0	0	0	1	0	0	1	5	5	3	3	2	3	2	4	3	2	3	4	250	150	180	3500	400	580	1.58	18.03
6	5	2	165	65	2008	12	4	1	3	70	2.5	70	7	60	245	1	0	1	0	0	0	0	0	2	1	1	1	1	1	2	2	1	1	1	1	210	175	420	1715	385	805	1.65	23.88
6	5	2	165	47	2009	10	1	1	5	35	5	60	5	30	75	0	0	0	1	0	1	0	0	3	2	2	2	1	2	2	2	2	2	2	1	175	300	150	525	475	625	1.65	17.26
6	5	2	170	55	2009	4	1	1	3	50	4	30	3	40	550	0	0	0	0	0	0	0	0	3	2	3	3	2	3	2	2	2	2	2	2	150	120	120	3850	270	390	1.7	19.03
6	5	2	165	49	2008	6	1	1	4.5	30	1	15	4.5	20	350	0	0	0	0	0	0	0	1	2	1	2	2	1	1	2	1	1	1	1	1	135	15	90	2450	150	240	1.65	18
6	5	2	158	58	2008	12	1	2	2	60	2	20	5	60	120	0	0	1	1	0	0	1	1	5	5	5	5	5	5	5	5	2	3	5	3	120	40	300	840	160	460	1.58	23.23
6	5	2	160	74	2008	3	1	1	4	30	2	30	7	70	80	0	1	1	1	1	1	1	1	4	1	5	4	1	2	2	3	2	1	3	3	120	60	490	560	180	670	1.6	28.91
6	5	2	164	70	2009	8	4	1	2.5	45	2	30	4	15	60	0	0	1	1	0	1	0	1	2	2	3	3	2	2	3	3	2	3	2	3	112.5	60	60	420	172.5	232.5	1.64	26.03
6	5	2	177	80	2009	11	1	1	3	30	5	30	7	30	35	0	1	1	1	0	0	0	1	4	1	2	3	1	2	2	1	2	1	1	2	90	150	210	245	240	450	1.77	25.54
6	5	2	165	47	2008	12	1	1	2.7	33.3	1	20	5	37.5	260	0	0	1	1	1	0	0	0	3	2	4	3	2	3	2	2	3	2	2	1	88.89	20	187.5	1820	108.89	296.39	1.65	17.26
6	5	2	163	43	2009	3	1	1	2.7	30	1.33	26.7	7	25	120	0	0	1	1	0	1	0	1	4	4	4	5	3	2	3	3	3	3	3	3	80	35.56	175	840	115.56	290.56	1.63	16.18
6	5	2	177.5	69	2008	3	1	3	3	26.7	1	35	7	65	405	0	0	0	0	1	0	1	0	1	1	1	1	1	1	1	1	1	1	1	1	80	35	455	2835	115	570	1.78	21.9
6	5	2	160	49.5	2008	9	1	1	2	40	1	60	7	40	720	0	0	0	0	0	0	1	0	2	2	2	2	1	1	3	3	2	2	3	1	80	60	280	5040	140	420	1.6	19.34
6	5	2	160	60	2008	9	1	1	2	40	2	40	1	20	120	0	0	1	1	1	0	0	0	3	2	3	3	3	3	4	2	3	2	2	2	80	80	20	840	160	180	1.6	23.44
6	5	2	161	50	2008	12	1	1	2	30	3	60	4	75	255	1	1	1	1	1	1	1	1	3	3	3	3	3	3	5	5	5	3	3	3	60	180	300	1785	240	540	1.61	19.29
6	5	2	162	51	2008	11	1	2	1	60	1	55	2	30	206.7	0	0	0	0	1	0	0	1	3	2	3	3	2	3	2	2	2	2	2	2	60	55	60	1446.67	115	175	1.62	19.43
6	5	2	160	52	2008	5	1	2	2	25	5.33	46.7	4	30	600	0	0	0	0	0	0	0	0	1	1	4	2	2	2	2	2	2	1	2	2	50	248.89	120	4200	298.89	418.89	1.6	20.31
6	5	2	160	61.5	2008	11	1	1	1	50	1	50	1	25	403.3	0	0	1	1	1	0	0	0	3	2	3	3	2	3	2	2	2	2	2	2	50	50	25	2823.33	100	125	1.6	24.02
6	5	2	158	50.5	2008	2	4	2	1.5	30	3.5	40	4.5	20	30	0	0	0	0	1	0	0	1	3	3	3	3	3	3	3	3	3	3	3	3	45	140	90	210	185	275	1.58	20.23
6	5	2	160	45	2009	6	1	2	2	20	2	30	7	20	120	0	0	1	1	1	1	0	1	2	2	2	2	2	2	2	2	2	2	2	3	40	60	140	840	100	240	1.6	17.58
6	5	2	160	65	2008	10	4	2	2	20	2	30	7	130	460	0	0	1	1	1	0	0	1	3	2	3	5	3	4	2	2	1	4	3	1	40	60	910	3220	100	1010	1.6	25.39
6	5	2	170	45	2008	3	1	2	2.5	15	6.5	30	5	60	700	0	1	0	0	0	0	0	1	2	2	2	2	2	2	3	3	3	3	2	3	37.5	195	300	4900	232.5	532.5	1.7	15.57
6	5	2	168	60	2009	2	1	2	1	25	5	60	5	30	100	0	0	1	1	0	0	0	0	2	1	1	2	1	2	1	1	2	2	2	2	25	300	150	700	325	475	1.68	21.26
6	5	2	156	44	2008	11	1	2	1	15	4	50	7	30	310	0	0	0	0	0	0	0	0	1	1	1	1	1	1	1	1	1	1	3	1	15	200	210	2170	215	425	1.56	18.08
6	5	2	168	58	2009	9	1	2	5	40	2	60	7	14	180	1	0	0	0	1	1	0	1	3	1	1	3	2	2	2	2	2	3	2	3	200	120	98	1260	320	418	1.68	20.55
6	5	2	168	67	2009	3	1	2	5	35	5	20	7	10	360	0	0	1	1	1	0	1	1	5	3	2	5	5	5	3	2	3	2	3	2	175	100	70	2520	275	345	1.68	23.74
6	5	2	165	51	2009	10	1	2	5	30	3	25	5	20	315	1	1	1	1	1	1	0	1	4	3	2	5	3	4	3	3	2	3	4	4	150	75	100	2205	225	325	1.65	18.73
6	5	2	161	85	2009	10	1	2	5	30	7	15	2	20	60	0	0	1	0	1	0	0	1	1	3	1	5	3	3	1	2	1	4	5	3	150	105	40	420	255	295	1.61	32.79
6	5	2	166	61	2009	8	1	2	5	20	5	10	5	20	40	0	0	0	0	0	0	0	0	3	2	2	4	3	2	2	3	2	2	2	3	100	50	100	280	150	250	1.66	22.14
6	5	2	166	63	2008	9	1	2	5	20	5	10	5	10	30	0	0	0	0	0	0	0	0	2	3	1	5	5	5	3	3	3	2	5	2	100	50	50	210	150	200	1.66	22.86
6	5	2	167	88	2009	11	1	2	4	20	6	30	6	20	600	0	1	1	1	1	1	0	1	5	5	5	5	5	5	4	3	3	4	3	3	80	180	120	4200	260	380	1.67	31.55
7	4	1	155	50	2009	12	1	1	3	30	2	50	5	20	30	0	0	1	1	1	0	0	1	3	2	2	2	2	1	2	1	2	1	1	1	90	100	100	210	190	290	1.55	20.81
7	4	1	170	115	2010	3	1	1	3	30	5	60	7	30	300	1	0	0	0	0	1	0	1	2	2	3	3	2	3	4	2	2	3	4	2	90	300	210	2100	390	600	1.7	39.79
7	4	1	167	45	2009	12	1	2	2	40	2	10	5	20	180	0	0	1	1	1	1	0	1	3	2	2	2	3	3	2	3	2	1	3	1	80	20	100	1260	100	200	1.67	16.14
7	4	1	165	60	2010	6	1	1	2	40	3	20	3	15	525	0	0	0	0	1	1	0	1	1	2	3	4	2	4	2	2	1	1	2	2	80	60	45	3675	140	185	1.65	22.04
7	4	1	155	40	2009	9	1	1	5	15	7	20	7	30	540	0	0	1	0	1	1	1	1	3	3	3	4	4	3	3	2	3	2	2	2	75	140	210	3780	215	425	1.55	16.65
7	4	1	176	56	2009	10	1	2	7	10	2	50	7	20	240	1	0	0	1	1	0	0	1	2	3	4	3	2	4	2	3	4	2	3	4	70	100	140	1680	170	310	1.76	18.08
7	4	1	170	57	2010	1	1	1	3	20	7	20	7	20	500	0	0	0	1	1	0	0	1	3	2	2	3	2	2	3	3	2	1	1	1	60	140	140	3500	200	340	1.7	19.72
7	4	1	174	60	2010	6	1	1	2	30	3	30	7	10	430	0	0	1	1	0	1	0	1	1	1	1	1	1	1	1	1	1	1	1	1	60	90	70	3010	150	220	1.74	19.82
7	4	1	174	64	2009	5	1	3	3	20	1	50	7	20	360	0	0	0	1	0	0	0	1	1	1	1	2	2	2	2	1	2	1	1	1	60	50	140	2520	110	250	1.74	21.14
7	4	1	175	70	2009	10	1	2	3	20	4	40	3	20	200	0	0	0	0	0	1	1	0	3	3	2	3	3	2	2	2	4	3	3	3	60	160	60	1400	220	280	1.75	22.86
7	4	1	176	78	2010	3	1	2	1	60	3	30	7	30	240	0	1	1	1	1	1	0	1	5	5	5	5	5	5	3	3	4	4	4	3	60	90	210	1680	150	360	1.76	25.18
7	4	1	170	74	2009	11	1	2	3	20	3	30	7	20	120	0	0	1	0	1	1	0	1	3	3	2	3	3	3	3	3	2	3	2	3	60	90	140	840	150	290	1.7	25.61
7	4	1	173	100	2010	2	1	1	2	30	1	30	2	10	30	0	0	1	1	0	0	0	1	1	1	1	2	1	2	1	2	1	2	2	1	60	30	20	210	90	110	1.73	33.41
7	4	1	164	90	2009	10	1	1	2	30	1	30	1	10	30	0	0	1	0	0	0	0	1	1	1	1	1	1	1	1	1	1	1	2	1	60	30	10	210	90	100	1.64	33.46
7	4	1	169	52	2009	10	1	1	5	10	5	10	2	20	440	0	0	0	0	0	0	0	1	1	1	1	2	1	2	1	1	1	1	1	2	50	50	40	3080	100	140	1.69	18.21
7	4	1	160	48	2010	3	1	1	1	45	3	50	3	20	460	0	0	0	0	0	0	0	1	3	2	2	3	1	1	1	1	1	1	2	1	45	150	60	3220	195	255	1.6	18.75
7	4	1	166	49	2010	7	1	2	2	20	3	60	6	60	150	1	1	1	0	0	1	1	1	4	3	3	3	4	4	5	4	4	4	4	2	40	180	360	1050	220	580	1.66	17.78
7	4	1	175	62	2009	12	1	2	2	20	7	40	7	40	300	1	0	0	0	1	1	1	1	3	1	2	4	3	1	1	1	1	1	1	1	40	280	280	2100	320	600	1.75	20.24
7	4	1	156	44	2010	2	1	2	2	20	7	40	7	20	400	1	1	1	1	1	1	1	1	1	1	1	2	3	3	1	1	1	2	3	2	40	280	140	2800	320	460	1.56	18.08
7	4	1	174	61	2010	2	1	2	2	20	5	20	5	10	240	0	0	1	1	1	0	0	1	3	3	4	3	3	5	3	3	4	2	2	2	40	100	50	1680	140	190	1.74	20.15
7	4	1	168	58	2010	9	1	2	2	20	3	25	4	40	15	0	0	0	0	0	0	0	1	3	1	2	3	1	2	2	2	2	2	3	2	40	75	160	105	115	275	1.68	20.55
7	4	1	170	72	2009	10	1	2	2	20	3	60	6	80	250	1	0	0	1	0	1	1	1	3	3	3	4	2	4	3	2	4	5	2	3	40	180	480	1750	220	700	1.7	24.91
7	4	1	159	94	2009	10	1	1	2	20	4	60	1	20	40	0	0	1	1	1	1	0	1	2	1	2	3	3	2	1	2	2	3	5	4	40	240	20	280	280	300	1.59	37.18
7	4	1	167	50	2010	6	1	2	1	30	2	60	3	20	220	0	1	1	0	1	1	0	1	3	2	2	2	2	2	2	2	2	4	2	2	30	120	60	1540	150	210	1.67	17.93
7	4	1	172	70	2010	3	1	2	1	30	7	30	3	30	45	0	1	0	0	1	1	1	1	3	1	1	1	1	1	3	1	2	1	1	1	30	210	90	315	240	330	1.72	23.66
7	4	1	170	56	2010	8	1	1	1.3	16.7	5	40	2	20	460	0	0	0	0	1	1	0	1	3	1	3	3	2	5	1	1	1	3	3	3	22.22	200	40	3220	222.22	262.22	1.7	19.38
7	4	1	167	49	2010	9	1	1	1	20	3	30	7	20	460	0	0	0	0	0	1	0	1	1	1	1	1	1	1	1	1	1	1	1	1	20	90	140	3220	110	250	1.67	17.57
7	4	1	169	46	2009	3	1	2	1	10	5	20	7	20	120	0	1	0	0	1	0	0	1	3	3	2	3	3	3	2	3	3	3	4	3	10	100	140	840	110	250	1.69	16.11
7	6	1	185	55	2007	5	1	3	2	30	4	60	7	30	480	0	0	0	0	0	0	0	1	2	2	3	3	3	3	2	2	2	3	2	2	60	240	210	3360	300	510	1.85	16.07
7	6	1	175	58	2007	3	1	3	2	20	3	50	7	30	600	0	0	0	1	0	1	0	1	5	2	4	5	3	4	2	2	2	2	1	2	40	150	210	4200	190	400	1.75	18.94
7	6	1	170	61	2005	12	1	3	1	30	6	20	7	30	600	0	0	0	0	0	1	0	1	2	2	1	3	2	1	1	1	1	1	1	1	30	120	210	4200	150	360	1.7	21.11
7	6	1	166	50	2008	6	1	3	5	60	5	30	5	30	720	1	1	0	1	1	1	1	1	2	4	3	2	4	3	1	2	1	3	1	1	300	150	150	5040	450	600	1.66	18.14
7	6	1	170	52	2008	10	1	2	7	40	2	40	7	15	600	1	0	0	0	0	0	0	1	1	1	1	1	1	1	1	1	1	1	1	1	280	80	105	4200	360	465	1.7	17.99
7	6	1	181	100	2008	10	1	3	4	70	2	20	7	15	720	0	1	0	0	1	1	0	1	2	1	1	1	1	1	1	2	1	2	3	1	280	40	105	5040	320	425	1.81	30.52
7	6	1	175	87	2008	10	1	3	5	46.7	3	40	4	12	750	1	1	0	0	0	0	0	0	4	3	1	2	1	2	2	3	5	1	1	1	233.33	120	48	5250	353.33	401.33	1.75	28.41
7	6	1	172	53	2008	3	1	3	5.5	37.5	2	20	3	10	700	0	0	0	0	0	0	0	0	1	1	1	1	1	1	1	1	1	1	1	1	206.25	40	30	4900	246.25	276.25	1.72	17.92
7	6	1	183	68	2008	4	1	2	3.5	50	3	40	7	20	800	0	1	1	1	1	1	1	1	3	3	2	1	2	4	3	3	2	1	1	1	175	120	140	5600	295	435	1.83	20.31
7	6	1	172	70	2007	10	1	3	3.5	50	6	20	6	20	600	0	0	1	0	0	0	0	1	2	2	3	2	1	2	2	1	2	2	2	1	175	120	120	4200	295	415	1.72	23.66
7	6	1	177	70	2008	1	1	3	4	40	7	30	7	40	660	1	1	0	0	1	1	1	1	3	3	2	3	3	3	2	3	3	2	2	3	160	210	280	4620	370	650	1.77	22.34
7	6	1	170	55	2008	1	1	2	4	40	2	20	7	20	500	0	0	1	0	1	1	1	1	3	1	4	4	4	4	3	1	2	3	4	1	160	40	140	3500	200	340	1.7	19.03
7	6	1	171	68	2007	10	1	2	4.3	36.7	2	40	6	25	500	0	0	0	1	1	0	0	0	1	1	1	1	1	1	1	1	1	1	1	1	158.89	80	150	3500	238.89	388.89	1.71	23.26
7	6	1	170	52	2008	1	1	2	5	30	7	30	2	30	590	1	0	0	0	1	1	0	1	1	1	1	1	1	1	1	1	1	1	1	1	150	210	60	4130	360	420	1.7	17.99
7	6	1	181	60	2007	12	1	3	5	30	5	20	4	20	660	0	0	0	0	0	1	0	1	2	2	2	2	2	2	3	3	2	2	2	2	150	100	80	4620	250	330	1.81	18.31
7	6	1	179	58	2007	10	1	2	3	50	6	30	7	44.3	480	0	0	0	0	1	1	0	1	4	2	5	5	4	5	1	2	1	3	3	3	150	180	310.33	3360	330	640.33	1.79	18.1
7	6	1	166	43	2008	3	1	2	7	20	3	10	7	30	480	0	0	1	0	1	0	0	0	1	1	1	3	2	3	3	1	1	1	3	2	140	30	210	3360	170	380	1.66	15.6
7	6	1	182	68	2008	1	1	2	7	20	7	20	7	20	600	0	0	0	0	1	1	1	1	2	1	1	1	1	1	3	2	2	1	1	2	140	140	140	4200	280	420	1.82	20.53
7	6	1	175	70	2008	3	1	1	5	25	2	20	2	10	600	0	0	0	0	1	0	0	0	2	2	2	1	1	1	1	2	1	1	1	1	125	40	20	4200	165	185	1.75	22.86
7	6	1	183	77	2008	2	1	1	6	20	5	20	7	95	750	0	0	1	0	0	1	0	1	1	1	1	1	1	1	2	1	1	1	1	1	120	100	665	5250	220	885	1.83	22.99
7	6	1	177	60	2006	12	1	2	3	40	5	20	7	60	720	0	1	0	0	1	1	1	1	5	5	5	5	5	3	2	2	3	3	5	3	120	100	420	5040	220	640	1.77	19.15
7	6	1	172	73	2008	4	1	3	3	40	5	20	7	60	720	0	1	0	0	1	1	1	1	3	3	2	2	2	2	1	3	2	2	2	2	120	100	420	5040	220	640	1.72	24.68
7	6	1	183	88	2008	3	1	3	6	20	2	10	4.5	30	480	0	0	1	1	0	1	0	1	2	2	2	2	2	2	1	1	2	2	3	2	120	20	135	3360	140	275	1.83	26.28
7	6	1	184	110	2007	4	1	2	2	60	1	40	6	50	500	1	0	0	0	1	0	0	1	1	1	1	2	1	1	1	1	1	2	2	2	120	40	300	3500	160	460	1.84	32.49
7	6	1	178	77	2008	3	1	3	3.7	30	4	40	7	15	720	0	0	1	0	1	1	0	1	2	1	2	3	2	2	4	2	1	3	2	2	110	160	105	5040	270	375	1.78	24.3
7	6	1	179	89	2008	6	1	2	7	15	3	20	7	10	690	0	1	0	0	1	1	0	1	4	2	2	3	2	2	3	2	4	2	1	2	105	60	70	4830	165	235	1.79	27.78
7	6	1	181	61	2008	8	1	2	4.5	22.5	3.5	22.5	7	40	500	0	1	0	0	0	0	0	0	4	4	4	4	4	4	3	3	2	2	2	3	101.25	78.75	280	3500	180	460	1.81	18.62
7	6	1	176	56	2008	3	1	3	2	50	2	40	5.5	30	720	0	0	0	0	0	0	0	1	3	2	3	3	2	4	1	1	1	1	1	1	100	80	165	5040	180	345	1.76	18.08
7	6	1	185	65	2008	1	1	2	5	20	5	20	5	60	480	1	1	1	0	1	0	0	1	3	2	3	5	2	3	1	1	2	3	3	2	100	100	300	3360	200	500	1.85	18.99
7	6	1	172	70	2007	10	1	2	5	20	5	20	7	70	730	0	0	1	1	1	0	0	1	3	2	4	4	3	4	3	3	2	4	2	2	100	100	490	5110	200	690	1.72	23.66
7	6	1	178	100	2008	10	1	3	5	20	5	30	7	40	600	0	1	0	0	0	1	0	1	3	1	1	4	1	1	2	1	1	2	2	1	100	150	280	4200	250	530	1.78	31.56
7	6	1	173	80	2007	12	1	2	5	20	5	20	6	60	720	1	0	0	0	1	1	0	1	4	1	3	4	1	3	4	1	2	4	2	2	100	100	360	5040	200	560	1.73	26.73
7	6	1	190	55	2007	12	1	3	1	90	5	20	6	20	620	0	0	0	0	0	0	0	1	1	1	1	1	1	1	1	1	1	1	1	1	90	100	120	4340	190	310	1.9	15.24
7	6	1	171	51	2007	8	1	2	4.5	20	2	50	7	20	500	0	0	1	1	0	1	0	1	5	1	5	5	1	2	1	1	1	4	4	1	90	100	140	3500	190	330	1.71	17.44
7	6	1	177	59	2008	4	1	1	3	30	7	20	7	40	620	0	1	1	1	1	1	1	1	4	2	4	5	3	4	2	2	2	2	3	3	90	140	280	4340	230	510	1.77	18.83
7	6	1	171	79	2008	12	1	3	3	30	3	30	5	20	720	0	0	0	0	0	0	0	1	2	1	1	2	1	1	1	1	1	1	3	1	90	90	100	5040	180	280	1.71	27.02
7	7	1	178	50	2005	12	1	1	2	20	3	20	1	20	200	0	1	1	1	1	1	0	1	2	2	2	2	2	2	2	2	2	2	3	2	40	60	20	1400	100	120	1.78	15.78
7	7	1	173	65	2006	2	1	3	1	20	3	30	5	120	60	1	1	1	1	1	0	0	1	3	3	3	5	5	5	3	3	2	5	5	5	20	90	600	420	110	710	1.73	21.72
7	7	1	185	105	2006	3	4	1	1	20	2	60	7	15	380	0	0	0	0	1	1	0	0	3	1	1	2	1	2	1	1	1	2	2	1	20	120	105	2660	140	245	1.85	30.68
7	7	1	185	82	2005	11	1	3	4	80	7	30	7	15	720	1	1	1	1	1	1	1	1	1	1	1	1	1	2	1	1	1	2	1	2	320	210	105	5040	530	635	1.85	23.96
7	7	1	177	61	2006	1	1	3	7	45	7	20	2	30	90	1	1	1	1	1	1	1	1	5	2	1	5	3	5	1	1	2	2	3	2	315	140	60	630	455	515	1.77	19.47
7	7	1	177	74	2006	3	1	3	6	50	6	40	7	20	760	0	1	0	0	1	1	0	1	3	3	3	3	2	2	2	1	2	1	1	1	300	240	140	5320	540	680	1.77	23.62
7	7	1	171	56	2006	6	1	3	6	50	2	30	5	30	600	0	1	0	0	1	0	0	1	1	1	1	3	5	5	1	1	1	2	1	1	300	60	150	4200	360	510	1.71	19.15
7	7	1	173	65	2006	4	1	3	7	40	3	45	7	30	610	1	0	0	0	0	0	0	1	5	5	5	2	1	2	3	4	1	3	3	3	280	135	210	4270	415	625	1.73	21.72
7	7	1	174	69	2006	2	1	3	5	50	2	40	7	10	600	1	0	0	0	0	1	0	1	2	1	1	2	1	1	3	3	1	2	2	1	250	80	70	4200	330	400	1.74	22.79
7	7	1	182	69.5	2006	3	1	3	4	60	3.5	40	7	30	500	1	0	1	1	1	1	1	1	2	1	1	2	1	1	3	1	1	5	5	1	240	140	210	3500	380	590	1.82	20.98
7	7	1	185	80	2006	2	1	3	7	30	7	20	7	20	760	1	1	1	1	1	1	1	1	2	1	2	1	1	2	1	1	1	2	1	1	210	140	140	5320	350	490	1.85	23.37
7	7	1	173	66	2005	12	1	3	7	30	7	30	4.5	21	480	1	1	0	1	1	1	1	1	2	2	2	2	2	2	1	1	1	1	1	1	210	210	94.5	3360	420	514.5	1.73	22.05
7	7	1	170	70	2006	5	1	3	7	30	3	60	7	60	610	1	0	1	1	0	1	0	1	4	1	1	2	2	1	3	2	2	1	2	1	210	180	420	4270	390	810	1.7	24.22
7	7	1	175	63	2006	7	1	3	5	40	5	30	7	60	600	1	1	1	1	1	1	1	1	5	5	5	4	4	4	5	5	5	5	5	5	200	150	420	4200	350	770	1.75	20.57
7	7	1	179	72	2006	7	1	3	3	60	7	20	7	15	600	1	1	1	1	1	1	1	1	1	1	1	1	1	1	2	1	1	1	1	1	180	140	105	4200	320	425	1.79	22.47
7	7	1	165	49.5	2006	6	1	3	3	60	6	30	4	20	570	1	0	1	1	1	1	0	1	2	1	2	3	1	2	2	2	1	2	2	1	180	180	80	3990	360	440	1.65	18.18
7	7	1	177	65	2006	2	1	3	3	60	1	15	7	30	400	1	1	1	1	1	1	1	1	2	2	1	3	2	1	1	1	2	3	1	2	180	15	210	2800	195	405	1.77	20.75
7	7	1	165	71	2006	8	1	3	3.7	46.7	2	40	7	65	350	0	0	0	0	1	1	0	1	3	2	1	4	3	2	1	1	2	1	1	1	171.11	80	455	2450	251.11	706.11	1.65	26.08
7	7	1	172	83	2005	11	1	3	3	50	1	30	2	50	600	0	0	0	0	0	1	0	1	3	5	3	2	2	2	2	1	1	2	3	2	150	30	100	4200	180	280	1.72	28.06
7	7	1	180	73	2006	1	1	3	3.7	40	2	40	6.5	25	640	0	0	0	0	0	0	0	0	1	1	1	2	1	1	1	1	1	5	4	2	146.67	80	162.5	4480	226.67	389.17	1.8	22.53
7	7	1	177	78.5	2006	5	1	3	3.5	36	2	15	7	30	720	1	0	0	0	1	1	1	1	1	1	1	3	1	3	1	1	1	4	4	1	126	30	210	5040	156	366	1.77	25.06
7	7	1	176	72	2006	5	1	3	6	20	6	20	7	30	600	0	0	0	0	0	0	0	1	5	2	5	5	2	5	2	2	2	3	2	2	120	120	210	4200	240	450	1.76	23.24
7	7	1	175	59	2006	10	1	3	6	20	2	30	7	15	700	0	0	0	1	0	0	1	0	1	1	1	2	1	2	4	2	2	2	1	2	120	60	105	4900	180	285	1.75	19.27
7	7	1	181	80	2004	10	1	3	3	40	2	40	7	15	600	1	0	1	0	0	0	0	1	3	2	2	5	3	5	2	2	2	3	2	3	120	80	105	4200	200	305	1.81	24.42
7	7	1	175	75	2006	4	1	3	1	120	2	40	7	25	560	1	1	1	1	1	1	1	1	5	5	4	4	4	3	5	5	3	2	2	3	120	80	175	3920	200	375	1.75	24.49
7	7	1	184	78	2006	2	1	3	2	52.5	3.5	35	7	60	650	0	1	1	0	0	0	0	0	4	2	2	2	2	2	3	2	2	2	2	1	105	122.5	420	4550	227.5	647.5	1.84	23.04
7	7	1	175	75	2005	9	1	3	3	35	2	40	7	60	185	0	0	0	0	0	0	0	1	3	1	1	1	1	1	1	3	4	1	2	1	105	80	420	1295	185	605	1.75	24.49
7	7	1	172.5	52.5	2006	6	1	3	2	50	6	15	7	10	300	0	1	0	0	0	0	0	1	2	2	1	1	1	1	2	2	1	1	1	1	100	90	70	2100	190	260	1.73	17.64
7	7	1	174	61	2006	12	1	3	5	20	3	17.5	7	20	605	0	0	0	0	1	1	1	1	3	3	3	3	3	3	3	3	2	2	2	2	100	52.5	140	4235	152.5	292.5	1.74	20.15
7	7	1	169	55	2006	8	1	3	5	20	6	30	7	50	300	0	0	0	0	1	0	0	1	1	1	1	1	1	1	1	1	1	1	1	1	100	180	350	2100	280	630	1.69	19.26
7	7	1	180	60	2005	4	1	3	5	20	5	20	5	30	300	0	1	0	0	1	0	0	0	3	1	1	3	2	4	3	2	3	1	1	1	100	100	150	2100	200	350	1.8	18.52
7	7	1	180	60	2006	4	1	3	3	30	5	30	7	20	480	0	1	1	0	1	1	1	1	4	1	5	3	1	5	5	5	1	5	3	1	90	150	140	3360	240	380	1.8	18.52
7	7	1	180	75	2006	4	1	3	3	30	5	60	7	60	120	1	0	0	0	1	1	0	1	4	2	3	4	2	4	3	3	2	2	3	3	90	300	420	840	390	810	1.8	23.15
7	7	1	185	77	2006	2	1	3	3	30	7	20	5	15	100	0	1	1	1	1	1	1	1	2	2	3	2	2	3	2	2	2	2	2	2	90	140	75	700	230	305	1.85	22.5
7	7	1	182	55	2006	3	1	3	2	40	2	40	1	10	720	0	1	1	1	0	0	0	1	3	2	3	3	2	3	2	2	1	1	2	1	80	80	10	5040	160	170	1.82	16.6
7	7	1	185	58	2006	6	1	3	2	40	2	10	7	60	600	1	1	1	1	1	1	1	1	2	2	2	2	2	2	2	2	2	2	2	2	80	20	420	4200	100	520	1.85	16.95
7	7	1	172	67	2006	8	1	3	4	20	5	30	6	40	720	0	1	0	0	1	1	0	1	3	2	3	4	3	4	3	3	3	1	1	1	80	150	240	5040	230	470	1.72	22.65
7	7	1	172	54	2005	6	1	3	2	40	6	10	6	20	780	0	1	0	0	0	0	0	1	1	1	1	2	1	1	1	1	1	2	1	1	80	60	120	5460	140	260	1.72	18.25
7	7	1	172.5	54.5	2007	7	1	1	2	40	7	40	7	30	360	1	0	1	0	0	1	0	1	3	1	2	3	2	3	2	2	2	2	2	3	80	280	210	2520	360	570	1.73	18.32
7	7	1	182	105	2006	5	1	3	2	40	3	30	7	60	600	1	1	1	1	1	1	1	1	2	2	2	3	3	3	2	2	2	2	2	3	80	90	420	4200	170	590	1.82	31.7
7	7	1	183	90	2006	6	1	3	2	40	7	20	2	10	480	0	1	1	1	1	1	1	1	3	2	3	3	3	3	2	2	2	3	3	3	80	140	20	3360	220	240	1.83	26.87
7	4	2	163	52	2009	11	1	1	5	20	2	30	4	7	40	0	1	1	0	0	1	0	1	3	2	4	4	3	3	3	3	4	3	3	5	100	60	28	280	160	188	1.63	19.57
7	4	2	160	52	2008	12	1	1	5	20	2	30	3	7	40	0	0	0	0	1	0	0	1	1	1	1	2	1	1	2	2	2	1	2	1	100	60	21	280	160	181	1.6	20.31
7	4	2	164	39	2010	8	2	2	3	30	2	30	7	50	450	1	1	1	1	1	1	1	1	5	4	4	4	4	4	4	4	4	4	4	4	90	60	350	3150	150	500	1.64	14.5
7	4	2	161	57	2010	3	1	1	3	30	5	20	3	20	440	0	0	1	0	1	0	1	1	2	3	3	2	2	2	2	3	2	2	3	3	90	100	60	3080	190	250	1.61	21.99
7	4	2	166	57	2010	4	1	2	3	30	3	40	7	40	360	1	0	1	1	1	1	1	1	5	5	5	5	5	5	5	5	3	5	5	5	90	120	280	2520	210	490	1.66	20.69
7	4	2	154	48	2009	10	1	3	3	30	2	40	2	5	45	0	0	1	0	0	0	0	0	3	2	3	3	2	3	2	2	2	3	3	2	90	80	10	315	170	180	1.54	20.24
7	4	2	164	46	2010	2	1	2	4	20	4	60	7	15	60	1	0	0	0	0	0	0	0	3	3	3	3	3	3	3	3	3	3	3	3	80	240	105	420	320	425	1.64	17.1
7	4	2	150	34	2010	7	1	1	4	20	2	30	3	10	40	0	0	1	1	0	0	0	0	2	1	1	2	1	1	1	2	1	1	1	1	80	60	30	280	140	170	1.5	15.11
7	4	2	166	54	2010	2	1	1	2	40	4	30	5	20	600	0	0	0	0	1	0	0	1	4	3	3	3	3	3	3	2	2	2	2	2	80	120	100	4200	200	300	1.66	19.6
7	4	2	168	67	2008	10	1	1	2	40	4	30	5	20	600	0	0	1	1	1	0	0	1	5	1	1	5	5	4	3	1	2	5	5	5	80	120	100	4200	200	300	1.68	23.74
7	4	2	160	50	2010	7	1	1	2	40	5	40	7	40	300	0	0	1	1	1	0	0	1	3	2	4	2	2	3	5	5	3	5	4	4	80	200	280	2100	280	560	1.6	19.53
7	4	2	155	50	2010	8	1	1	2	40	5	20	7	15	300	0	1	0	0	1	0	0	1	1	3	1	3	3	1	2	1	1	3	2	3	80	100	105	2100	180	285	1.55	20.81
7	4	2	152	45	2009	6	1	2	3	23.3	2	40	7	20	420	0	0	1	0	0	0	0	1	3	2	2	3	2	3	3	4	5	2	2	2	70	80	140	2940	150	290	1.52	19.48
7	4	2	159	44	2010	1	1	2	2	30	3	60	5	15	80	0	1	1	1	1	1	0	1	5	4	4	5	5	4	4	5	2	5	4	3	60	180	75	560	240	315	1.59	17.4
7	4	2	171	43	2009	9	1	2	2	30	3	30	5	20	120	0	0	0	1	0	0	0	1	2	3	3	2	3	2	2	2	2	2	3	2	60	90	100	840	150	250	1.71	14.71
7	4	2	167	45	2009	9	1	1	2	30	4	20	5	10	40	0	0	0	1	1	0	0	1	1	1	3	3	3	5	2	2	5	3	3	4	60	80	50	280	140	190	1.67	16.14
7	4	2	155	47	2010	6	1	1	3	20	3	30	5	30	430	0	0	0	0	1	0	0	1	2	3	2	2	5	2	3	4	2	3	4	3	60	90	150	3010	150	300	1.55	19.56
7	4	2	161	56	2010	3	1	1	2	30	2	20	4	20	560	0	0	0	0	1	0	1	1	4	3	3	4	5	4	3	3	2	2	3	4	60	40	80	3920	100	180	1.61	21.6
7	4	2	162	55	2010	1	1	2	2	30	3	60	7	20	80	1	0	1	1	1	1	0	1	5	4	4	4	4	4	4	4	5	4	4	5	60	180	140	560	240	380	1.62	20.96
7	4	2	156	52	2010	8	1	2	2	30	3	30	5	10	120	0	0	1	1	1	0	1	1	5	5	5	5	5	5	4	4	4	5	5	5	60	90	50	840	150	200	1.56	21.37
7	4	2	170	71	2010	5	1	2	2	30	3	60	7	30	120	0	0	1	0	1	1	0	1	5	5	5	5	5	5	5	5	5	5	4	3	60	180	210	840	240	450	1.7	24.57
7	4	2	154	42	2010	6	1	2	5	10	5	20	7	20	600	0	1	1	0	1	1	0	1	1	1	1	1	1	1	3	3	2	1	1	2	50	100	140	4200	150	290	1.54	17.71
7	4	2	159	67	2010	3	1	2	5	10	3	30	7	60	200	0	0	1	0	1	1	1	1	1	1	1	3	2	3	1	1	3	1	1	2	50	90	420	1400	140	560	1.59	26.5
7	4	2	166	50	2009	8	1	1	2	20	5	40	7	40	350	0	0	0	0	1	1	0	1	2	1	3	2	1	3	2	2	2	1	2	2	40	200	280	2450	240	520	1.66	18.14
7	4	2	163	40	2009	11	1	2	2	15	4	20	5	30	300	0	1	1	1	1	1	1	1	5	5	5	5	4	4	5	5	1	3	2	4	30	80	150	2100	110	260	1.63	15.06
7	4	2	168	43	2010	9	1	2	1	30	2	40	5	20	410	0	1	0	0	0	0	1	1	3	2	4	1	5	4	1	2	1	5	2	5	30	80	100	2870	110	210	1.68	15.24
7	4	2	161	48	2010	7	1	1	3	10	4.5	25	6	30	540	0	0	0	1	0	0	0	0	2	2	1	2	1	2	2	2	1	2	2	2	30	112.5	180	3780	142.5	322.5	1.61	18.52
7	4	2	155	47	2010	7	1	2	1	30	2	40	7	30	360	0	1	0	0	1	0	0	1	2	2	2	2	1	2	3	1	2	3	2	2	30	80	210	2520	110	320	1.55	19.56
7	4	2	166	67	2009	10	1	2	2	15	4	20	7	50	300	0	0	1	0	0	0	0	1	5	2	3	5	2	4	5	5	2	2	2	2	30	80	350	2100	110	460	1.66	24.31
7	4	2	160	62	2010	9	1	2	1	30	2	30	2	10	30	0	0	0	0	0	0	0	0	2	2	3	2	2	2	2	2	2	2	2	2	30	60	20	210	90	110	1.6	24.22
7	4	2	164	50	2009	9	1	2	1	20	3	30	7	20	180	1	1	1	1	1	1	0	1	2	2	3	3	2	4	2	3	2	3	2	2	20	90	140	1260	110	250	1.64	18.59
7	6	2	170	56	2007	2	1	3	2	30	2	20	5	10	600	0	1	0	1	1	0	0	1	3	1	1	2	2	2	2	2	1	2	2	2	60	40	50	4200	100	150	1.7	19.38
7	6	2	168	52	2006	8	1	3	5	10	5	10	7	30	540	0	0	1	1	1	1	0	1	4	2	3	3	1	3	2	2	1	2	2	1	50	50	210	3780	100	310	1.68	18.42
7	6	2	161	48	2008	8	1	2	5.3	40	7	30	7	30	500	1	0	1	0	1	1	1	1	5	2	5	5	2	5	1	1	1	1	1	1	213.33	210	210	3500	423.33	633.33	1.61	18.52
7	6	2	165	52	2008	10	1	2	7	30	7	30	7	30	720	1	1	1	1	1	1	1	1	3	2	3	3	3	3	4	4	2	3	3	3	210	210	210	5040	420	630	1.65	19.1
7	6	2	175	53	2008	11	1	2	5	40	5.67	23.3	5	10	600	1	1	1	1	1	0	0	1	1	2	1	3	3	1	3	3	1	1	1	1	200	132.22	50	4200	332.22	382.22	1.75	17.31
7	6	2	161	50	2008	3	1	3	3	60	5	60	7	10	720	0	1	1	1	1	1	1	1	5	5	5	5	5	5	5	5	5	5	5	5	180	300	70	5040	480	550	1.61	19.29
7	6	2	167	64	2008	10	1	3	4	45	4	20	7	20	700	0	0	0	1	0	0	0	1	3	3	3	4	3	3	2	2	3	5	5	2	180	80	140	4900	260	400	1.67	22.95
7	6	2	162	65	2008	1	1	3	2.5	70	1.5	100	4.5	120	600	1	0	1	1	0	1	0	1	3	4	3	2	2	2	2	5	4	2	3	5	175	150	540	4200	325	865	1.62	24.77
7	6	2	165	53	2007	9	1	1	5	30	5	20	7	30	480	0	0	0	0	1	0	0	0	3	2	2	3	3	3	2	1	2	1	1	3	150	100	210	3360	250	460	1.65	19.47
7	6	2	167	75	2008	1	1	3	5	30	2	20	2	20	560	1	0	0	0	1	1	0	1	3	3	3	4	4	4	3	3	1	3	3	2	150	40	40	3920	190	230	1.67	26.89
7	6	2	175	67	2008	11	1	2	3.3	45	2	10	7	26.7	700	0	0	0	0	0	0	0	0	1	1	1	1	1	1	5	5	1	1	1	1	146.25	20	186.67	4900	166.25	352.92	1.75	21.88
7	6	2	162	56	2008	1	1	2	3.5	40	4	40	5	10	720	1	1	1	1	1	1	1	1	4	5	5	5	5	4	2	2	1	3	4	3	140	160	50	5040	300	350	1.62	21.34
7	6	2	165	69	2008	2	1	3	7	20	2	30	3	10	600	1	0	1	1	0	1	0	1	2	3	2	3	2	2	3	2	2	3	3	3	140	60	30	4200	200	230	1.65	25.34
7	6	2	160	54	2008	1	1	3	2	60	5	10	7	10	800	0	0	0	0	1	0	0	1	1	1	1	3	1	1	1	1	1	1	1	1	120	50	70	5600	170	240	1.6	21.09
7	6	2	168	55	2008	6	1	2	2	60	5	20	7	20	600	1	0	1	1	1	0	1	1	3	2	4	4	2	2	3	3	2	2	2	2	120	100	140	4200	220	360	1.68	19.49
7	6	2	160	46	2008	5	1	2	5	20	5	40	6	60	500	0	0	1	0	1	1	0	1	4	2	3	4	3	4	3	2	2	2	2	4	100	200	360	3500	300	660	1.6	17.97
7	6	2	165	57	2008	2	1	2	5	20	5	20	7	30	540	0	0	0	0	1	0	0	1	2	1	1	3	2	1	2	1	1	5	5	2	100	100	210	3780	200	410	1.65	20.94
7	6	2	160	59	2008	11	1	1	5	20	5	20	7	30	500	0	1	0	1	0	0	0	1	3	2	3	2	2	2	3	2	2	2	2	2	100	100	210	3500	200	410	1.6	23.05
7	6	2	173	61	2009	1	1	2	5	20	5	20	7	20	500	1	0	1	1	0	0	0	1	4	5	2	5	5	3	4	2	3	3	2	3	100	100	140	3500	200	340	1.73	20.38
7	6	2	172	59	2008	6	1	3	5	20	2	20	6	30	500	0	0	1	1	0	0	0	1	3	2	1	3	3	3	1	4	1	3	4	3	100	40	180	3500	140	320	1.72	19.94
7	6	2	165	50	2008	6	1	3	5	20	5	30	7	40	400	0	0	0	0	0	1	0	0	1	1	1	2	2	1	1	1	1	1	1	2	100	150	280	2800	250	530	1.65	18.37
7	6	2	165	59	2007	11	1	2	5	20	5	20	2	50	650	0	0	1	0	0	0	0	1	2	2	2	3	2	2	2	1	2	2	2	2	100	100	100	4550	200	300	1.65	21.67
7	6	2	156	45	2008	6	1	2	3	30	2	30	1	30	620	0	1	1	0	1	0	0	1	5	2	1	3	2	2	2	3	1	1	3	2	90	60	30	4340	150	180	1.56	18.49
7	7	2	158	55	2006	6	1	3	4	15	3	15	7	30	330	0	0	0	0	0	0	0	0	2	2	3	4	4	4	4	4	4	4	2	1	60	45	210	2310	105	315	1.58	22.03
7	7	2	161	54	2006	5	1	2	2	30	5	60	7	40	120	0	0	0	1	1	0	0	1	3	3	3	3	2	3	3	2	2	2	3	2	60	300	280	840	360	640	1.61	20.83
7	7	2	163	54	2006	7	1	1	2	30	5	60	7	40	120	0	0	0	1	1	1	0	1	3	2	3	3	2	3	2	2	3	2	5	2	60	300	280	840	360	640	1.63	20.32
7	7	2	173	65	2006	4	1	2	3	20	3	30	4	20	30	0	0	0	1	1	0	0	0	2	3	4	2	3	2	2	2	1	2	4	4	60	90	80	210	150	230	1.73	21.72
7	7	2	167	48	2006	4	1	1	1	30	5	13.3	1	20	100	0	0	1	0	1	0	0	0	1	1	1	1	1	1	1	1	1	1	1	1	30	66.67	20	700	96.67	116.67	1.67	17.21
7	7	2	165	50	2006	6	1	2	1	30	2	35	5	40	20	0	0	0	1	1	0	0	1	4	2	4	3	2	4	2	2	3	3	2	4	30	70	200	140	100	300	1.65	18.37
7	7	2	160	50	2006	6	5	1	2	10	7	30	7	10	400	0	0	0	0	1	0	0	1	3	1	1	3	1	1	2	3	1	2	2	1	20	210	70	2800	230	300	1.6	19.53
7	7	2	164	50	2005	12	1	3	6	50	6	40	7	60	480	0	1	0	0	1	0	0	1	3	1	2	1	3	2	3	1	1	1	1	1	300	240	420	3360	540	960	1.64	18.59
7	7	2	164	46	2006	4	1	3	3	60	6	10	7	30	800	1	0	0	1	1	0	1	1	2	2	5	5	3	5	2	1	2	5	5	5	180	60	210	5600	240	450	1.64	17.1
7	7	2	145.5	48.5	2012	8	1	3	3.5	50	7	30	7	30	60	1	1	1	1	0	0	0	1	1	1	1	4	4	4	5	5	1	1	1	1	175	210	210	420	385	595	1.46	22.91
7	7	2	164	58	2006	10	1	3	3	45	5	10	7	20	600	1	1	0	1	1	0	0	1	2	3	2	4	3	2	4	3	2	2	4	3	135	50	140	4200	185	325	1.64	21.56
7	7	2	173	72	2005	11	1	3	2	60	2	30	7	120	550	0	1	0	1	1	1	0	1	3	2	2	4	2	1	5	3	2	4	1	3	120	60	840	3850	180	1020	1.73	24.06
7	7	2	162	52	2006	7	1	3	3	35	2	40	7	15	600	1	1	1	0	1	0	0	1	5	5	5	5	5	2	4	4	1	5	5	3	105	80	105	4200	185	290	1.62	19.81
7	7	2	166	48	2006	7	1	3	2.5	40	2	40	2	100	500	0	0	0	1	1	1	0	0	3	2	3	3	3	3	3	3	2	2	2	2	100	80	200	3500	180	380	1.66	17.42
7	7	2	168	52	2011	8.5	1	3	3	30	7	10	7	10	780	0	1	1	1	1	1	1	1	4	2	4	4	2	4	4	4	2	5	5	3	90	70	70	5460	160	230	1.68	18.42
7	7	2	159	50	2006	2	1	3	3	30	3	30	7	40	720	0	1	0	1	0	0	0	0	5	1	5	4	4	3	3	1	1	2	1	3	90	90	280	5040	180	460	1.59	19.78
7	7	2	158	51	2006	7	1	3	3	30	5	30	7	50	360	1	1	1	1	1	1	1	1	3	3	3	3	3	3	5	5	4	5	5	4	90	150	350	2520	240	590	1.58	20.43
8	6	1	175	75	2008	4	1	2	3	30	7	30	7	30	590	0	0	1	1	1	0	0	1	3	2	3	2	2	3	3	2	2	1	1	2	90	210	210	4130	300	510	1.75	24.49
8	6	1	180	80	2008	4	1	3	3	30	5	20	7	30	630	0	0	0	0	1	0	0	1	3	2	1	2	2	1	3	3	1	1	2	1	90	100	210	4410	190	400	1.8	24.69
8	6	1	170	50	2008	1	1	3	2	40	2	40	3	10	720	0	0	0	0	0	0	1	1	2	2	2	2	2	2	2	2	2	2	2	2	80	80	30	5040	160	190	1.7	17.3
8	6	1	169	46	2008	9	1	3	2	40	6	30	7	20	660	0	0	1	1	1	1	0	1	2	2	1	2	2	3	4	4	2	2	2	2	80	180	140	4620	260	400	1.69	16.11
8	6	1	169	48	2007	10	1	1	4	20	3	20	6	70	600	0	0	0	0	0	1	1	0	2	3	5	4	3	3	2	3	2	2	3	3	80	60	420	4200	140	560	1.69	16.81
8	6	1	175	59	2008	1	1	3	2	40	2	40	5	25	720	0	0	0	0	0	0	0	1	4	1	1	4	1	1	2	1	1	2	1	3	80	80	125	5040	160	285	1.75	19.27
8	6	1	164	56	2008	1	1	2	2	40	7	10	6.5	25	720	0	0	0	0	0	0	0	0	3	2	1	4	1	1	1	1	1	1	1	1	80	70	162.5	5040	150	312.5	1.64	20.82
8	6	1	180	72	2008	8	1	3	2	40	3	80	4	120	460	1	1	0	0	0	1	0	1	2	2	1	2	3	1	2	2	2	1	1	1	80	240	480	3220	320	800	1.8	22.22
8	6	1	170	88	2008	12	1	3	2	40	3	50	7	60	720	0	0	0	0	1	0	0	1	3	3	2	3	2	3	2	1	2	1	2	3	80	150	420	5040	230	650	1.7	30.45
8	6	1	178	85	2007	12	1	1	2	40	2	40	6.5	25	500	0	0	1	1	1	0	0	1	4	1	2	1	1	1	2	2	2	1	1	1	80	80	162.5	3500	160	322.5	1.78	26.83
8	6	1	188	100	2008	1	1	3	2.3	33.3	3.67	40	3	10	800	0	0	1	1	1	0	1	1	3	3	5	3	2	5	4	5	3	2	2	3	77.78	146.67	30	5600	224.44	254.44	1.88	28.29
8	6	1	176	75	2008	1	1	3	7	10	7	10	7	10	600	1	0	0	0	0	0	0	1	1	1	1	5	5	4	1	1	1	2	1	2	70	70	70	4200	140	210	1.76	24.21
8	6	1	170	55	2008	5	1	3	2.5	27.5	3	30	5	20	600	0	0	1	1	1	0	0	1	3	2	4	2	2	3	5	2	2	1	1	2	68.75	90	100	4200	158.75	258.75	1.7	19.03
8	6	1	175	72	2008	9	1	3	2	30	3	30	5	10	700	0	0	0	0	1	0	0	1	3	3	2	4	4	4	1	1	1	2	1	2	60	90	50	4900	150	200	1.75	23.51
8	6	1	178	75	2007	12	1	2	2	30	5	20	7	20	700	0	0	1	0	1	1	0	1	2	2	2	2	2	2	2	1	2	5	1	2	60	100	140	4900	160	300	1.78	23.67
8	6	1	175	62	2007	11	1	3	2	30	3	30	2	30	600	0	0	0	0	1	0	0	1	3	2	2	3	3	2	3	2	2	3	2	2	60	90	60	4200	150	210	1.75	20.24
8	6	1	178	89	2008	7	1	2	2	30	5	40	7	20	700	0	1	1	1	1	1	1	1	5	4	3	5	5	4	4	4	3	3	4	4	60	200	140	4900	260	400	1.78	28.09
8	6	1	179	79	2008	3	1	1	1	50	5	20	6	20	600	1	0	0	0	1	0	1	1	1	2	2	3	3	3	2	2	2	2	2	3	50	100	120	4200	150	270	1.79	24.66
8	6	1	181	106	2008	6	1	3	5	10	3	30	7	15	600	0	1	0	0	0	1	0	1	2	1	2	3	1	4	3	2	1	5	5	1	50	90	105	4200	140	245	1.81	32.36
8	6	1	168	77	2008	11	1	2	1	50	5	20	5	20	500	0	0	1	0	1	0	0	1	2	2	1	4	2	2	2	2	2	2	2	2	50	100	100	3500	150	250	1.68	27.28
8	6	1	167.5	64	2008	11	1	2	4	11.9	4	11.6	4.5	29.7	546	0	0	1	0	1	0	0	1	3	2	3	3	2	3	2	2	2	2	2	2	47.74	46.45	133.55	3822	94.19	227.74	1.68	22.81
8	6	1	177	68	2008	3	1	3	1.5	30	4	30	7	10	650	0	0	0	1	0	0	0	1	2	2	2	1	1	1	1	4	1	1	3	1	45	120	70	4550	165	235	1.77	21.71
8	6	1	175	55	2008	3	1	2	4	10	4	30	6	30	600	0	0	0	0	1	0	0	1	1	1	1	1	1	1	1	1	1	1	1	1	40	120	180	4200	160	340	1.75	17.96
8	6	1	178	68	2008	7	1	2	1	40	5	35	7	5	680	0	0	0	0	0	0	0	0	1	1	1	1	1	1	1	1	1	1	1	1	40	175	35	4760	215	250	1.78	21.46
8	6	1	174	69	2008	12	1	2	2	20	2	30	6	25	650	0	0	0	1	0	1	0	1	2	1	1	3	1	1	1	1	1	1	1	1	40	60	150	4550	100	250	1.74	22.79
8	6	1	170	74	2008	10	1	3	1.5	25	4	30	7	20	800	1	1	0	0	1	0	0	1	1	1	1	1	1	1	1	1	1	1	1	1	37.5	120	140	5600	157.5	297.5	1.7	25.61
8	6	1	175	60	2008	5	1	2	1	30	6	30	7	20	720	0	0	1	0	1	1	0	1	2	2	2	4	2	4	2	2	2	2	2	3	30	180	140	5040	210	350	1.75	19.59
8	6	1	181	60	2007	12	1	3	1	30	2	40	7	60	600	0	1	1	1	1	1	1	1	2	3	2	3	3	1	1	1	1	1	1	1	30	80	420	4200	110	530	1.81	18.31
8	6	1	171	80	2008	9	1	2	3	10	6	20	7	20	650	0	1	1	1	1	1	1	1	5	5	5	5	5	5	5	5	4	5	5	3	30	120	140	4550	150	290	1.71	27.36
8	6	1	178	56	2007	11	1	2	2	13.3	5	60	6	15	400	1	0	0	0	0	0	0	0	1	1	1	1	1	1	1	1	1	3	1	1	26.67	300	90	2800	326.67	416.67	1.78	17.67
8	6	1	168	66	2008	1	1	2	2	10	2	60	2	20	680	1	0	0	0	1	1	0	1	3	2	2	2	2	1	2	2	3	2	1	2	20	120	40	4760	140	180	1.68	23.38
8	6	1	174	90	2008	7	1	3	2	10	2	60	7	10	800	1	0	1	1	1	0	0	1	4	2	1	2	2	1	3	3	2	3	2	3	20	120	70	5600	140	210	1.74	29.73
8	7	1	174	67	2006	7	1	3	5	15	2	45	6	40	720	0	1	1	1	0	1	1	1	1	2	2	1	3	2	5	5	3	3	5	2	75	90	240	5040	165	405	1.74	22.13
8	7	1	181	60	2006	11	1	3	3	20	2	20	7	15	500	0	0	0	0	1	0	0	1	3	2	2	2	2	2	2	2	2	3	3	2	60	40	105	3500	100	205	1.81	18.31
8	7	1	172	65	2006	10	1	3	2	30	3	40	7	20	300	0	0	0	0	0	1	1	1	3	1	1	2	2	2	1	1	1	1	2	1	60	120	140	2100	180	320	1.72	21.97
8	7	1	168	70	2005	10	1	3	1	60	2	40	7	30	780	0	0	0	0	1	1	0	1	2	3	2	1	1	1	1	1	1	1	1	1	60	80	210	5460	140	350	1.68	24.8
8	7	1	182	60	2006	3	1	3	3	15	6	25	7	30	630	0	1	0	0	1	1	0	1	4	3	3	5	3	5	2	1	1	4	2	3	45	150	210	4410	195	405	1.82	18.11
8	7	1	178	77	2006	2	1	3	1	30	3	60	7	30	300	0	0	0	0	0	0	0	0	1	1	3	1	2	3	1	1	3	1	1	1	30	180	210	2100	210	420	1.78	24.3
8	7	1	173	68	2006	8	1	3	4	5	7	30	6	15	600	0	1	1	1	0	1	0	1	4	3	3	3	3	3	2	3	2	4	4	2	20	210	90	4200	230	320	1.73	22.72
8	7	1	175	70	2006	6	1	3	4	50	7	50	7	15	600	1	0	1	0	1	0	0	1	4	4	2	3	4	2	1	1	1	2	2	1	200	350	105	4200	550	655	1.75	22.86
8	7	1	170	70	2006	6	1	3	4	50	3	60	7	60	500	1	1	1	0	1	1	1	1	3	3	3	3	3	3	3	3	3	3	5	3	200	180	420	3500	380	800	1.7	24.22
8	7	1	173	60	2006	3	1	3	2	50	2	45	1	45	720	1	1	0	1	1	1	0	1	2	1	2	3	1	2	2	1	1	1	1	1	100	90	45	5040	190	235	1.73	20.05
8	7	1	173	58	2006	1	1	3	2	40	2	30	5	10	540	1	1	0	0	1	1	0	1	2	1	1	2	1	2	2	2	2	1	1	1	80	60	50	3780	140	190	1.73	19.38
8	7	1	173	75	2006	7	1	3	4	20	7	15	7	20	720	0	1	1	0	1	0	0	1	3	2	2	2	2	1	1	3	3	3	3	2	80	105	140	5040	185	325	1.73	25.06
8	7	1	177	61	2006	6	1	3	3	20	4	40	2	20	660	0	1	0	0	1	1	0	1	5	2	3	4	3	5	5	5	3	1	2	2	60	160	40	4620	220	260	1.77	19.47
8	7	1	165	65	2006	4	1	3	2	30	5	20	5	20	480	0	0	0	1	0	0	0	0	1	1	1	1	1	2	1	3	1	2	2	1	60	100	100	3360	160	260	1.65	23.88
8	7	1	179	65	2006	7	1	3	2	30	4	40	7	20	400	0	1	1	1	0	0	0	1	4	2	5	5	3	5	2	2	2	3	3	2	60	160	140	2800	220	360	1.79	20.29
8	7	1	171	60	2006	11	1	3	2	20	7	20	7	40	600	0	0	0	1	1	1	0	1	5	4	2	3	3	2	3	3	3	3	3	3	40	140	280	4200	180	460	1.71	20.52
8	7	1	181	81	2008	1	1	2	3	80	3	40	1	60	30	1	0	1	1	1	1	0	1	3	3	1	3	3	3	1	1	1	1	1	1	240	120	60	210	360	420	1.81	24.72
8	7	1	166	60	2007	4	1	1	7	30	3	30	5	40	600	0	1	1	1	1	1	0	1	3	3	3	3	3	3	3	3	3	3	3	3	210	90	200	4200	300	500	1.66	21.77
8	7	1	178	75	2006	12	1	2	7	30	7	30	7	30	300	1	1	0	0	1	1	1	1	3	3	3	3	3	3	2	2	3	2	2	3	210	210	210	2100	420	630	1.78	23.67
8	7	1	173	55	2007	3	1	2	5	35	4	15	6	11	135	0	1	0	1	1	1	0	1	2	3	4	4	2	4	3	1	1	4	4	2	175	60	66	945	235	301	1.73	18.38
8	7	1	180	60	2006	11	1	1	4	30	7	20	7	15	300	0	1	0	0	1	0	0	1	3	2	2	4	3	4	2	3	2	4	3	4	120	140	105	2100	260	365	1.8	18.52
8	7	1	182	80	2007	11	1	2	5	20	4	30	7	30	600	0	1	0	0	1	1	1	1	3	3	3	3	3	3	2	2	2	2	2	3	100	120	210	4200	220	430	1.82	24.15
8	7	1	180	90	2007	7	1	2	5	20	3	20	6	20	600	1	1	0	0	0	0	1	0	3	3	3	3	3	3	3	3	3	3	3	2	100	60	120	4200	160	280	1.8	27.78
8	7	1	180	93	2007	10	1	2	5	20	3	20	5	20	600	0	0	0	0	1	1	0	1	2	2	2	2	2	2	2	2	2	2	2	2	100	60	100	4200	160	260	1.8	28.7
8	7	1	177	62	2006	12	1	2	3	30	7	30	5	50	300	0	0	0	0	0	0	0	0	3	4	3	2	4	5	5	5	4	3	2	3	90	210	250	2100	300	550	1.77	19.79
8	7	1	166	57.5	2006	10	1	2	3	30	3.67	30	4.3	20	114	0	0	1	0	1	0	0	1	3	2	3	3	2	3	2	2	2	2	2	2	90	110	86.67	798	200	286.67	1.66	20.87
8	7	1	177	58	2007	7	1	2	2	40	4	40	7	30	640	0	0	1	0	0	0	0	1	3	2	2	2	2	2	2	2	2	2	2	2	80	160	210	4480	240	450	1.77	18.51
8	7	1	178	69	2006	12	1	1	2	40	2	40	7	11	500	0	0	0	0	0	0	0	1	3	2	3	3	2	3	2	2	2	2	2	2	80	80	77	3500	160	237	1.78	21.78
8	7	1	180	78	2007	9	1	3	2	40	3	20	1	30	150	1	0	1	1	1	1	0	1	5	4	5	5	5	5	4	4	4	4	5	4	80	60	30	1050	140	170	1.8	24.07
8	7	1	175	65	2007	2	1	3	7	10	7	5	7	20	420	1	1	0	0	1	1	1	1	5	5	5	5	5	5	5	5	3	5	5	3	70	35	140	2940	105	245	1.75	21.22
8	7	1	175	74	2007	4	1	2	3	20	5	40	6	20	300	0	1	1	1	0	0	0	1	3	2	2	2	2	3	2	2	3	2	2	3	60	200	120	2100	260	380	1.75	24.16
8	7	1	170	55	2007	1	1	3	2	20	5	30	2	10	40	1	0	1	1	0	1	0	1	4	5	2	4	3	3	5	4	3	2	2	2	40	150	20	280	190	210	1.7	19.03
8	7	1	173	72	2007	5	1	1	4	10	7	10	7	30	500	0	0	0	0	0	0	0	1	3	1	1	3	3	3	2	1	1	2	1	3	40	70	210	3500	110	320	1.73	24.06
8	7	1	178	118	2007	1	1	1	2	20	3	20	7	30	60	0	1	1	0	1	0	0	1	2	2	2	2	2	2	2	2	2	2	2	2	40	60	210	420	100	310	1.78	37.24
8	8	1	184	100	2005	12	1	3	6	30	3	40	7	40	720	0	1	0	0	1	0	1	1	1	1	3	1	1	1	1	1	1	3	2	1	180	120	280	5040	300	580	1.84	29.54
8	8	1	175	60	2005	10	1	3	5	30	3	20	5	20	420	0	0	1	1	0	1	1	1	3	3	4	3	2	4	3	5	4	3	5	4	150	60	100	2940	210	310	1.75	19.59
8	8	1	174	72	2005	11	1	3	3	40	3	40	7	30	720	1	1	1	1	1	1	0	1	3	2	2	2	2	2	1	2	1	1	2	1	120	120	210	5040	240	450	1.74	23.78
8	8	1	178	69	2005	12	1	3	6	20	6	50	7	15	540	1	1	1	1	0	1	0	1	3	2	2	2	1	1	1	1	1	2	2	2	120	300	105	3780	420	525	1.78	21.78
8	8	1	190	67	2005	8	1	3	2	60	7	30	7	15	60	1	1	1	1	1	1	0	1	5	5	5	5	5	5	2	2	2	4	3	2	120	210	105	420	330	435	1.9	18.56
8	8	1	194	113	2005	12	1	3	3	30	1	20	7	20	600	0	0	0	0	0	1	0	0	3	2	2	3	2	2	3	1	2	3	1	1	90	20	140	4200	110	250	1.94	30.02
8	8	1	187	120	2006	7	1	3	2	30	2	120	7	100	360	0	0	0	0	0	1	0	1	5	5	5	5	5	5	2	2	1	2	2	1	60	240	700	2520	300	1000	1.87	34.32
8	8	1	180	76	2006	6	1	3	2	20	4	40	7	60	480	1	1	1	1	1	1	1	1	4	4	3	3	3	2	2	2	3	3	2	2	40	160	420	3360	200	620	1.8	23.46
8	8	1	183	89	2006	8	1	3	1	40	3	60	7	60	300	1	1	1	1	1	1	1	1	5	5	5	5	5	5	4	4	3	5	5	5	40	180	420	2100	220	640	1.83	26.58
8	8	1	184	70	2006	1	1	3	1	30	2	60	2	30	300	1	1	0	0	1	1	1	1	4	3	2	3	4	2	5	5	3	2	3	2	30	120	60	2100	150	210	1.84	20.68
8	8	1	193	100	2006	2	1	3	1	30	6	30	7	10	660	1	1	1	1	1	1	1	1	3	3	3	3	2	3	2	1	2	2	1	2	30	180	70	4620	210	280	1.93	26.85
8	8	1	181	66	2006	3	1	2	5	30	7	50	7	30	600	1	0	1	1	1	1	0	1	1	1	1	1	1	1	2	2	2	3	1	1	150	350	210	4200	500	710	1.81	20.15
8	8	1	180	60	2006	3	1	3	3	40	1	50	7	40	600	0	0	0	0	1	0	0	1	3	3	5	4	4	4	5	5	3	3	3	3	120	50	280	4200	170	450	1.8	18.52
8	8	1	183	65	2006	11	1	3	5	30	5	30	7	60	420	1	0	1	1	1	1	1	1	5	5	3	5	5	4	2	2	2	1	1	2	150	150	420	2940	300	720	1.83	19.41
8	8	1	183	60	2006	10	1	2	2	20	5	30	2	10	40	0	0	0	0	0	1	0	1	3	2	2	3	4	3	2	3	2	2	3	3	40	150	20	280	190	210	1.83	17.92
8	8	1	180	60	2007	2	1	1	2	20	3	20	7	20	60	0	1	1	1	1	1	0	1	3	2	3	3	2	3	2	2	2	2	2	2	40	60	140	420	100	240	1.8	18.52
8	8	1	180	90	2005	10	1	3	5	60	7	30	7	30	600	0	0	0	1	1	1	1	1	3	3	3	3	3	4	3	4	2	3	4	4	300	210	210	4200	510	720	1.8	27.78
8	8	1	170	72	2005	2	1	2	5	60	4	45	7	40	600	1	1	0	0	1	0	0	0	3	3	3	3	3	3	2	2	1	2	2	1	300	180	280	4200	480	760	1.7	24.91
8	8	1	185	80	2005	9	1	2	4	60	2	60	7	15	90	1	0	0	0	1	0	1	1	2	3	3	2	3	1	2	2	2	3	3	1	240	120	105	630	360	465	1.85	23.37
8	8	1	185	75	2005	9	1	2	7	30	7	30	4	15	720	1	1	0	0	0	0	0	1	3	2	2	3	1	1	1	1	1	1	1	1	210	210	60	5040	420	480	1.85	21.91
8	8	1	175	60	2005	7	1	2	3	60	1	30	3	30	300	1	1	1	1	1	0	1	1	5	5	5	5	5	5	5	5	5	5	5	1	180	30	90	2100	210	300	1.75	19.59
8	8	1	183	77	2004	2	1	1	7	25	6	10	7	25	610	0	0	0	1	0	1	1	0	4	5	2	5	3	3	2	4	3	1	2	5	175	60	175	4270	235	410	1.83	22.99
8	8	1	182	90	2004	1	1	2	6	20	7	20	7	30	500	0	1	0	0	1	1	1	1	1	1	1	1	1	1	1	1	1	1	1	1	120	140	210	3500	260	470	1.82	27.17
8	8	1	172	85	2005	4	1	2	3	40	2	60	7	120	500	0	0	0	0	1	1	0	1	3	2	2	2	2	2	2	4	2	2	2	2	120	120	840	3500	240	1080	1.72	28.73
8	8	1	180	80	2004	10	1	2	4	30	2	40	7	15	40	1	1	1	1	0	0	1	1	4	3	4	4	3	2	4	4	3	3	2	3	120	80	105	280	200	305	1.8	24.69
8	8	1	187	69	2005	1	1	2	3	30	2	30	7	30	600	1	0	0	0	1	1	1	1	3	3	3	3	3	3	4	3	4	2	3	3	90	60	210	4200	150	360	1.87	19.73
8	8	1	186	99	2004	12	1	2	3	30	7	30	7	30	550	0	0	0	0	1	1	1	1	1	2	4	1	3	3	3	3	4	3	3	3	90	210	210	3850	300	510	1.86	28.62
8	8	1	182	91	2005	3	1	2	2	30	4	30	1	30	300	0	1	0	0	1	1	1	1	3	3	3	4	4	4	2	2	3	3	3	3	60	120	30	2100	180	210	1.82	27.47
8	8	1	184	86	2005	10	1	2	3	20	2	20	4	15	300	0	0	0	0	0	0	0	1	3	2	3	2	2	3	2	3	2	2	3	2	60	40	60	2100	100	160	1.84	25.4
8	8	1	193	105	2005	8	1	2	3	20	3	30	7	30	280	1	1	1	1	1	1	1	1	5	5	5	2	3	4	3	2	2	3	4	2	60	90	210	1960	150	360	1.93	28.19
8	6	2	160	45	2008	6	1	2	2.5	35	2	40	7	20	360	0	0	0	0	0	1	0	1	1	1	1	2	2	2	1	1	1	5	2	5	87.5	80	140	2520	167.5	307.5	1.6	17.58
8	6	2	164	47	2008	2	1	2	2	40	3	40	7	20	560	0	1	1	1	1	1	1	1	3	3	3	3	4	4	5	5	2	2	2	3	80	120	140	3920	200	340	1.64	17.47
8	6	2	172	55	2008	1	1	2	2	40	7	20	3.5	7.5	600	1	0	0	0	1	0	0	1	3	1	5	5	5	5	3	1	2	4	1	3	80	140	26.25	4200	220	246.25	1.72	18.59
8	6	2	157	48	2008	7	1	3	7	10	7	10	7	10	600	0	0	0	0	1	0	0	1	3	1	3	3	1	3	3	2	2	2	2	2	70	70	70	4200	140	210	1.57	19.47
8	6	2	174	54	2008	3	1	3	3	22.5	2	20	5	10	800	0	1	0	0	0	0	0	0	2	1	1	1	1	2	3	1	1	1	2	1	67.5	40	50	5600	107.5	157.5	1.74	17.84
8	6	2	166	40	2007	9	1	2	3	20	5	30	6	50	600	0	1	1	1	0	0	0	0	5	1	1	5	1	1	1	1	1	1	1	1	60	150	300	4200	210	510	1.66	14.52
8	6	2	160	46	2008	10	1	3	5	10	5	30	4	20	640	0	0	1	1	1	1	0	1	2	2	3	3	2	2	2	2	2	2	2	1	50	150	80	4480	200	280	1.6	17.97
8	6	2	168	55	2008	8	1	3	5	10	5	20	7	30	590	1	0	0	0	1	0	1	1	2	2	2	4	4	4	2	1	1	4	4	4	50	100	210	4130	150	360	1.68	19.49
8	6	2	160	55	2008	4	3	2	5	10	5	20	6	30	550	0	1	0	0	1	1	1	0	3	3	3	4	3	1	5	5	2	5	5	2	50	100	180	3850	150	330	1.6	21.48
8	6	2	163	60	2007	9	1	3	5	10	5	50	6	30	480	0	0	0	0	0	1	0	1	2	2	2	4	2	2	4	1	2	2	2	2	50	250	180	3360	300	480	1.63	22.58
8	6	2	165	66	2007	12	1	3	1.5	30	2	60	4	30	540	0	0	1	0	0	0	0	1	2	2	2	2	2	2	2	2	1	2	2	2	45	120	120	3780	165	285	1.65	24.24
8	6	2	162	47	2008	9	1	2	2	20	2	30	7	20	720	0	1	1	1	1	0	0	1	1	1	1	1	1	1	1	3	1	1	1	1	40	60	140	5040	100	240	1.62	17.91
8	6	2	163	70	2008	10	1	3	1	40	3	40	7	70	600	1	1	1	0	1	1	1	1	3	3	2	4	3	2	2	2	3	3	3	3	40	120	490	4200	160	650	1.63	26.35
8	6	2	167	45	2008	4	1	2	0.5	60	2	40	11	55	480	0	1	0	1	1	1	1	1	2	2	4	3	3	4	1	5	2	3	1	2	30	80	605	3360	110	715	1.67	16.14
8	6	2	171	59	2008	2	1	3	3	10	6	30	7	30	720	1	1	1	1	1	1	1	1	5	4	3	4	2	1	5	5	3	2	2	1	30	180	210	5040	210	420	1.71	20.18
8	6	2	167	52	2008	7	1	2	1	25	2	40	7	10	480	0	0	1	1	0	0	0	0	1	1	2	2	2	3	2	2	1	2	2	2	25	80	70	3360	105	175	1.67	18.65
8	6	2	170	57	2008	1	1	3	1.5	15	3	30	5	10	500	0	0	1	1	1	0	0	0	2	2	2	2	2	2	1	1	2	2	2	2	22.5	90	50	3500	112.5	162.5	1.7	19.72
8	6	2	171	70	2009	1	1	3	1	10	3	30	7	10	640	1	1	1	1	1	1	0	1	4	4	3	4	3	4	4	4	3	4	3	4	10	90	70	4480	100	170	1.71	23.94
8	7	2	164	49.5	2006	6	1	3	2.5	25	5	25	3	60	760	0	1	1	0	1	1	1	1	2	2	3	2	3	3	2	2	2	3	2	2	62.5	125	180	5320	187.5	367.5	1.64	18.4
8	7	2	170	60	2009	11	1	3	3	20	4	30	6	15	700	1	1	0	0	1	1	1	1	4	3	5	4	3	5	5	5	2	2	2	3	60	120	90	4900	180	270	1.7	20.76
8	7	2	165	50	2006	4	1	3	2	30	5	60	7	25	450	1	1	1	1	1	1	1	1	1	2	2	2	2	2	2	2	2	1	2	2	60	300	175	3150	360	535	1.65	18.37
8	7	2	168	68	2006	4	1	3	2	30	3	30	7	20	600	0	0	0	0	0	1	0	1	1	1	1	2	2	4	3	1	1	2	1	2	60	90	140	4200	150	290	1.68	24.09
8	7	2	176	57	2006	3	1	3	5	10	6	25	2	15	600	1	0	0	0	1	1	0	1	3	2	2	4	1	4	3	3	3	2	2	2	50	150	30	4200	200	230	1.76	18.4
8	7	2	162	95	2006	1	1	3	1	20	2	40	8	40	360	0	0	1	1	1	1	1	1	4	1	1	3	3	1	3	3	5	3	3	3	20	80	320	2520	100	420	1.62	36.2
8	7	2	164	50	2006	2	1	3	6	50	1	20	3	20	600	1	1	0	0	1	0	1	1	5	5	4	5	5	4	2	2	2	2	1	2	300	20	60	4200	320	380	1.64	18.59
8	7	2	169	50	2006	8	1	3	6	40	2	60	7	30	500	0	1	1	1	1	1	0	1	3	3	3	3	3	3	2	2	2	2	2	2	240	120	210	3500	360	570	1.69	17.51
8	7	2	171	54	2006	2	1	3	3	60	2	40	7	30	660	1	1	1	0	0	1	1	1	3	2	5	3	3	3	5	5	3	3	3	2	180	80	210	4620	260	470	1.71	18.47
8	7	2	153	56	2005	10	1	3	2	90	2	20	7	120	600	1	1	0	1	1	1	1	1	3	3	2	3	3	3	3	3	3	3	3	3	180	40	840	4200	220	1060	1.53	23.92
8	7	2	163	50	2006	3	1	3	2	60	5	60	7	60	600	1	0	0	1	1	1	1	1	4	4	5	4	4	5	5	5	3	5	5	3	120	300	420	4200	420	840	1.63	18.82
8	7	2	162	52	2006	5	1	3	2	50	2	50	7	20	660	1	1	1	1	1	1	1	1	2	1	1	3	1	2	2	2	1	2	2	1	100	100	140	4620	200	340	1.62	19.81
8	7	2	165	70	2006	5	1	3	6	10	7	20	7	30	480	0	0	0	0	0	0	0	1	4	2	3	4	2	4	2	2	2	2	1	1	60	140	210	3360	200	410	1.65	25.71
8	7	2	163	58	2006	6	1	3	1	15	3	50	4	10	400	1	0	1	1	1	1	1	1	5	2	2	5	2	4	2	3	1	4	3	2	15	150	40	2800	165	205	1.63	21.83
8	7	2	162	42.75	2006	12	1	1	7	40	7	40	7	40	700	1	1	1	1	0	1	0	1	4	2	4	2	1	3	3	2	1	2	1	1	280	280	280	4900	560	840	1.62	16.29
8	7	2	162	55	2009	7.5	1	3	4	60	6	30	7	30	480	0	1	1	0	1	0	0	1	2	1	2	3	2	3	2	1	1	2	2	2	240	180	210	3360	420	630	1.62	20.96
8	7	2	165	55	2007	12	1	3	4.5	45	6	15	7	10	60	1	0	1	1	1	0	0	0	3	3	3	2	3	3	3	4	2	2	3	4	202.5	90	70	420	292.5	362.5	1.65	20.2
8	7	2	162	50	2007	4	1	2	6	30	6	20	7	40	400	1	0	0	0	0	0	1	1	4	3	4	4	3	4	4	4	4	4	4	4	180	120	280	2800	300	580	1.62	19.05
8	7	2	163	58	2007	5	1	3	7	20	7	20	7	20	480	0	1	0	1	1	0	0	1	4	2	1	2	2	1	2	2	1	3	2	1	140	140	140	3360	280	420	1.63	21.83
8	7	2	160	62	2007	8	1	1	1.5	85	2	30	6	10	720	0	1	1	1	1	0	0	1	3	2	3	3	2	3	2	2	2	2	3	3	127.5	60	60	5040	187.5	247.5	1.6	24.22
8	7	2	163	60	2007	2	1	3	3	40	3	40	7	30	206.7	0	0	1	0	1	1	0	1	3	2	2	3	3	3	1	1	1	2	2	2	120	120	210	1446.67	240	450	1.63	22.58
8	7	2	168	66	2007	8	1	2	6	15	3.67	33.3	7	15	480	0	1	0	0	0	1	0	0	5	2	3	1	1	1	3	4	2	3	1	2	90	122.22	105	3360	212.22	317.22	1.68	23.38
8	7	2	167	55	2007	7	1	2	3	30	3	30	7	20	50	0	0	1	1	1	1	1	1	3	3	3	3	3	3	2	3	2	3	3	3	90	90	140	350	180	320	1.67	19.72
8	7	2	163	55	2007	1	1	2	4	20	7	30	6	13	420	0	0	1	1	1	1	0	1	3	2	3	3	2	3	2	2	2	3	3	2	80	210	78	2940	290	368	1.63	20.7
8	7	2	162	48	2007	7	1	2	2	40	5	40	1	10	600	0	0	1	0	1	1	0	1	2	1	4	4	1	4	2	1	1	2	3	2	80	200	10	4200	280	290	1.62	18.29
8	7	2	168	50	2008	4	2	2	3.5	20	6	20	7	10	330	1	1	1	1	1	1	0	1	4	3	5	4	3	5	3	2	2	2	2	2	70	120	70	2310	190	260	1.68	17.72
8	7	2	163	52	2007	7	1	2	4	15	7	20	7	10	800	0	0	1	1	1	1	0	1	3	3	3	3	3	3	4	3	2	2	2	2	60	140	70	5600	200	270	1.63	19.57
8	7	2	163	48	2006	10	1	3	2	30	2	60	3	30	30	0	0	0	0	0	0	0	1	4	1	1	4	1	5	2	2	1	2	1	1	60	120	90	210	180	270	1.63	18.07
8	7	2	168	75	2007	3	1	2	6	10	2	20	6	20	600	0	0	1	1	1	1	0	1	2	2	3	3	3	3	2	2	2	4	4	2	60	40	120	4200	100	220	1.68	26.57
8	7	2	170	80	2007	11	1	2	6	10	3	12.5	4	17.5	600	0	0	1	1	0	1	0	1	3	2	2	2	2	2	2	2	2	2	2	2	60	37.5	70	4200	97.5	167.5	1.7	27.68
8	7	2	170	60	2006	10	1	1	5	10	7	30	7	30	360	0	0	1	1	0	0	1	1	3	3	3	3	3	3	2	3	2	2	2	2	50	210	210	2520	260	470	1.7	20.76
8	7	2	162	48	2006	10	1	2	5	10	5	30	7	50	360	0	0	0	1	0	1	0	1	2	2	2	1	1	3	2	2	2	5	3	1	50	150	350	2520	200	550	1.62	18.29
8	7	2	166	55	2007	12	1	2	5	10	2	30	7	20	300	0	1	1	1	1	1	0	1	3	3	3	3	3	3	3	4	3	2	2	3	50	60	140	2100	110	250	1.66	19.96
8	7	2	168	76	2006	10	1	2	5	10	5	10	7	20	350	0	0	1	1	0	0	0	0	5	1	1	3	3	3	3	3	1	3	3	3	50	50	140	2450	100	240	1.68	26.93
8	7	2	164	56	2007	6	1	1	2	20	7	10	3	10	540	0	0	0	1	1	0	0	1	1	1	1	3	2	2	1	1	2	2	2	3	40	70	30	3780	110	140	1.64	20.82
8	7	2	150	60	2007	5	1	1	2	20	7	10	4	10	520	0	0	0	0	0	0	0	0	1	2	3	2	1	1	2	1	1	1	1	1	40	70	40	3640	110	150	1.5	26.67
8	7	2	167	57	2007	1	1	3	1	30	3	40	1	20	100	1	1	1	1	0	1	0	1	2	2	2	2	3	1	2	2	2	3	3	3	30	120	20	700	150	170	1.67	20.44
8	7	2	168	56	2007	5	1	2	2	17.5	4	30	7	20	60	0	0	1	1	1	1	0	1	3	3	2	3	2	2	4	2	2	2	2	2	26.25	120	140	420	146.25	286.25	1.68	19.84
8	8	2	154	50	2005	5	1	2	4	80	2	40	2	50	600	1	0	1	1	0	1	1	1	5	5	5	5	5	4	5	5	5	5	5	5	320	80	100	4200	400	500	1.54	21.08
8	8	2	168	50	2005	3	1	2	7	30	7	20	7	50	540	0	0	0	0	1	1	1	1	2	1	2	2	2	2	2	3	2	3	2	2	210	140	350	3780	350	700	1.68	17.72
8	8	2	170	46	2005	9	1	2	5	40	3	10	6	30	20	1	1	0	0	1	1	1	0	2	4	4	3	4	4	2	4	1	2	4	4	200	30	180	140	230	410	1.7	15.92
8	8	2	165	58	2006	9	1	2	2	60	1	30	7	60	400	0	0	0	0	0	0	0	1	1	2	2	2	1	2	2	3	3	2	2	2	120	30	420	2800	150	570	1.65	21.3
8	8	2	162	46	2004	9	1	2	3	30	2	35	1	20	250	0	0	1	1	1	1	0	1	3	4	3	4	4	4	4	3	3	4	4	4	90	70	20	1750	160	180	1.62	17.53
8	8	2	170	62	2005	10	1	2	2	30	3	40	7	10	540	0	0	0	0	1	1	0	0	4	3	3	4	4	4	4	3	3	3	4	3	60	120	70	3780	180	250	1.7	21.45
8	8	2	163	50	2005	6	1	2	2	30	5	20	7	20	500	1	0	1	1	1	1	1	1	3	3	3	3	3	3	3	2	3	2	3	3	60	100	140	3500	160	300	1.63	18.82
8	8	2	164	72	2005	1	1	2	2	30	2	40	7	30	780	0	0	0	0	0	0	0	1	2	2	2	2	2	1	3	2	1	2	2	2	60	80	210	5460	140	350	1.64	26.77
8	8	2	163	58	2005	3	1	2	2	25	4	45	6	30	600	0	0	1	0	1	0	0	1	3	2	4	3	2	4	2	3	3	3	3	3	50	180	180	4200	230	410	1.63	21.83
8	8	2	162	53	2004	4	1	2	1	30	3	45	7	45	615	1	0	1	0	1	1	0	1	3	2	2	2	2	2	3	3	2	2	2	2	30	135	315	4305	165	480	1.62	20.2
5	4	1	160	48	2009	9	1	1	2	30	1	30	2	25	400	0	0	0	0	0	0	0	1	1	2	2	2	1	2	2	3	3	2	2	2	60	30	50	2800	90	140	1.6	18.73
5	4	1	160	48	2009	10	1	1	3	30	1	30	2	25	420	0	0	1	1	1	1	0	1	3	4	3	4	4	4	4	3	3	4	4	4	90	30	50	2900	120	170	1.6	18.68
6	4	1	161	48	2009	10	1	1	3	30	1	30	2	25	440	0	0	0	0	1	1	0	0	4	3	3	4	4	4	4	3	3	3	4	3	90	30	50	3040	120	170	1.61	18.63
1	2	1	161	48	2011	10	1	1	3	30	1	25	2	25	460	1	0	1	1	1	1	1	1	3	3	3	3	3	3	3	2	3	2	3	3	90	25	50	3180	115	165	1.61	18.58
2	2	2	160	48	2011	9	1	1	2	40	1	30	3	25	360	0	0	0	0	0	0	0	1	2	2	2	2	2	1	3	2	1	2	2	2	80	30	75	2520	110	185	1.6	18.83
7	4	2	160	48	2009	9	1	1	2	35	1	30	3	25	380	0	0	1	0	1	0	0	1	3	2	4	3	2	4	2	3	3	3	3	3	70	30	75	2660	100	175	1.6	18.78

## Sheet: Sheet2
Serial Number	Code	Data Item Meaning	Data Item Standard
1	School Address	Province/City where the school is located	Value range: 1-8, representing 8 schools respectively
2	Grade	Grade	Value range: 1-8, representing Grade 5, Grade 6, Grade 7, Grade 8, Grade 9, Grade 10, Grade 11, Grade 12 respectively
3	A101	Gender	Value range: 1-2, representing male and female respectively
4	A102	Height
5	A103	Weight
6	A201	Birth Year
7	A202	Birth Month
8	A3	Ethnic Group	Value range: 1-5, representing Han, Hui, Zhuang, Manchu, and Other respectively
9	A4	Current Living Area	Value range: 1-3, representing Village, Town, and City respectively
10	A501	In the past 7 days, how many days did you do vigorous-intensity physical activities? For example: lifting heavy objects, digging, aerobic exercise or long-distance cycling.
11	A502	On the days when you did vigorous-intensity physical activities, how long did you spend on vigorous-intensity physical activities?
12	A601	In the past 7 days, how many days did you do moderate-intensity physical activities? For example: lifting lighter objects.
13	A602	On the days when you did moderate-intensity physical activities, how long did you spend on moderate-intensity physical activities?
14	A701	In the past 7 days, how many days did you take a walk of at least 10 minutes at a time?
15	A702	On the days when you took a walk of at least 10 minutes at a time, how long did you usually walk each day?
16	A801	In the past 7 days, how long do you spend sitting still on average every day?
17	X1	Fitness room
18	X2	Indoor activity room
19	X3	Fitness trails
20	X4	Living room sports space
21	X5	Family sports equipment (FSE)
22	X6	Jump rope
23	X7	Running shoes
24	X8	Racket (Table tennis, badminton, tennis, etc.）
25	X9	Ball (Basketball, football, volleyball, etc.)
26	X10	Parent encourage and support strategies (PES)
27	X11	My father often encouraged me to do physical activity
28	X12	My father often sent me to physical exercise
29	X13	My father praised me for being active
30	X14	My mother often encouraged me to do physical activity
31	X15	My mother often sent me to physical exercise
32	X16	My mother praised me for being active
33	X17	Parental role models (PRM)
34	X18	Father exercise regularly
35	X19	My father often used exercise to relax himself
36	X20	I often exercise with my father
